# Supplementary material for: NAMPT-targeting PROTAC promotes antitumor immunity via suppressing myeloid-derived suppressor cell expansion
Source: PubMed Central journal article supplement — Acta Pharm Sin B. 2021 Dec 31;12(6):2859–68. doi: 10.1016/j.apsb.2021.12.017 (PMC9214341; doi:10.1016/j.apsb.2021.12.017), 2021-12-31
Supplement: mmc1.pdf [file mmc1.pdf]

## **Supporting Information for**

### **Original article**

## **NAMPT-targeting PROTAC promotes antitumor immunity *via* suppressing myeloid-derived suppressor cell expansion**

**Ying Wu<sup>a,†</sup>, Congying Pu<sup>b,†</sup>, Yixian Fu<sup>b</sup>, Guoqiang Dong<sup>a,\*</sup>, Min Huang<sup>b,\*</sup>, Chunquan Sheng<sup>a,\*</sup>**

<sup>a</sup>*School of Pharmacy, Second Military Medical University, Shanghai 200433, China*

<sup>b</sup>*State Key Laboratory of Drug Research, Shanghai Institute of Materia Medica, Chinese Academy of Sciences, University of Chinese Academy of Sciences, Shanghai 201203, China*

Received 28 September 2021; received in revised form 18 November 2021; accepted 29 November 2021

<sup>†</sup>These authors made equal contributions to this work.

\*Corresponding authors: dgq-81@163.com (Guoqiang Dong); mhuang@simm.ac.cn (Min Huang); shengcq@smmu.edu.cn (Chunquan Sheng).

### **Supporting figures (Figure S1–S5)**

### **Supporting schemes (Scheme S1–S4)**

### **Supporting methods**

### **Supporting structure identification spectra**

### **Supporting references**

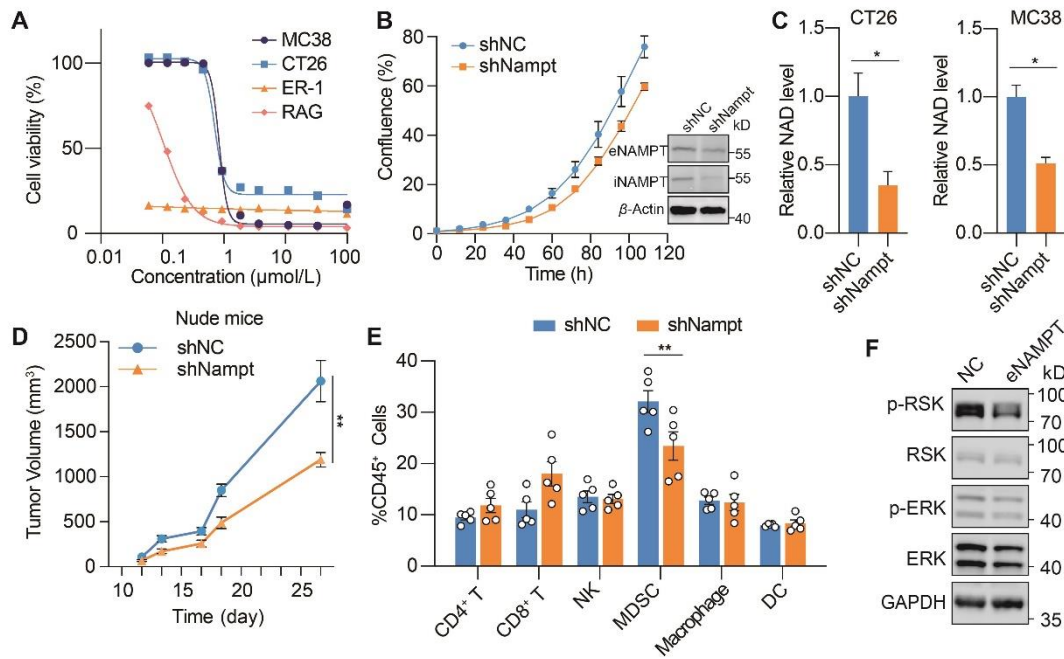

**Figure S1** NAMPT facilitates the expansion of MDSCs independent of its enzymatic activity. (A) FK866 sensitivity. Cells were treated with FK866 at gradient concentrations for 72 h and cell viability was examined by (sulforhodamine B) SRB assay. (B) Growth of MC38 cells with stable knockdown of NAMPT. Left, MC38 scramble control (shNC) or shNAMPT cell confluency assessed by incuCyte proliferation assay; Right, immunoblot analysis of NAMPT knockdown efficiency. (C) Intracellular NAD<sup>+</sup> level change in CT26 and MC38 cells with stable knockdown of NAMPT. (D) Tumor growth curve in nude mice. CT26 scramble control or shNAMPT cells were inoculated subcutaneously in BALB/c nude mice ( $n = 10$ ). (E) MC38 scramble control or shNAMPT cells were inoculated subcutaneously in C57BL/6 mice ( $n = 5$ ). Tumor infiltrating immune cells were analyzed by flow cytometry. The proportion of the indicated immune cells in tumor infiltrating CD45<sup>+</sup> cells. (F) MDSCs from mouse bone marrow were treated with recombinant NAMPT (200 ng) for 2 h and immunoblot analysis was performed. All data depict the means  $\pm$  SEM; \* $P < 0.05$ , \*\* $P < 0.01$ .

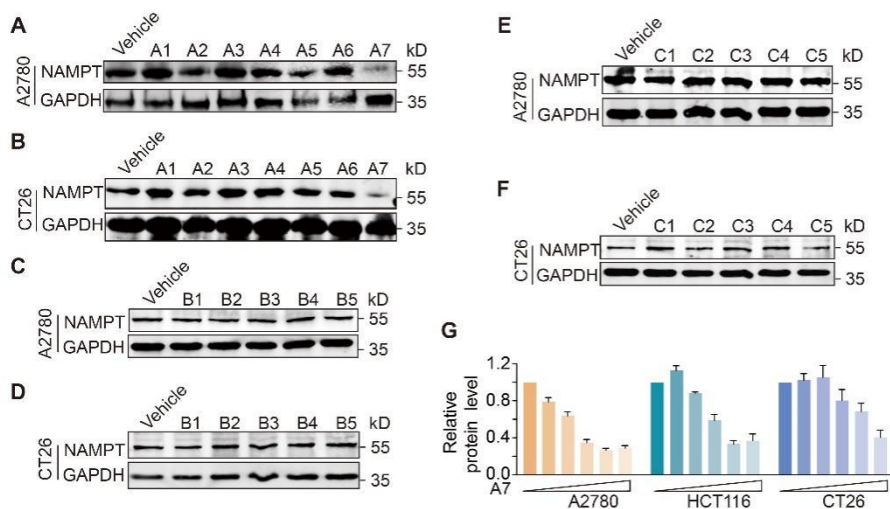

**Figure S2** The rational design of NAMPT-specific PROTACs. (A–F) Immunoblot analysis of NAMPT in A2780 (A, C, E) or CT26 (B, D, F) cells. Cells were treated with Compound **A1–7**, **B1–5** or **C1–5** at 10 nmol/L or 100 nmol/L for 24 h. (G) Semi-quantification of NAMPT expression level versus that of GAPDH based on repeated immunoblot analysis.

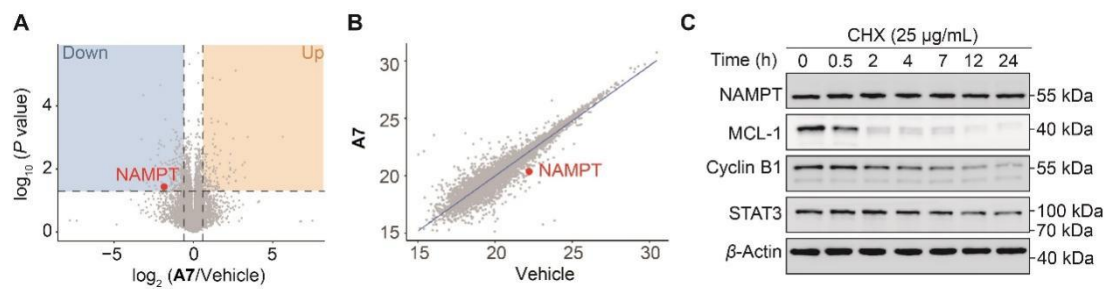

**Figure S3** PROTAC **A7** is a selective degrader of NAMPT. (A, B) The proteomic analysis of **A7**-caused protein degradation in A2780 cells. Cells were treated with **A7** (10 nM, 24 h) or vehicle control. Proteomic analysis was performed to compare the protein level change between **A7** and the control group. (C) Immunoblot analysis of the indicated proteins in A2780 cells treated with cycloheximide (CHX, 25  $\mu\text{g/mL}$ ) at different timepoints.

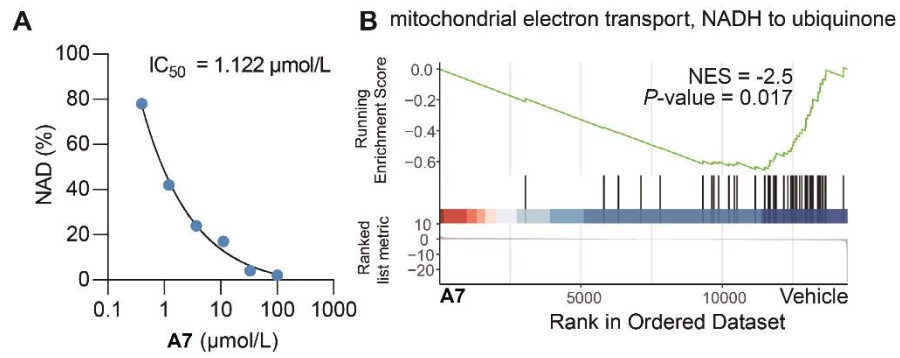

**Figure S4** The impact of compound **A7** on NAD<sup>+</sup>-relating pathway. (A) Intracellular NAD<sup>+</sup> levels in A2780 cells. Cells were treated with PROTAC **A7** as indicated for 24 h. (B) RNAseq analysis of CT26 cells treated with **A7** (100 nmol/L, 24 h) using Gene Set Enrichment Analysis (GSEA).

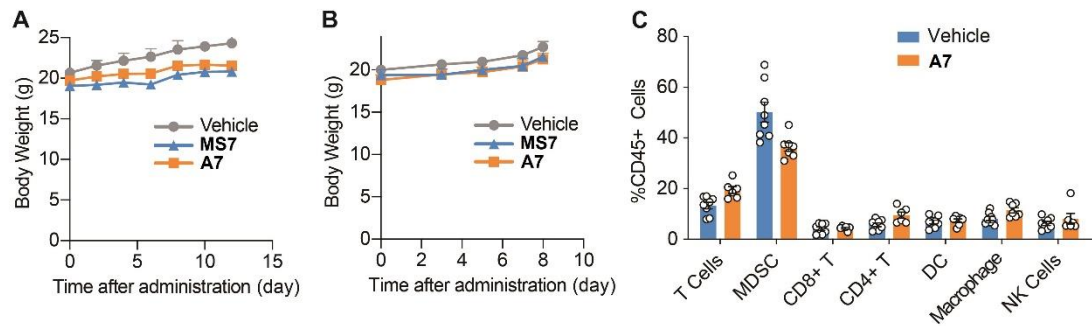

**Figure S5** PROTAC **A7** inhibits MDSCs infiltration and revives antitumor immunity. CT26 tumor bearing BALB/c or nude mice were treated with PROTAC **A7** (16 mg/kg, i.p.), **MS7** (16 mg/kg, i.p.) or vehicle for 12 consecutive days. (A) Body weight in BALB/c mice ( $n = 6$ ). (B) Body weight in nude mice ( $n = 6$ ). (C) The proportion of the indicated immune cells in tumor infiltrating CD45<sup>+</sup> cells. CT26 tumor-bearing BALB/c mice ( $n = 7$  or 8) were treated as in (A) for 7 consecutive days. Tumor infiltrating immune cells were analyzed by flow cytometry.

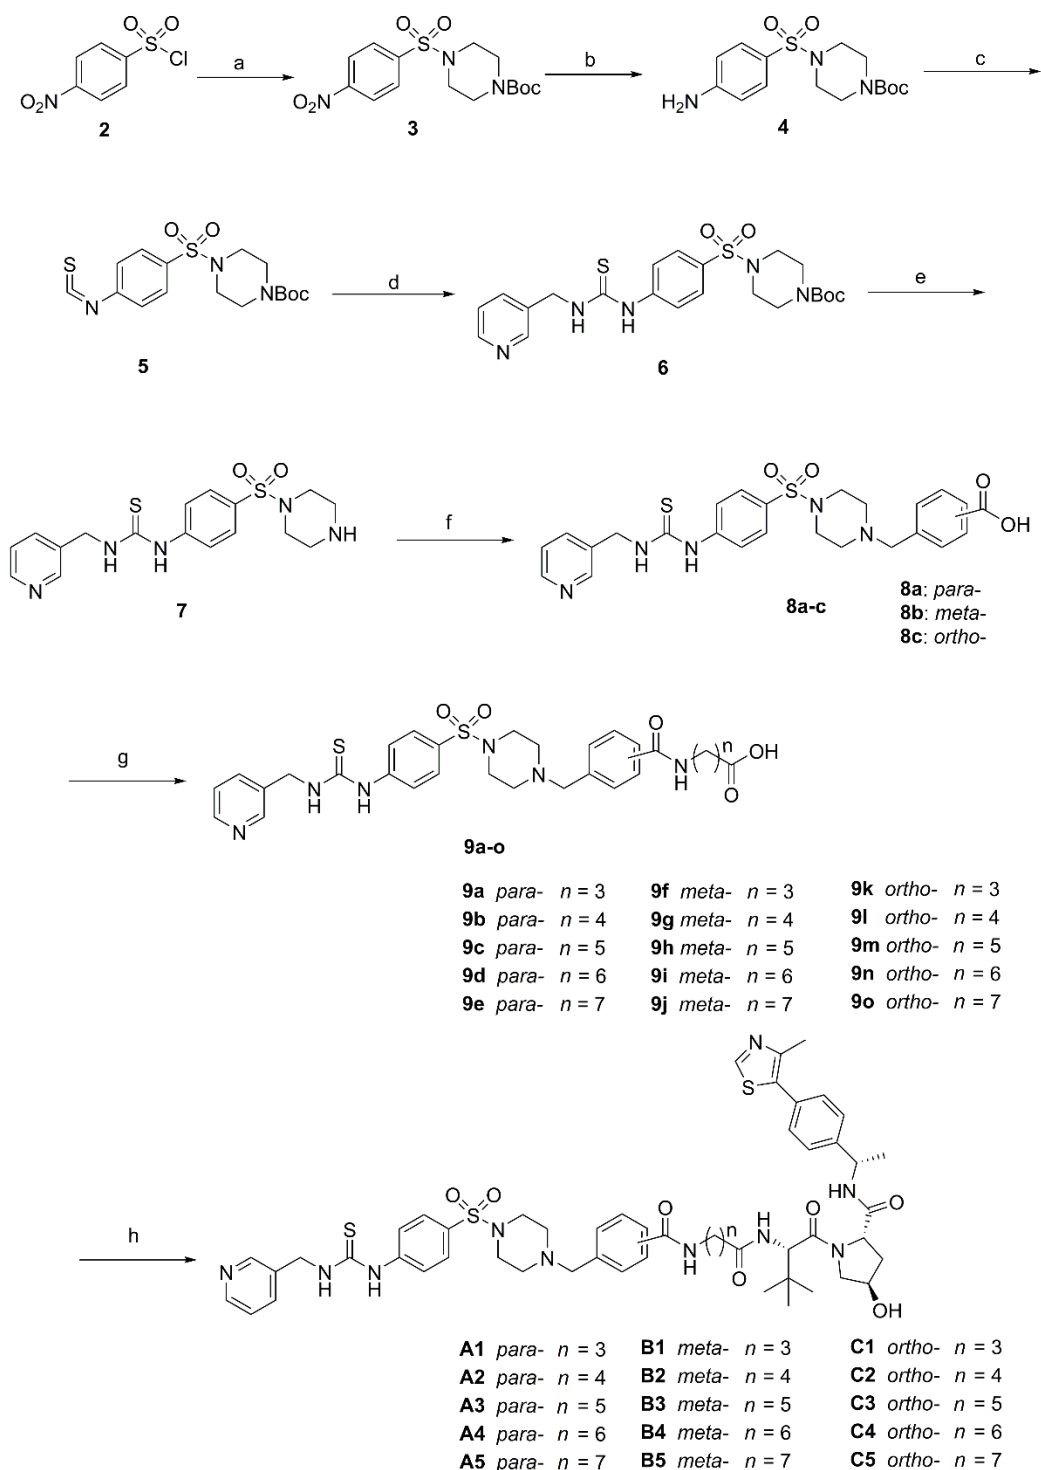

**Scheme S1** Synthetic routes of target compounds **A1–5**, **B1–5** and **C1–5<sup>a</sup>**.

**Reagents and conditions:** (a) *tert*-butyl piperazine-1-carboxylate, Et<sub>3</sub>N, CH<sub>2</sub>Cl<sub>2</sub>, rt, 2 h, 89%; (b) Pd/C, H<sub>2</sub>, CH<sub>2</sub>Cl<sub>2</sub>, rt, overnight, 96%; (c) di(1*H*-imidazol-1-yl)methanethione, CH<sub>2</sub>Cl<sub>2</sub>, rt, overnight, 85%; (d) pyridin-3-ylmethanamine, CH<sub>2</sub>Cl<sub>2</sub>, rt, 6 h, 92%; (e) CF<sub>3</sub>COOH, CH<sub>2</sub>Cl<sub>2</sub>, rt, overnight, 90%; (f) (i) substituted methyl (bromomethyl)benzoate, Et<sub>3</sub>N, CH<sub>2</sub>Cl<sub>2</sub>, rt, 4 h; (ii) LiOH, THF/MeOH/H<sub>2</sub>O, rt, 2 h, 40%–56%; (g) (i) amino acid esters, HATU, DIPEA, DMF, rt, 4 h; (ii) LiOH, THF/MeOH/H<sub>2</sub>O, rt, 4 h, 15%–30%; (h) VHL ligand, HATU, DIPEA, DMF, rt, 5 h, 17%–26%.

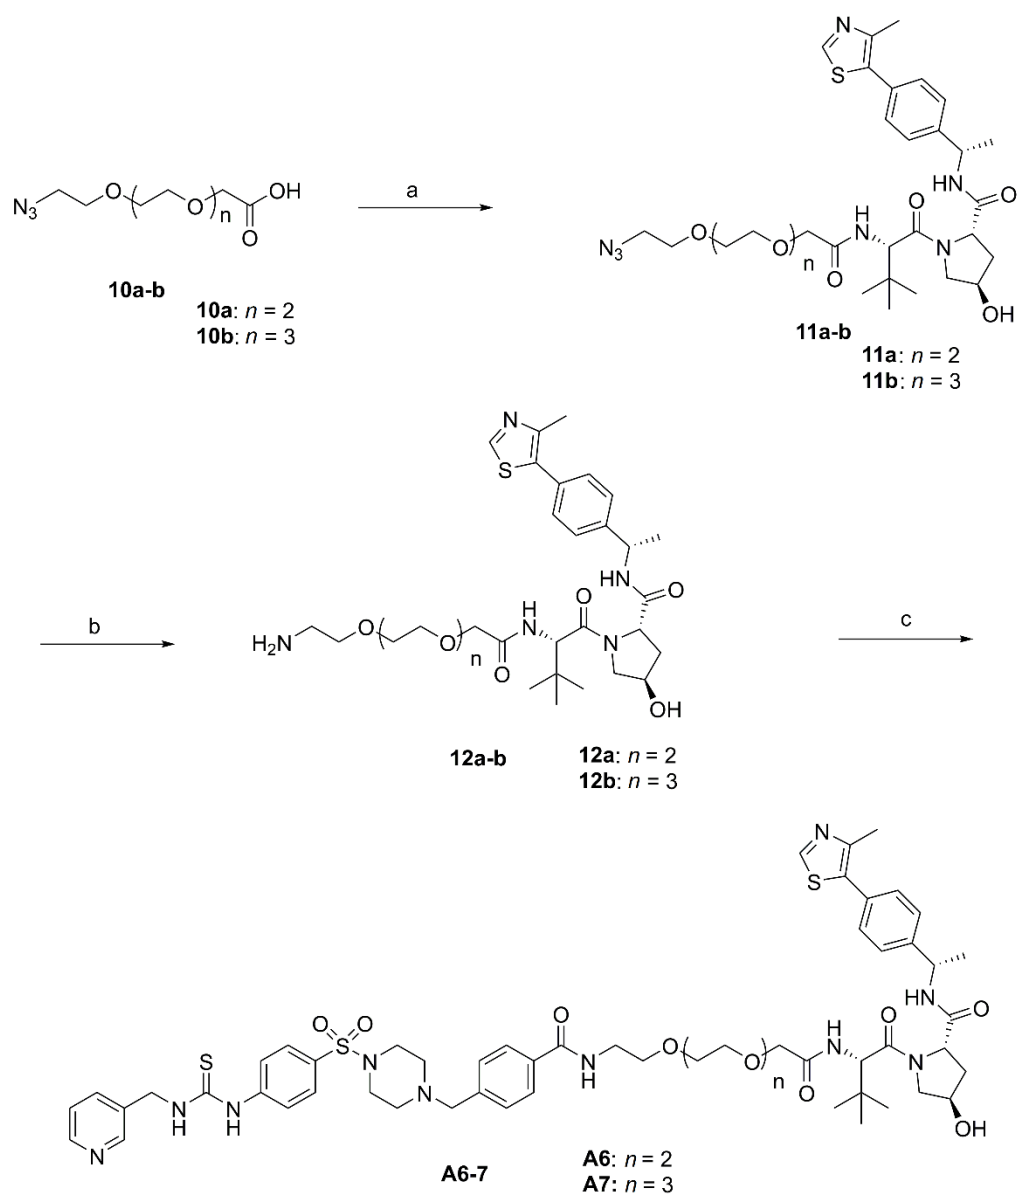

**Scheme S2** Synthetic routes of target compounds **A6** and **A7**<sup>a</sup>.

<sup>a</sup>**Reagents and conditions:** (a) VHL ligand, HATU, DIPEA, DMF, rt, 5 h, 21%–28%; (b) Pd/C, H<sub>2</sub>, CH<sub>2</sub>Cl<sub>2</sub>, rt, overnight, 96%; (c) compound **8a**, HATU, DIPEA, DMF, rt, 5 h, 23%–29%.



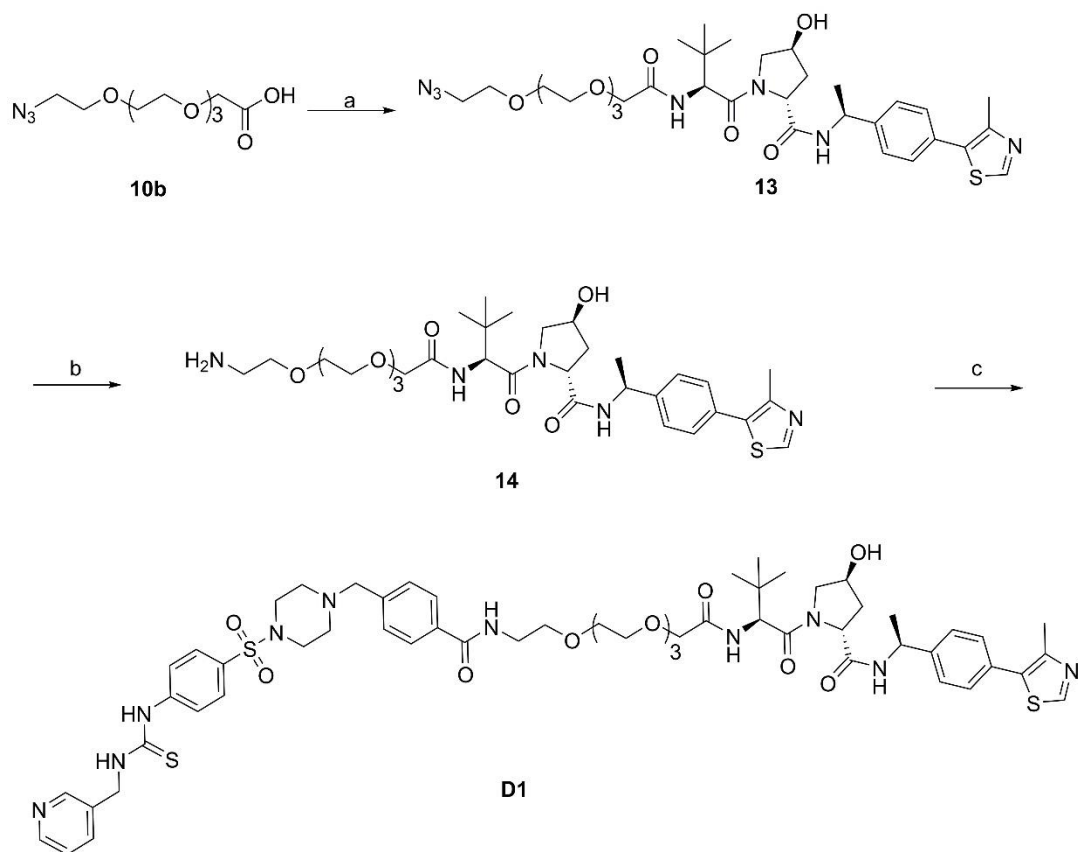

**Scheme S3** Synthetic route of target compound **D1**<sup>a</sup>

<sup>a</sup>**Reagents and conditions:** (a) VHL ligand analog, HATU, DIPEA, DMF, rt, 5 h, 18%; (b) Pd/C, H<sub>2</sub>, CH<sub>2</sub>Cl<sub>2</sub>, rt, overnight, 95%; (c) compound **8a**, HATU, DIPEA, DMF, rt, 5 h, 31%.

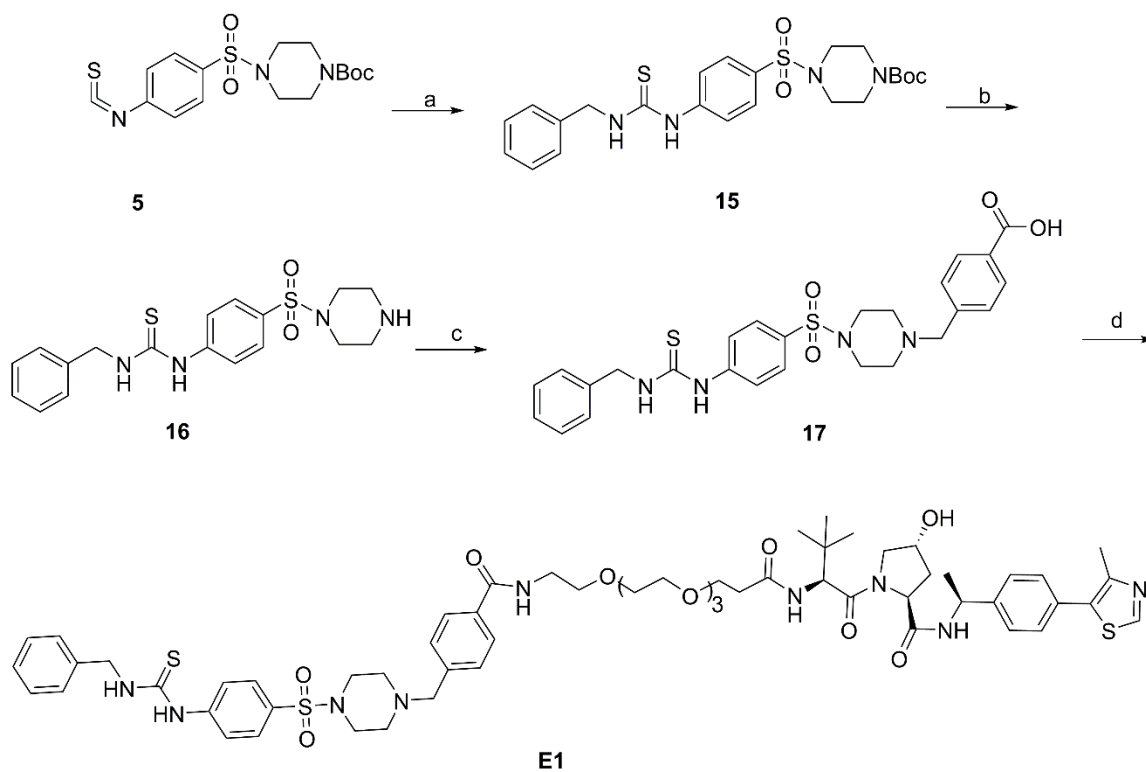

**Scheme S4** Synthetic Route of Target Compound **E1**<sup>a</sup>

<sup>a</sup>**Reagents and conditions:** (a) phenylmethanamine, CH<sub>2</sub>Cl<sub>2</sub>, rt, 6 h, 90%; (b) CF<sub>3</sub>COOH, CH<sub>2</sub>Cl<sub>2</sub>, rt, overnight, 92%; (c) (i) substituted methyl (bromomethyl)benzoate, Et<sub>3</sub>N, CH<sub>2</sub>Cl<sub>2</sub>, rt, 4 h; (ii) LiOH, THF/MeOH/H<sub>2</sub>O, rt, 2 h, 46%; (d) compound **12b**, HATU, DIPEA, DMF, rt, 5 h, 14%.

## Supporting methods

### 1. Chemistry

**General information.** The materials used in the experiments were commercially available. Column chromatography was performed on 200–300 mesh silica gel.  $^1\text{H}$  NMR and  $^{13}\text{C}$  NMR spectra were recorded on Bruker AVANCE300 or AVANCE600 spectrometer (Bruker Company, Germany) with  $\text{DMSO-}d_6$ ,  $\text{CD}_3\text{OD}$  or  $\text{CDCl}_3$  as the solvents and TMS as the internal standard. Chemical shift ( $\delta$ ) was given in ppm and the coupling constant ( $J$ ) is reported in hertz (Hz).

The VHL ligand analog was prepared according to the literature<sup>14</sup>. Intermediate **13** was obtained through amidation between the VHL ligand analog and compound **10b**. Then, intermediate **13** was reduced under a  $\text{H}_2$  atmosphere to afford compound **14**. Target compound **D1** was obtained through amidation between compound **8a** and intermediate **14** (Scheme S3). Intermediate **15** was obtained through the reaction between intermediate **5** and phenylmethanamine. After the removal of the Boc protecting group with trifluoroacetic acid, intermediate **16** was obtained. Then, substituted methyl (bromomethyl)benzoate was added to give esters, which were converted to the corresponding acid intermediate **17** under basic conditions. Amidation of compound **17** with intermediate **12b** afforded the negative control compound **E1** (Scheme S4).

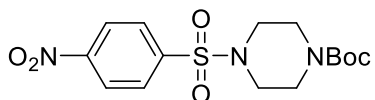

**tert-Butyl-4-((4-nitrophenyl)sulfonyl)piperazine-1-carboxylate (3).** The mixture of compound **2** (500 mg, 2.3 mmol), *tert*-butyl piperazine-1-carboxylate (840 mg, 4.6 mmol) and  $\text{Et}_3\text{N}$  (230 mg, 2.3 mmol) was dissolved in  $\text{CH}_2\text{Cl}_2$  (20 mL) and stirred at room temperature for 2 h. Then, the mixture was washed with 1 mol/L HCl aqueous solution (10 mL) twice. The organic phase was dried over anhydrous  $\text{Na}_2\text{SO}_4$  and concentrated under reduced pressure to afford the desired compound **3** (760 mg, 89%).  $^1\text{H-NMR}$  ( $\text{DMSO-}d_6$ , 600 MHz)  $\delta$ : 7.78 (d,  $J = 8.78$  Hz, 2H), 7.67 (d,  $J = 8.78$  Hz, 2H), 3.37–3.40 (m, 4H), 2.85–2.89 (m, 4H), 1.34 (s, 9H).

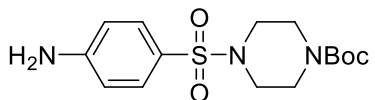

**tert-Butyl-4-((4-aminophenyl)sulfonyl)piperazine-1-carboxylate (4).** The intermediate **3** (750 g, 2.0 mmol) was dissolved in  $\text{CH}_2\text{Cl}_2$  (20 mL) and Pd/C (200 mg, 1.2 mmol, 45% purity) was added. The mixture was stirred at room temperature and maintained overnight under the atmosphere of hydrogen. Then the resulting mixture was filtrated through diatomite and the filtrate was concentrated under reduced pressure to afford the intermediate **4** (650 mg, 96%) as a white solid.  $^1\text{H NMR}$  ( $\text{DMSO-}d_6$ , 600 MHz)  $\delta$ : 7.33 (d,  $J = 8.7$  Hz, 2H), 6.64 (d,  $J = 8.9$  Hz, 2H), 6.11 (s, 2H), 3.33–3.41 (m, 4H), 2.73 (t,  $J = 4.9$  Hz, 4H), 1.34 (s, 9H).

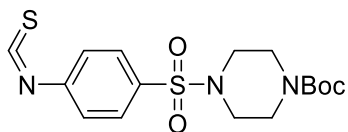

**tert-Butyl-4-((4-(1*H*-imidazole-1-carbothioamido)phenyl)sulfonyl)piperazine-1-carboxylate (5).** The intermediate **4** (650 mg, 1.9 mmol) was previously dissolved in CH<sub>2</sub>Cl<sub>2</sub> and stirred for 5 min at 0 °C. Then, TCDI (462 mg, 2.9 mmol) was added and the solution was allowed to slowly warm to room temperature and stirred overnight. The solvent was removed under reduced pressure and the crude product was purified by silica gel flash chromatography (PE:EA = 20: 1) to afford intermediate **5** (730 mg, 85%) as a white solid. <sup>1</sup>H NMR (600 MHz, DMSO-*d*<sub>6</sub>) δ: 7.76–7.79 (m, 2H), 7.64–7.66 (m, 2H), 3.38 (t, *J* = 8.7 Hz, 4H), 2.87 (t, *J* = 5.1 Hz, 4H), 1.33 (s, 9H).

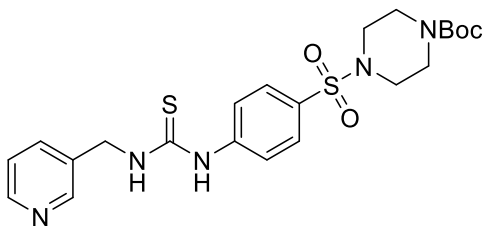

**tert-Butyl-4-((4-(3-(pyridin-3-ylmethyl)thioureido)phenyl)sulfonyl)piperazine-1-carboxylate (6)** To a solution of the intermediate **5** (780 mg, 1.59 mmol) in DCM (10 mL) was added 3-aminomethylpyridine (171 mg, 1.59 mmol) and then the mixture was reacted at room temperature for 6 h. The solid is filtered to obtain the intermediate **6** (720 mg, 92%) as a white solid. <sup>1</sup>H NMR (600 MHz, CD<sub>3</sub>OD) δ: 8.55–8.56 (m, 1H), 8.43 (m, 1H), 7.86–7.89 (m, 1H), 7.69–7.74 (m, 4H), 7.39–7.42 (m, 1H), 4.88 (s, 2H), 3.48 (s, 4H), 2.94 (t, *J* = 5.03 Hz, 4H), 1.39 (s, 9H).

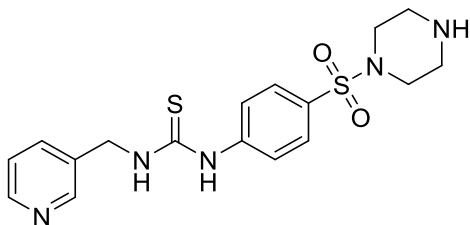

**1-(4-(Piperazin-1-ylsulfonyl)phenyl)-3-(pyridin-3-ylmethyl)thiourea(7)** Compound **6** (500 mg, 1.01 mmol) was dissolved in dry CH<sub>2</sub>Cl<sub>2</sub> (5 mL) containing 20% TFA, and then the mixture was stirred overnight at room temperature. The reaction solution was washed with saturated brine (20 mL), and the organic phase was concentrated to obtain intermediate **7** as a white solid (360 mg, 90%). <sup>1</sup>H NMR (600 MHz, DMSO-*d*<sub>6</sub>) δ: 10.13 (s, 1H), 8.61(s, 1H), 8.56-8.58 (m, 1H), 8.46–8.49 (m, 1H), 7.82 (d, *J* = 8.8 Hz, 2H), 7.66 (d, *J* = 8.8 Hz, 2H), 7.49 (d, *J* = 8.3 Hz, 2H), 4.79 (d, *J* = 5.3 Hz, 2H), 4.30 (s, 1H), 3.74–3.37 (m, 4H), 2.86–3.03 (m, 4H).

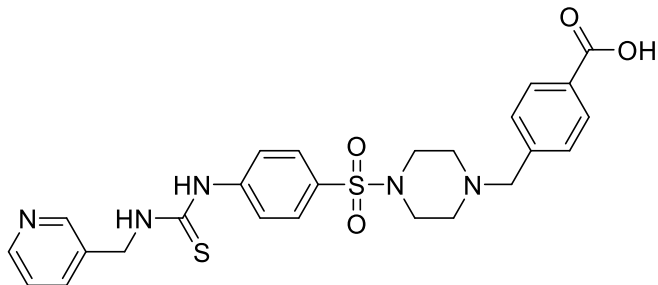

**4-((4-((4-(3-(Pyridin-3-ylmethyl)thioureido)phenyl)sulfonyl)piperazin-1-yl)methyl)benzoic acid (8a)**

Compound **7** (75 mg, 0.14 mmol) and methyl 4-bromomethylbenzoate (70 mg, 0.31 mmol) were dissolved in dry CH<sub>2</sub>Cl<sub>2</sub> (6 mL) containing TEA (100 μL), then the mixture was stirred at room temperature for 4 h. The solution was concentrated and purified by silica gel column chromatography (CH<sub>2</sub>Cl<sub>2</sub>/MeOH = 100/1) to obtain a white solid (110 mg). Then it was then dissolved in THF/MeOH/H<sub>2</sub>O (v/v/v = 3/2/1, 15 mL) containing LiOH (20 mg, 0.84 mmol). The mixture was stirred at room temperature for 2 h, the organic phase is evaporated under vacuum. Then pH was adjusted to about 3 with 1 mol/L HCl. The precipitant was filtered and dried to obtain the intermediate **8a** as a white solid (75 mg, 56%). <sup>1</sup>H NMR (600 MHz, DMSO-*d*<sub>6</sub>) δ: 12.82 (s, 1H), 10.17 (s, 1H), 8.63-8.68 (m, 1H), 8.57 (d, *J* = 1.8 Hz, 1H), 8.48 (dd, *J* = 4.7, 1.6 Hz, 1H), 7.83 (d, *J* = 8.1 Hz, 2H), 7.81 (d, *J* = 9.1 Hz, 2H), 7.77 (d, *J* = 7.7 Hz, 1H), 7.65 (d, *J* = 9.1 Hz, 2H), 7.34–7.40 (m, 3H), 4.79 (d, *J* = 5.4 Hz, 2H), 3.57 (s, 2H), 2.83–2.95 (m, 4H), 2.39–2.49 (m, 4H).

The synthetic routes of compounds **8b** and **8c** were similar to **8a**.

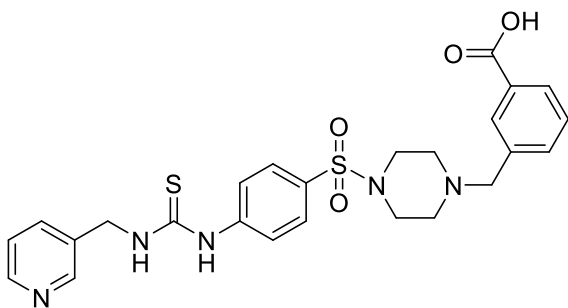

**3-((4-((4-(3-(Pyridin-3-ylmethyl)thioureido)phenyl)sulfonyl)piperazin-1-yl)methyl)benzoic acid (8b)**

White solid, 40%. <sup>1</sup>H NMR (600 MHz, DMSO-*d*<sub>6</sub>) δ: 12.91 (s, 1H), 10.13 (s, 1H), 8.64 (s, 1H), 8.55–8.59 (m, 1H), 8.47 (dd, *J* = 4.6, 1.0 Hz, 1H), 7.80–7.83 (m, 2H), 7.78–7.83 (m, 2H), 7.76–7.78 (m, 1H), 7.65 (d, *J* = 7.6 Hz, 2H), 7.48 (d, *J* = 7.6 Hz, 1H), 7.41 (t, *J* = 15.4, 7.9 Hz, 1H), 7.38 (dd, *J* = 7.8, 4.7 Hz, 1H), 4.79 (d, *J* = 5.4 Hz, 2H), 3.54 (s, 2H), 2.89 (s, 4H), 2.45 (s, 4H).

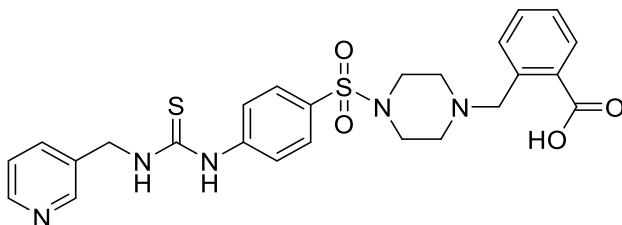

**4-((4-((4-(3-(pyridin-3-ylmethyl)thioureido)phenyl)sulfonyl)piperazin-1-yl)methyl)benzoic acid (8c)**

White solid, 48%. <sup>1</sup>H NMR (600 MHz, DMSO-*d*<sub>6</sub>) δ: 10.13 (s, 1H), 8.64 (s, 1H), 8.47–8.57 (m, 1H), 8.47–8.48 (m, 1H), 7.80–7.82 (m, 2H), 7.76–7.78 (m, 1H), 7.72–7.73 (m, 1H), 7.64–7.66 (m, 2H), 7.45–7.47 (m, 1H), 7.35–7.39 (m, 3H), 4.80 (d, *J* = 5.1 Hz, 2H), 3.82 (s, 2H), 2.79-2.91 (m, 4H), 2.30–2.40 (m, 4H).

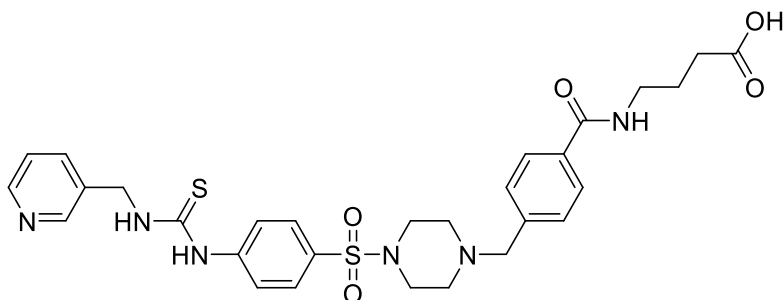

**4-(4-((4-(3-(Pyridin-3-ylmethyl)thioureido)phenyl)sulfonyl)piperazin-1-yl)methyl) benzamido)butanoic acid (9a).** The compound **8** (75 mg, 0.14 mmol), methyl butyrate (15 mg, 0.14 mmol), HATU (81 mg, 0.22 mmol), DIPEA (28 mg, 0.22 mmol) were dissolved in dry DMF (5 mL) and then the mixture was stirred at room temperature for 4 h. The mixture was poured saturated NaCl solution (20 mL) and then extracted with ethyl acetate (10 mL  $\times$  3). The organic phases were combined and washed with of saturated NaCl solution (10 mL). After dried over sodium sulfate, it was concentrated and purified by silica gel column chromatography (dichloromethane/methanol=100/1) to obtain 80 mg of white solid. The obtained product was dissolved in THF/MeOH/H<sub>2</sub>O (*v/v/v* = 3/2/1, 10 mL) containing LiOH (15 mg, 0.63 mmol). The mixture was stirred at room temperature for 4 h, the organic phase is evaporated under vacuum. Then pH was adjusted to about 3 with 1 mol/L HCl. The precipitant was filtered and dried to obtain the intermediate **9a** as a white solid (26 mg, 30%). <sup>1</sup>H NMR (600 MHz, DMSO-*d*<sub>6</sub>)  $\delta$ : 12.08 (s, 1H), 10.39 (s, 1H), 8.79 (s, 1H), 8.41–8.61 (m, 2H), 7.85 (d, *J* = 8.1 Hz, 2H), 7.77 (d, *J* = 7.5 Hz, 2H), 7.63 (d, *J* = 8.8 Hz, 2H), 7.24–7.46 (m, 5H), 4.78 (d, *J* = 5.2 Hz, 2H), 3.59 (s, 2H), 3.11 (d, *J* = 4.8 Hz, 2H), 2.76–3.01 (m, 4H), 2.27–2.49 (m, 4H), 2.22 (t, *J* = 7.1 Hz, 2H), 1.62 (t, *J* = 6.3 Hz, 2H).

The synthetic routes of **9b–o** were similar to that of **9a**.

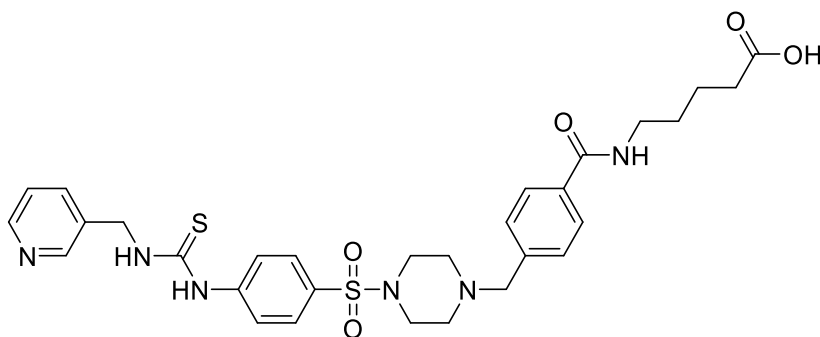

**5-(4-((4-(3-(Pyridin-3-ylmethyl)thioureido)phenyl)sulfonyl)piperazin-1-yl)methyl)benz-amido)pentanoic acid (9b).** White solid, 21%. <sup>1</sup>H NMR (600 MHz, DMSO-*d*<sub>6</sub>)  $\delta$ : 11.97 (s, 1H), 10.45 (s, 1H), 8.76–8.91 (m, 1H), 8.55 (d, *J* = 1.7 Hz, 1H), 8.46 (dd, *J* = 4.7, 1.3 Hz, 1H), 8.37 (t, *J* = 4.9 Hz, 1H), 7.84 (d, *J* = 7.4 Hz, 2H), 7.72–7.77 (m, 3H), 7.63 (d, *J* = 8.7 Hz, 2H), 7.36 (dd, *J* = 7.7, 4.9 Hz, 1H), 7.31 (d, *J* = 7.3 Hz, 2H), 4.78 (d, *J* = 5.6 Hz, 2H), 3.46–3.69 (m, 4H), 3.20 (q, *J* = 6.4 Hz, 2H), 2.88 (s, 4H), 2.36–2.57 (m, 4H), 1.45–1.49 (m, 4H).

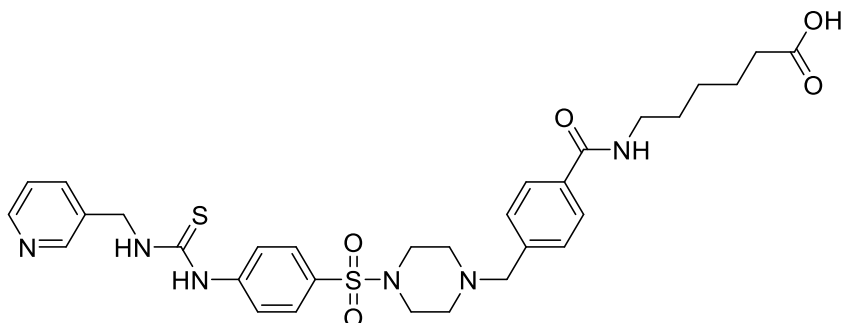

**6-(4-((4-((4-(3-(Pyridin-3-ylmethyl)thioureido)phenyl)sulfonyl)piperazin-1-yl)methyl)benz-amido)hexanoic acid (9c).** White solid, 26%.  $^1\text{H NMR}$  (600 MHz,  $\text{DMSO-}d_6$ )  $\delta$ : 10.27 (s, 1H), 8.71 (s, 1H), 8.55 (s, 1H), 8.46 (d,  $J = 4.4$  Hz, 1H), 8.38 (s, 1H), 7.70–7.84 (m, 6H), 7.63 (d,  $J = 1.6$  Hz, 2H), 7.37 (dd,  $J = 7.7, 4.7$  Hz, 1H), 7.31 (s, 1H), 4.77 (d,  $J = 5.4$  Hz, 2H), 3.17–3.22 (m, 3H), 2.86 (s, 4H), 2.35–2.48 (m, 4H), 2.18 (t,  $J = 7.4$  Hz, 2H), 1.34–1.52 (m, 5H), 1.25–1.30 (m, 2H).

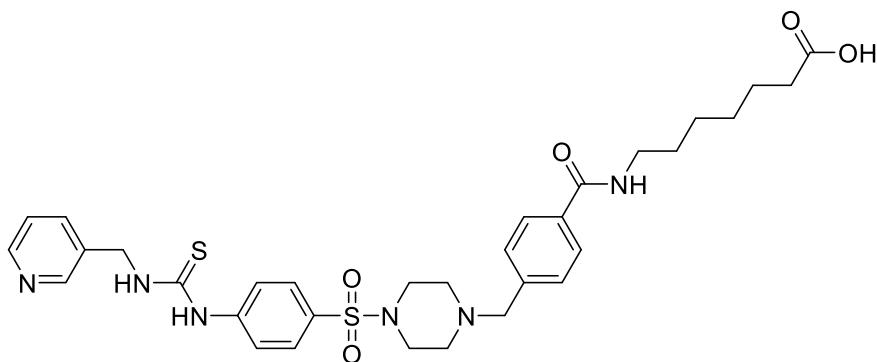

**7-(4-((4-((4-(3-(Pyridin-3-ylmethyl)thioureido)phenyl)sulfonyl)piperazin-1-yl)methyl)benz-amido)heptanoic acid (9d)** White solid, 27%.  $^1\text{H NMR}$  (600 MHz,  $\text{DMSO-}d_6$ )  $\delta$ : 11.94 (s, 1H), 10.47 (s, 1H), 8.84 (s, 1H), 8.55 (d,  $J = 1.6$  Hz, 1H), 8.46 (dd,  $J = 4.9, 1.3$  Hz, 1H), 8.37–8.43 (m, 1H), 7.85 (d,  $J = 8.4$  Hz, 2H), 7.76 (d,  $J = 7.3$  Hz, 3H), 7.63 (d,  $J = 8.8$  Hz, 2H), 7.32–7.42 (m, 3H), 4.78 (d,  $J = 5.6$  Hz, 2H), 3.72 (s, 2H), 3.20 (q,  $J = 6.6$  Hz, 2H), 2.93 (s, 4H), 2.65 (s, 4H), 2.17 (t,  $J = 7.1$  Hz, 2H), 1.43–1.51 (m, 4H), 1.23–1.31 (m, 4H).

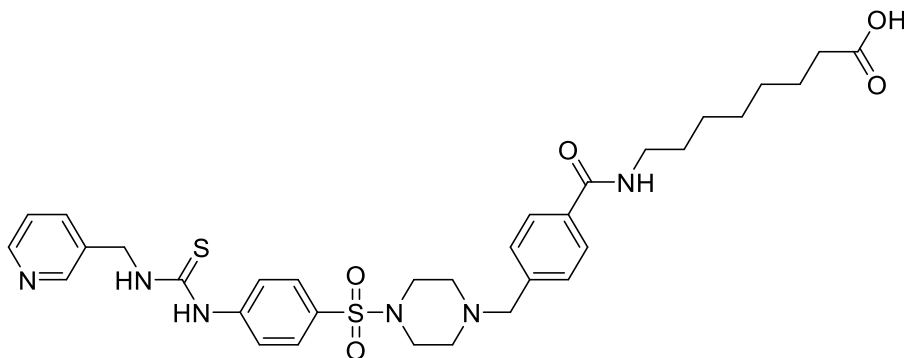

**8-(4-((4-((4-(3-(Pyridin-3-ylmethyl)thioureido)phenyl)sulfonyl)piperazin-1-yl)methyl)benz-amido)octanoic acid (9e)** White solid, 15%.  $^1\text{H NMR}$  (600 MHz,  $\text{DMSO-}d_6$ )  $\delta$ : 12.88 (s, 1H), 11.69 (s, 1H),

8.53 (s, 1H), 8.43 (d,  $J = 4.2$  Hz, 1H), 8.35 (t,  $J = 4.8$  Hz, 1H), 8.00 (d,  $J = 8.2$  Hz, 2H), 7.67–7.78 (m, 3H), 7.55 (d,  $J = 8.8$  Hz, 2H), 7.34 (dd,  $J = 7.8, 4.8$  Hz, 1H), 7.28 (d,  $J = 7.8$  Hz, 2H), 4.76 (s, 2H), 3.45 (s, 2H), 3.17–3.25 (m, 2H), 2.75 (s, 4H), 2.41 (s, 4H), 1.94 (t,  $J = 7.6$  Hz, 2H), 1.30–1.53 (m, 4H), 1.18–1.31 (m, 6H).

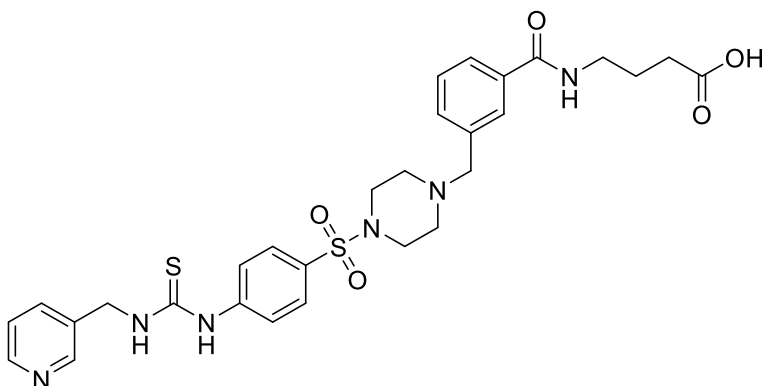

**4-(3-((4-((4-(3-(Pyridin-3-ylmethyl)thioureido)phenyl)sulfonyl)piperazin-1-yl)methyl)benzamido)butanoic acid (9f)** White solid, 28%.  $^1\text{H NMR}$  (600 MHz,  $\text{DMSO-}d_6$ )  $\delta$ : 12.08 (s, 1H), 10.13 (s, 1H), 8.64 (s, 1H), 8.57 (d,  $J = 1.5$  Hz, 1H), 8.47 (dd,  $J = 4.7, 1.4$  Hz, 1H), 8.44 (t,  $J = 5.6$  Hz, 1H), 7.75–7.80 (m, 3H), 7.68–7.70 (m, 2H), 7.64 (d,  $J = 8.9$  Hz, 2H), 7.35–7.40 (m, 3H), 4.79 (d,  $J = 5.5$  Hz, 2H), 3.51 (s, 2H), 3.24 (q,  $J = 6.6$  Hz, 2H), 2.89 (s, 4H), 2.45 (s, 4H), 2.26 (t,  $J = 7.5$  Hz, 2H), 1.70–1.75 (m, 2H).

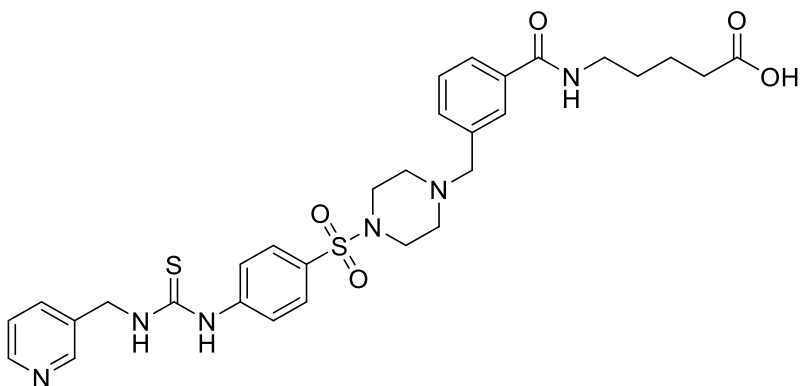

**5-(3-((4-((4-(3-(Pyridin-3-ylmethyl)thioureido)phenyl)sulfonyl)piperazin-1-yl)methyl)benzamido)pentanoic acid (9g)** White solid, 27%.  $^1\text{H NMR}$  (600 MHz,  $\text{DMSO-}d_6$ )  $\delta$ : 10.28 (s, 1H), 8.77 (s, 1H), 8.54 (d,  $J = 1.7$  Hz, 1H), 8.44 (dd,  $J = 4.8, 1.4$  Hz, 1H), 8.40 (t,  $J = 5.6$  Hz, 1H), 7.77 (d,  $J = 8.7$  Hz, 2H), 7.70–7.76 (m, 1H), 7.63–7.69 (m, 2H), 7.60 (d,  $J = 8.7$  Hz, 2H), 7.29–7.38 (m, 3H), 4.76 (d,  $J = 5.3$  Hz, 2H), 3.41–3.55 (m, 4H), 3.21 (q,  $J = 6.8$  Hz, 2H), 2.80–2.93 (m, 4H), 2.39 (s, 4H), 2.21 (t,  $J = 7.6$  Hz, 2H), 1.66–1.75 (m, 2H).



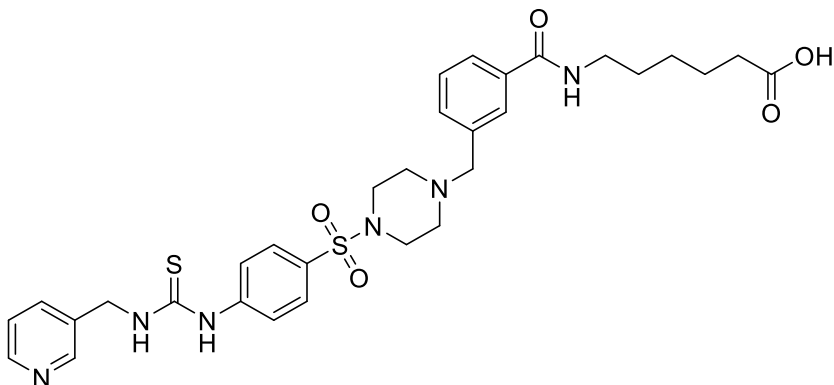

**6-(3-((4-((4-(3-(Pyridin-3-ylmethyl)thioureido)phenyl)sulfonyl)piperazin-1-yl)methyl)benz-amido)hexanoic acid (9h)** White solid, 22%. <sup>1</sup>H NMR (600 MHz, DMSO-*d*<sub>6</sub>)  $\delta$ : 11.99 (s, 1H), 10.37 (s, 1H), 8.81 (s, 1H), 8.57 (s, 1H), 8.47 (d, *J* = 4.1 Hz, 1H), 8.40 (t, *J* = 5.6 Hz, 1H), 7.80–7.85 (m, 2H), 7.77 (d, *J* = 8.3 Hz, 1H), 7.66–7.70 (m, 2H), 7.64 (d, *J* = 8.8 Hz, 2H), 7.34–7.40 (m, 3H), 4.79 (d, *J* = 5.1 Hz, 2H), 3.49 (s, 2H), 3.32 (q, *J* = 6.6 Hz, 2H), 2.88 (s, 4H), 2.43 (s, 4H), 2.19 (t, *J* = 7.5 Hz, 2H), 1.47–1.53 (m, 4H), 1.26–1.31 (m, 2H).

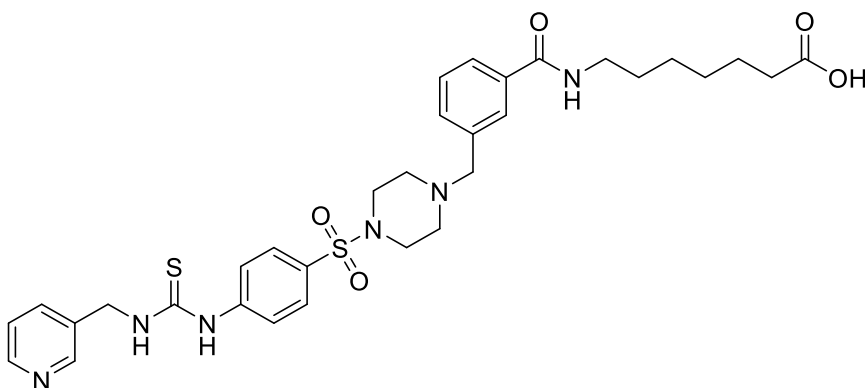

**7-(3-((4-((4-(3-(pyridin-3-ylmethyl)thioureido)phenyl)sulfonyl)piperazin-1-yl)methyl)benz-amido)heptanoic acid (9i)** White solid, 27%. <sup>1</sup>H NMR (600 MHz, DMSO-*d*<sub>6</sub>)  $\delta$ : 12.00 (s, 1H), 10.23 (s, 1H), 8.70 (s, 1H), 8.57 (d, *J* = 1.9 Hz, 1H), 8.47 (dd, *J* = 4.7, 1.3 Hz, 1H), 8.38–8.43 (m, 1H), 7.79–7.85 (m, 2H), 7.75–7.79 (m, 1H), 7.71 (s, 2H), 7.65 (d, *J* = 8.8 Hz, 2H), 7.33–7.43 (m, 3H), 4.79 (d, *J* = 5.5 Hz, 2H), 3.55 (s, 2H), 3.21 (q, *J* = 6.8 Hz, 2H), 2.89 (s, 4H), 2.37–2.49 (m, 4H), 2.19 (t, *J* = 7.4 Hz, 2H), 1.46–1.51 (m, 4H), 1.26–1.30 (m, 4H).

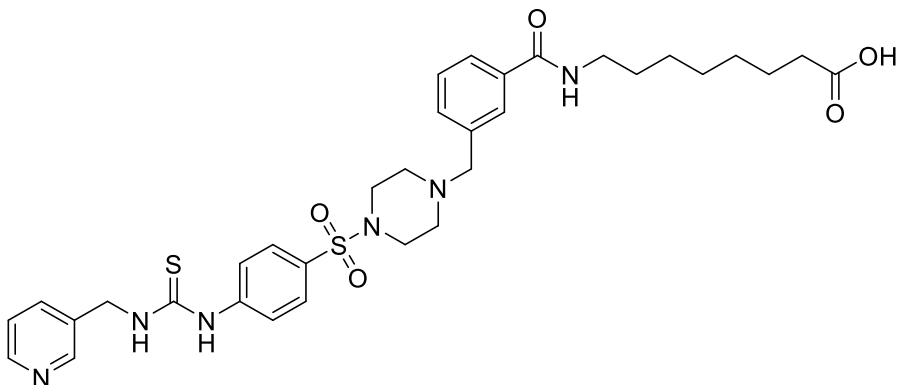

**8-(3-((4-((4-(3-(Pyridin-3-ylmethyl)thioureido)phenyl)sulfonyl)piperazin-1-yl)methyl)benz-amido)octanoic acid (9j)** White solid, 21%. <sup>1</sup>H NMR (600 MHz, DMSO-*d*<sub>6</sub>)  $\delta$ : 11.97 (s, 1H), 10.35 (s, 1H), 8.78 (s, 1H), 8.47 (s, 1H), 8.40 (t, *J* = 5.2 Hz, 1H), 7.83 (d, *J* = 8.5 Hz, 2H), 7.77 (d, *J* = 7.8 Hz, 1H), 7.69–7.75 (m, 2H), 7.65 (d, *J* = 8.7 Hz, 2H), 7.34–7.43 (m, 2H), 7.79 (d, *J* = 5.4 Hz, 2H), 3.60 (s, 2H), 3.32 (q, *J* = 6.3 Hz, 2H), 2.91 (s, 4H), 2.50–2.68 (m, 4H), 2.18 (t, *J* = 7.0 Hz, 2H), 1.43–1.53 (m, 4H), 1.25–1.29 (m, 8H).

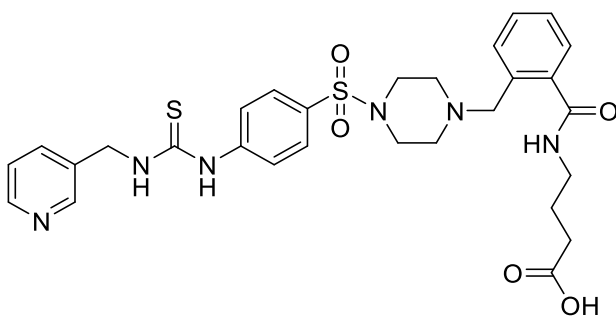

**4-(2-((4-((4-(3-(Pyridin-3-ylmethyl)thioureido)phenyl)sulfonyl)piperazin-1-yl)methyl)benz-amido)butanoic acid (9k)** White solid, 28%. <sup>1</sup>H NMR (600 MHz, DMSO-*d*<sub>6</sub>)  $\delta$ : 10.75 (s, 1H), 9.27 (s, 1H), 8.56 (d, *J* = 1.6 Hz, 1H), 8.49 (t, *J* = 11.0, 5.7 Hz, 1H), 8.46 (dd, *J* = 4.6, 1.1 Hz, 1H), 7.84 (d, *J* = 8.6 Hz, 2H), 7.76 (d, *J* = 7.9 Hz, 1H), 7.71 (d, *J* = 8.7 Hz, 2H), 7.25–7.39 (m, 5H), 4.78 (d, *J* = 4.4 Hz, 2H), 3.54 (s, 2H), 3.30 (q, *J* = 6.5 Hz, 2H), 2.84 (s, 4H), 2.39 (s, 4H), 2.16 (t, *J* = 7.3 Hz, 2H), 1.56–1.63 (m, 2H).

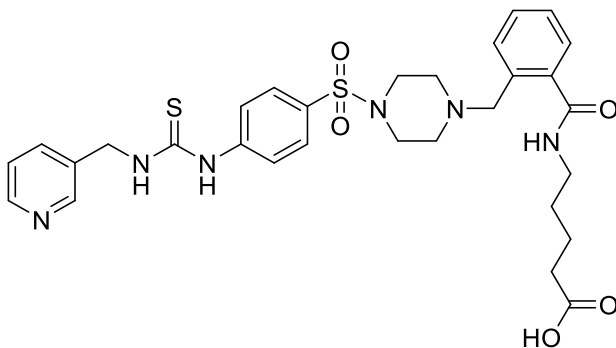

**5-(2-((4-((4-(3-(Pyridin-3-ylmethyl)thioureido)phenyl)sulfonyl)piperazin-1-yl)methyl)benz-amido)pentanoic acid (9l)** White solid, 18%. <sup>1</sup>H NMR (600 MHz, DMSO-*d*<sub>6</sub>)  $\delta$ : 12.05 (s, 1H), 10.23 (s, 1H),

8.66 (s, 2H), 8.57 (d,  $J = 1.7$  Hz, 1H), 8.44–8.50 (m, 1H), 7.85 (d,  $J = 8.6$  Hz, 2H), 7.78 (d,  $J = 7.6$  Hz, 1H), 7.66 (d,  $J = 8.6$  Hz, 2H), 7.33–7.55 (m, 5H), 4.79 (d,  $J = 5.3$  Hz, 2H), 3.6–4.15 (m, 2H), 3.16 (s, 3H), 2.60–3.10 (m, 6H), 2.22 (t,  $J = 7.0$  Hz, 2H), 1.34–1.60 (m, 5H).

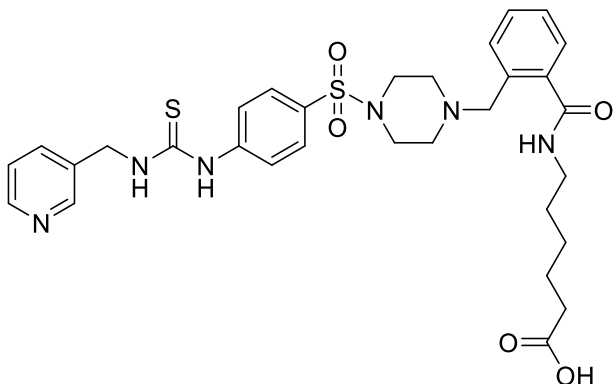

**6-(2-((4-((4-(3-(Pyridin-3-ylmethyl)thioureido)phenyl)sulfonyl)piperazin-1-yl)methyl)benz-amido)hexanoic acid (9m)** White solid, 29%.  $^1\text{H NMR}$  (600 MHz,  $\text{DMSO-}d_6$ )  $\delta$ : 10.20 (s, 1H), 8.67 (s, 1H), 8.54 (d,  $J = 1.5$  Hz, 1H), 8.44 (dd,  $J = 4.7, 1.3$  Hz, 1H), 7.79 (s, 1H), 7.78 (s, 1H), 7.69–7.76 (m, 2H), 7.62 (s, 1H), 7.61 (s, 1H), 7.43–7.48 (m, 1H), 7.33–7.38 (m, 4H), 4.75 (d,  $J = 5.5$  Hz, 2H), 3.88 (s, 4H), 3.02–3.30 (m, 4H), 2.76–3.10 (m, 8H), 2.65 (s, 4H).

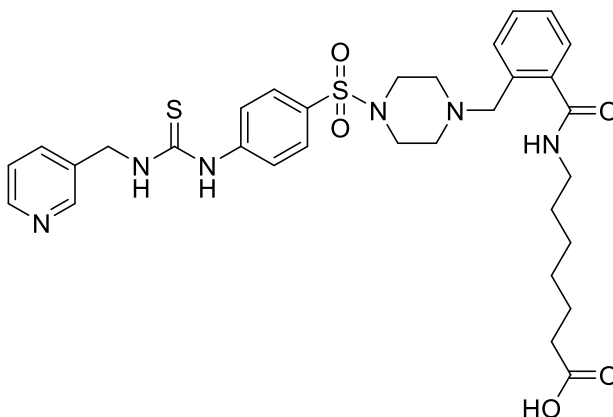

**7-(2-((4-((4-(3-(Pyridin-3-ylmethyl)thioureido)phenyl)sulfonyl)piperazin-1-yl)methyl)benz-amido)heptanoic acid (9n)** White solid, 18%.  $^1\text{H NMR}$  (600 MHz,  $\text{DMSO-}d_6$ )  $\delta$ : 12.00 (s, 1H), 10.34 (s, 1H), 8.73 (s, 1H), 8.52–8.60 (m, 2H), 8.47 (dd,  $J = 4.7, 1.3$  Hz, 1H), 7.86 (d,  $J = 8.4$  Hz, 2H), 7.75–7.78 (m, 1H), 7.63 (d,  $J = 8.7$  Hz, 2H), 7.27–7.41 (m, 4H), 4.79 (d,  $J = 5.9$  Hz, 2H), 3.56 (s, 2H), 3.05 (d,  $J = 4.2$  Hz, 2H), 2.84 (s, 4H), 2.43 (s, 4H), 2.19 (t,  $J = 7.4$  Hz, 2H), 1.43–1.49 (m, 2H), 1.29–1.38 (m, 2H), 1.17–1.23 (m, 4H).

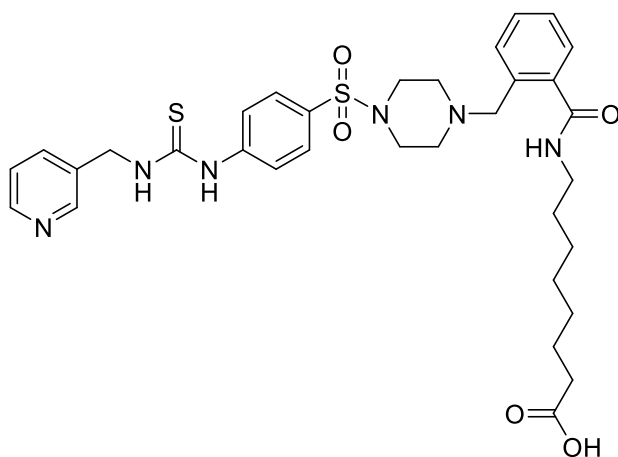

**8-(2-((4-((4-(3-(Pyridin-3-ylmethyl)thioureido)phenyl)sulfonyl)piperazin-1-yl)methyl)benz-amido)octanoic acid (9o)** White solid, 29%. <sup>1</sup>H NMR (DMSO-*d*<sub>6</sub>, 600MHz)  $\delta$ : 11.95 (s, 1H), 10.38 (s, 1H), 8.53–8.83 (m, 3H), 8.48 (dd, *J* = 1.2 Hz, 4.6 Hz, 1H), 7.88 (d, *J* = 8.0 Hz, 2H), 7.77 (d, *J* = 8.0 Hz, 1H), 7.64 (d, *J* = 8.6 Hz, 2H), 7.25–7.54 (m, 5H), 4.79 (d, *J* = 5.6 Hz, 2H), 3.57 (s, 2H), 2.98–3.28 (m, 4H), 2.64–2.96 (m, 4H), 2.28–2.48 (m, 2H), 2.19 (t, *J* = 7.6 Hz, 2H), 1.45–1.51 (m, 2H), 1.37 (s, 2H), 1.19–1.28 (m, 6H).

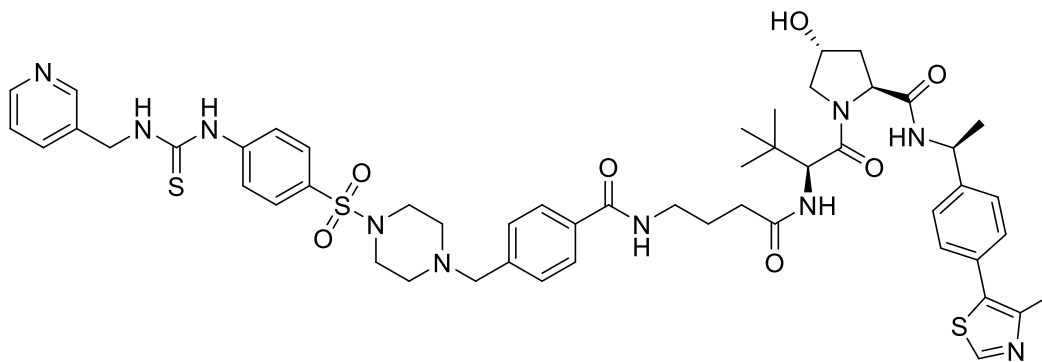

**(2*S*,4*R*)-1-((*S*)-3,3-Dimethyl-2-(4-(4-((4-(3-(pyridin-3-ylmethyl)thioureido)phenyl)sulfonyl)piperazin-1-yl)methyl)benz-amido)butanamido)butanoyl)-4-hydroxy-*N*-((*S*)-1-(4-(4-methylthiazol-5-yl)phenyl)ethyl)pyrrolidine-2-carboxamide (A1)**. The compound **9a** (25 mg, 0.04 mmol), VHL ligand (18 mg, 0.04 mmol), HATU (30 mg, 0.08 mmol), DIPEA (10 mg, 0.08 mmol) were dissolved in dry DMF (5 mL) and then the mixture was stirred at room temperature for 6 h. The mixture was poured saturated NaCl solution (20 mL) and then extracted with ethyl acetate (10 mL  $\times$  3). The organic phases were combined and washed with of saturated NaCl solution (10 mL). After dried over sodium sulfate, it was concentrated and purified by silica gel column chromatography (dichloromethane/methanol=100/3) to obtain 80 mg of white solid (11 mg, yield 26%, purity 99.5%). <sup>1</sup>H NMR (600 MHz, DMSO-*d*<sub>6</sub>)  $\delta$ : 10.13 (s, 1H), 8.96 (s, 1H), 8.62 (s, 1H), 8.56 (s, 1H), 8.46 (d, *J* = 4.1 Hz, 1H), 8.31–8.36 (m, 2H), 7.73–7.80 (m, 7H), 7.63 (d, *J* = 4.4 Hz, 2H), 7.41 (d, *J* = 3.8 Hz, 2H), 7.35–7.37 (m, 3H), 7.29 (d, *J* = 3.9 Hz, 2H), 5.05–5.10 (m, 1H), 4.88–4.93 (m, 1H), 4.78 (d, *J* = 5.0 Hz, 2H), 4.49 (d, *J* = 9.1 Hz, 1H), 4.40 (t, *J* = 7.9 Hz, 1H), 4.26 (s, 1H), 3.56–3.61 (m, 2H), 3.51 (s, 2H), 3.16–3.21 (m, 2H), 2.83–2.93 (m, 4H), 2.40–2.47 (m, 6H), 2.19–2.26 (m, 1H), 2.08–2.13 (m, 1H), 1.97–2.02 (m, 1H), 1.75–1.80 (m, 1H), 1.35 (d, *J* = 6.8 Hz, 3H), 1.22–1.27 (m, 2H), 0.90 (s, 9H);

$^{13}\text{C}$  NMR (150 MHz, DMSO- $d_6$ )  $\delta$ : 181.22, 172.46, 171.07, 170.07, 166.29, 151.88, 149.39, 148.65, 148.21, 145.08, 144.49, 135.75, 134.61, 134.08, 131.56, 130.15, 129.26, 128.98, 128.86, 127.57, 126.83, 123.88, 121.95, 69.22, 61.31, 59.00, 56.82, 56.68, 51.89, 48.14, 46.29, 45.18, 38.16, 35.60, 35.36, 29.36, 26.89, 26.65, 25.67, 22.84, 16.42; HRMS (ESI, positive)  $m/z$  calcd for  $\text{C}_{52}\text{H}_{65}\text{N}_{10}\text{O}_7\text{S}_3$  (M+H) $^+$  1037.4194, found 1037.4211.

The synthetic routes of **A2–5**, **B1–5** and **C1–5** were similar to that of **A1**.

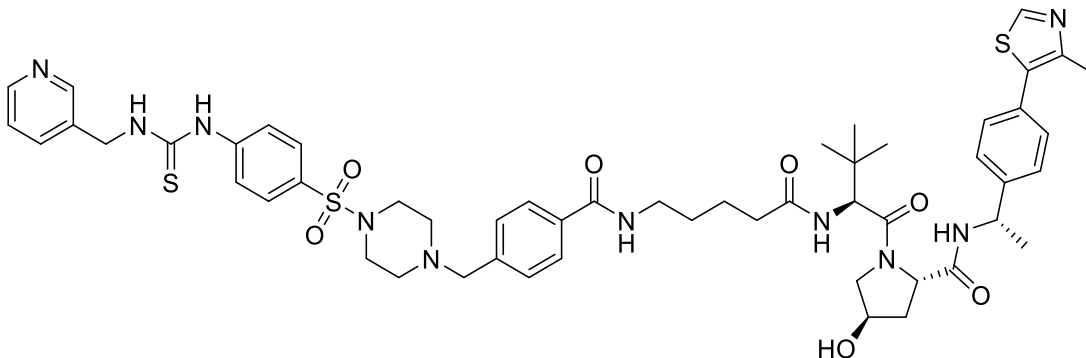

**(2S,4R)-1-((S)-3,3-Dimethyl-2-(5-(4-((4-(3-(pyridin-3-ylmethyl)thioureido)phenyl)sulfon-yl)piperazin-1-yl)methyl)benzamido)pentanamido)butanoyl)-4-hydroxy-N-((S)-1-(4-(4-methylthiazol-5-yl)phenyl)ethyl)pyrrolidine-2-carboxamide (A2)** White solid, yield 21%, purity 99.0%.  $^1\text{H}$  NMR (600 MHz, DMSO- $d_6$ )  $\delta$ : 10.18 (s, 1H), 8.99 (s, 1H), 8.67 (s, 1H), 8.59 (s, 1H), 8.49 (d,  $J$  = 3.6 Hz, 1H), 8.40 (s, 1H), 8.37 (d,  $J$  = 7.9 Hz, 1H), 7.74–7.86 (m, 6H), 7.66 (d,  $J$  = 8.7 Hz, 2H), 7.33–7.45 (m, 7H), 5.10 (s, 1H), 4.93 (t,  $J$  = 7.6 Hz, 1H), 4.81 (d,  $J$  = 5.4 Hz, 2H), 4.51 (d,  $J$  = 9.1 Hz, 1H), 4.43 (t,  $J$  = 8.0 Hz, 1H), 4.29 (s, 1H), 3.60–3.65 (m, 2H), 3.20–3.27 (m, 3H), 2.76–3.02 (m, 4H), 2.52–2.56 (m, 2H), 2.46 (s, 3H), 2.25–2.31 (m, 1H), 2.12–2.17 (m, 1H), 1.99–2.03 (m, 1H), 1.76–1.82 (m, 1H), 1.43–1.56 (m, 5H), 1.38 (d,  $J$  = 7.0 Hz, 3H), 1.24–1.26 (m, 2H), 0.93 (s, 9H);  $^{13}\text{C}$  NMR (150 MHz,  $\text{CD}_3\text{OD}$ )  $\delta$ : 181.84, 174.38, 171.82, 170.93, 168.50, 151.42, 148.11, 147.68, 147.31, 144.22, 143.91, 141.81, 140.66, 136.45, 135.17, 133.59, 131.93, 130.13, 129.09, 129.01, 128.42, 128.03, 126.98, 126.22, 125.92, 125.33, 123.77, 122.20, 117.29, 110.23, 69.57, 61.32, 59.17, 57.73, 56.55, 51.73, 48.74, 45.71, 44.81, 39.10, 37.36, 35.10, 34.76, 28.55, 25.67, 22.97, 20.99, 14.41; HRMS (ESI, positive)  $m/z$  calcd for  $\text{C}_{53}\text{H}_{67}\text{N}_{10}\text{O}_7\text{S}_3$  (M+H) $^+$  1051.4351, found 1051.4334.

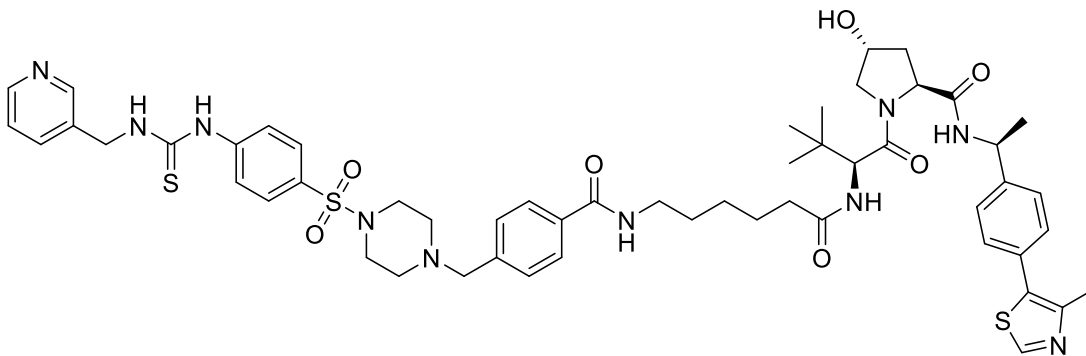

**(2S,4R)-1-((S)-3,3-Dimethyl-2-(6-(4-((4-(3-(pyridin-3-ylmethyl)thioureido)phenyl)sulfon-yl)piperazin-1-yl)methyl)benzamido)hexanamido)butanoyl)-4-hydroxy-N-((S)-1-(4-(4-methylthiazol-5-**

**yl)phenyl)ethyl)pyrrolidine-2-carboxamide (A3)** White solid, yield 26%, purity 99.0%. <sup>1</sup>H NMR (600 MHz, DMSO-*d*<sub>6</sub>)  $\delta$ : 10.09 (s, 1H), 8.97 (s, 1H), 8.60 (s, 1H), 8.56 (d, *J* = 1.9 Hz, 1H), 8.44–8.48 (m, 1H), 8.29–8.36 (m, 2H), 7.72–7.80 (m, 6H), 7.63 (d, *J* = 8.8 Hz, 2H), 7.41–7.43 (m, 2H), 7.35–7.38 (m, 3H), 7.29 (d, *J* = 8.1 Hz, 2H), 5.06 (d, *J* = 3.6 Hz, 1H), 4.88–4.92 (m, 1H), 4.78 (d, *J* = 5.4 Hz, 2H), 4.49 (d, *J* = 9.4 Hz, 1H), 4.41 (t, *J* = 8.1 Hz, 1H), 4.25–4.29 (m, 1H), 3.60–3.56 (m, 2H), 3.49 (s, 2H), 3.17–3.23 (m, 2H), 2.81–2.93 (m, 4H), 2.40 (s, 3H), 2.39–2.43 (m, 4H), 2.20–2.26 (m, 1H), 2.09–2.13 (m, 1H), 1.98–2.01 (m, 1H), 1.76–1.81 (m, 1H), 1.44–1.51 (m, 4H), 1.36 (d, *J* = 6.9 Hz, 3H), 0.91 (s, 9H), 0.85 (t, *J* = 7.2 Hz, 1H); <sup>13</sup>C NMR (150 MHz, DMSO-*d*<sub>6</sub>)  $\delta$ : 181.21, 172.48, 171.09, 170.08, 166.30, 151.93, 149.38, 148.66, 148.21, 145.11, 144.52, 135.77, 131.57, 130.15, 129.28, 128.89, 127.59, 126.84, 123.91, 121.93, 69.22, 61.29, 59.00, 56.82, 56.71, 51.88, 48.15, 46.29, 45.17, 38.18, 35.62, 35.36, 29.38, 26.90, 26.66, 25.69, 22.88, 16.44; HRMS (ESI, positive) *m/z* calcd for C<sub>54</sub>H<sub>69</sub>N<sub>10</sub>O<sub>7</sub>S<sub>3</sub> (M+H)<sup>+</sup> 1065.4507, found 1065.4521.

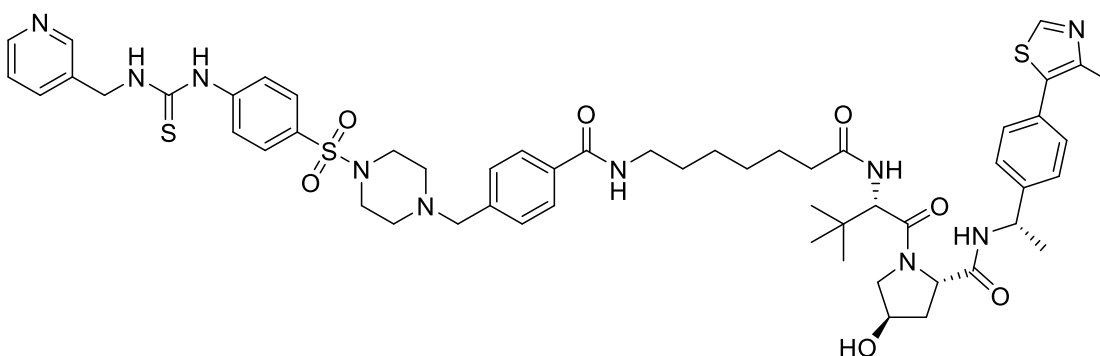

**(2*S*,4*R*)-1-((*S*)-3,3-dimethyl-2-(7-(4-((4-((4-(3-(pyridin-3-ylmethyl)thioureido)phenyl)sulfon-yl)pi-perazin-1-yl)methyl)benzamido)heptanamido)butanoyl)-4-hydroxy-*N*-((*S*)-1-(4-(4-methylthiazol-5-yl)phenyl)ethyl)pyrrolidine-2-carboxamide (A4)** White solid, yield 17%, purity 98.9%. <sup>1</sup>H NMR (600 MHz, DMSO-*d*<sub>6</sub>)  $\delta$ : 10.46 (s, 1H), 8.99 (s, 1H), 8.85 (s, 1H), 8.59 (s, 1H), 8.49 (d, *J* = 4.0 Hz, 1H), 8.35–8.40 (m, 2H), 7.83–7.90 (m, 2H), 7.76–7.81 (m, 4H), 7.65 (d, *J* = 8.7 Hz, 2H), 7.43–7.45 (m, 2H), 7.36–7.39 (m, 3H), 7.32 (d, *J* = 7.6 Hz, 2H), 5.10 (d, *J* = 3.0 Hz, 1H), 4.92 (t, *J* = 7.2 Hz, 1H), 4.80 (d, *J* = 5.1 Hz, 2H), 4.51 (d, *J* = 9.4 Hz, 1H), 4.44 (t, *J* = 8.1 Hz, 1H), 4.26–4.31 (m, 1H), 3.60–3.62 (m, 2H), 3.52 (s, 2H), 3.18–3.25 (m, 2H), 3.11–3.15 (s, 1H), 2.74–3.00 (m, 4H), 2.40–2.49 (m, 7H), 2.22–2.27 (m, 1H), 2.07–2.15 (m, 1H), 1.98–2.04 (m, 1H), 1.74–1.83 (m, 1H), 1.45–1.52 (m, 4H), 1.38 (d, *J* = 3.9 Hz, 3H), 1.18 (t, *J* = 7.2 Hz, 1H), 0.94 (s, 9H), 0.85–0.87 (m, 1H); <sup>13</sup>C NMR (150 MHz, DMSO-*d*<sub>6</sub>)  $\delta$ : 181.26, 172.49, 171.07, 170.08, 166.13, 151.89, 149.11, 148.41, 148.21, 135.98, 134.76, 131.56, 130.14, 129.26, 128.86, 127.72, 126.83, 124.00, 121.72, 69.20, 58.99, 56.81, 56.68, 53.90, 48.14, 45.00, 38.16, 35.61, 35.31, 29.48, 28.88, 26.90, 26.70, 25.83, 18.49, 17.18, 16.42; HRMS (ESI, positive) *m/z* calcd for C<sub>56</sub>H<sub>71</sub>N<sub>10</sub>O<sub>7</sub>S<sub>3</sub> (M+H)<sup>+</sup> 1079.4664, found 1079.4675.

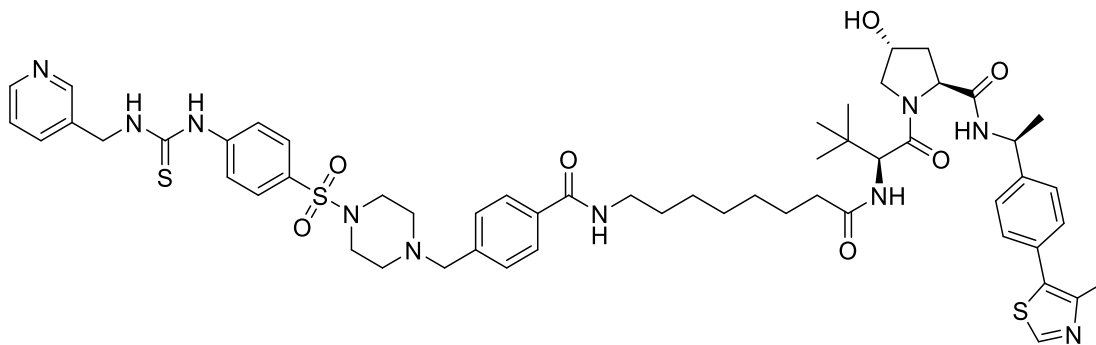

**(2S,4R)-1-((S)-3,3-Dimethyl-2-(8-(4-((4-((4-(3-(pyridin-3-ylmethyl)thioureido)phenyl)sulfon-yl)piperazin-1-yl)methyl)benzamido)octanamido)butanoyl)-4-hydroxy-N-((S)-1-(4-(4-methylthiazol-5-yl)phenyl)ethyl)pyrrolidine-2-carboxamide (A5)** White solid, yield 23%, purity 95.2%.  $^1\text{H}$  NMR (600 MHz, DMSO- $d_6$ )  $\delta$ : 10.17 (s, 1H), 8.98 (s, 1H), 8.68 (s, 1H), 8.57 (s, 1H), 8.47 (d,  $J = 3.8$  Hz, 1H), 8.33-8.38 (m, 2H), 7.73-7.81 (m, 6H), 7.64 (d,  $J = 8.2$  Hz, 2H), 7.36-7.44 (m, 5H), 7.27-7.31 (m, 2H), 5.09 (s, 1H), 4.91 (t,  $J = 6.8$  Hz, 1H), 4.79 (s, 2H), 4.51 (d,  $J = 9.5$  Hz, 1H), 4.42 (t,  $J = 7.8$  Hz, 1H), 4.27 (s, 1H), 4.03–4.14 (m, 1H), 3.59 (s, 2H), 3.49 (s, 2H), 3.13–3.27 (m, 5H), 2.88 (s, 4H), 2.45 (s, 3H), 2.42 (s, 4H), 2.21–2.27 (m, 1H), 2.07–2.13 (m, 1H), 1.96–2.03 (m, 1H), 1.75–1.81 (m, 1H), 1.44–1.50 (m, 4H), 1.37 (d,  $J = 7.0$  Hz, 1H), 1.22–1.24 (m, 2H), 0.92 (s, 9H);  $^{13}\text{C}$  NMR (150 MHz, DMSO- $d_6$ )  $\delta$ : 181.20, 172.50, 171.07, 170.07, 166.33, 151.89, 149.42, 148.66, 148.20, 145.08, 144.48, 141.30, 135.72, 134.61, 134.02, 131.55, 130.14, 129.26, 129.03, 128.89, 127.54, 126.82, 123.87, 121.93, 69.20, 61.39, 58.99, 56.79, 56.68, 51.93, 49.04, 48.13, 46.38, 45.18, 38.16, 35.61, 35.32, 29.57, 29.07, 28.95, 26.88, 25.82, 22.84, 16.42; HRMS (ESI, positive)  $m/z$  calcd for  $\text{C}_{56}\text{H}_{73}\text{N}_{10}\text{O}_7\text{S}_3$  ( $\text{M}+\text{H}$ ) $^+$  1093.4820, found 1093.4848.

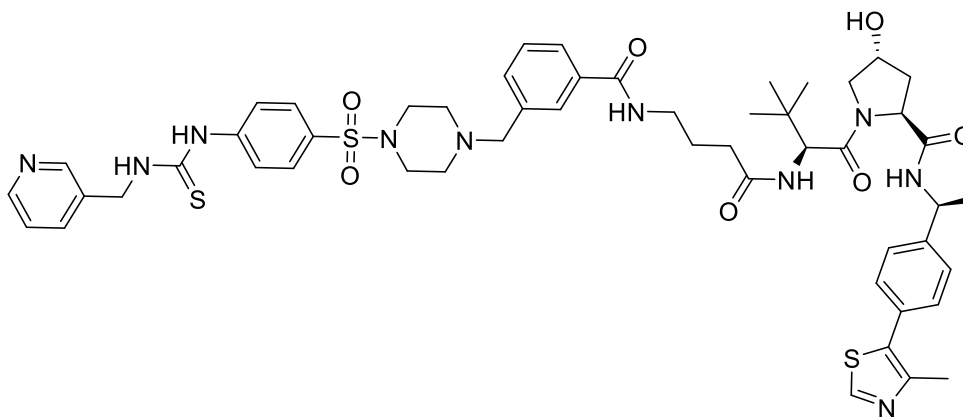

**(2S,4R)-1-((S)-3,3-Dimethyl-2-(4-(3-((4-((4-(3-(pyridin-3-ylmethyl)thioureido)phenyl)sulfon-yl)piperazin-1-yl)methyl)benzamido)butanamido)butanoyl)-4-hydroxy-N-((S)-1-(4-(4-methylthiazol-5-yl)phenyl)ethyl)pyrrolidine-2-carboxamide (B1)** White solid, yield 25%, purity 100%.  $^1\text{H}$  NMR (600 MHz, DMSO- $d_6$ )  $\delta$ : 10.42 (s, 1H), 8.98 (s, 1H), 8.74–8.86 (m, 1H), 8.57 (s, 1H), 8.47 (d,  $J = 4.4$  Hz, 1H), 8.44 (t,  $J = 4.5$  Hz, 1H), 8.39 (d,  $J = 7.9$  Hz, 1H), 7.89 (d,  $J = 9.1$  Hz, 1H), 7.82-7.86 (m, 2H), 7.77 (d,  $J = 7.9$  Hz, 1H), 7.67–7.73 (m, 2H), 7.63 (d,  $J = 8.3$  Hz, 2H), 7.43 (d,  $J = 8.0$  Hz, 1H), 7.35–7.40 (m, 5H), 5.12 (d,  $J = 2.9$  Hz, 1H), 4.91 (t,  $J = 6.8$  Hz, 1H), 4.79 (d,  $J = 5.2$  Hz, 2H), 4.52 (d,  $J = 9.1$  Hz, 1H), 4.42 (t,  $J = 8.0$  Hz,

1H), 4.25–4.31 (m, 1H), 3.56–3.65 (m, 2H), 3.50 (s, 2H), 3.19–3.24 (m, 2H), 2.88 (s, 4H), 2.45 (s, 3H), 2.37–2.44 (m, 4H), 2.26–2.32 (m, 1H), 2.16–2.21 (m, 1H), 2.00–2.02 (m, 1H), 1.69–1.75 (m, 2H), 1.62 (s, 1H), 1.36 (d,  $J = 7.0$  Hz, 3H), 0.93 (s, 9H);  $^{13}\text{C}$  NMR (150 MHz, DMSO- $d_6$ )  $\delta$ : 181.22, 172.26, 171.06, 170.01, 166.53, 151.92, 149.36, 148.64, 148.20, 145.10, 144.56, 135.69, 135.04, 134.62, 131.87, 131.56, 130.13, 129.26, 128.84, 128.60, 128.02, 126.82, 126.36, 123.89, 121.75, 69.21, 61.64, 58.99, 56.93, 56.69, 51.92, 48.14, 46.34, 45.05, 38.16, 35.65, 33.10, 26.90, 22.87, 16.42; HRMS (ESI, positive)  $m/z$  calcd for  $\text{C}_{52}\text{H}_{65}\text{N}_{10}\text{O}_7\text{S}_3$  ( $\text{M}+\text{H}$ ) $^+$  1037.4194, found 1037.4192.

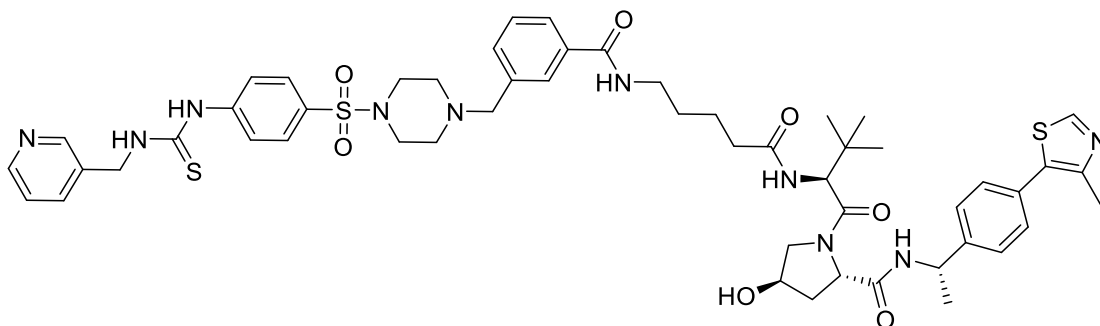

**(2*S*,4*R*)-1-((*S*)-3,3-Dimethyl-2-(5-(3-((4-((4-(3-(pyridin-3-ylmethyl)thioureido)phenyl)sulfonyl)piperazin-1-yl)methyl)benzamido)pentanamido)butanoyl)-4-hydroxy-*N*-((*S*)-1-(4-(4-methylthiazol-5-yl)phenyl)ethyl)pyrrolidine-2-carboxamide (B2)** White solid, yield 20%, purity 99.4%.  $^1\text{H}$  NMR (600 MHz, DMSO- $d_6$ )  $\delta$ : 10.17 (s, 1H), 8.66 (s, 1H), 8.58 (s, 1H), 8.48 (d,  $J = 4.5$  Hz, 1H), 8.3–8.41 (m, 2H), 7.81 (d,  $J = 8.7$  Hz, 3H), 7.78 (d,  $J = 7.8$  Hz, 1H), 7.75 (d,  $J = 8.2$  Hz, 2H), 7.66 (s, 1H), 7.65 (s, 1H), 7.37–7.45 (m, 5H), 7.30 (d,  $J = 8.1$  Hz, 2H), 5.13 (d,  $J = 3.5$  Hz, 1H), 4.88–4.95 (m, 1H), 4.80 (d,  $J = 5.2$  Hz, 2H), 4.51 (d,  $J = 9.3$  Hz, 1H), 4.43 (t,  $J = 8.2$  Hz, 1H), 4.26–4.30 (m, 1H), 3.58–3.63 (m, 1H), 3.51 (s, 2H), 3.19–3.24 (m, 2H), 2.82–2.96 (m, 4H), 2.45 (s, 3H), 2.41–2.45 (m, 4H), 2.22–2.28 (m, 1H), 2.09–2.15 (m, 1H), 1.96–2.05 (m, 2H), 1.77–1.83 (m, 1H), 1.47–1.53 (m, 4H), 1.38 (d, 3H), 0.92 (s, 9H), 0.82–0.89 (m, 1H);  $^{13}\text{C}$  NMR (150 MHz, DMSO- $d_6$ )  $\delta$ : 181.20, 172.54, 171.10, 170.08, 166.36, 151.94, 149.38, 148.67, 148.21, 145.10, 144.16, 141.33, 135.76, 134.64, 133.97, 131.58, 130.15, 129.28, 128.93, 127.56, 126.84, 126.72, 123.92, 121.97, 69.22, 61.39, 59.01, 56.84, 56.71, 51.93, 48.16, 46.40, 45.18, 40.48, 38.16, 35.61, 35.36, 26.89, 25.68, 22.87, 16.43; HRMS (ESI, positive)  $m/z$  calcd for  $\text{C}_{53}\text{H}_{67}\text{N}_{10}\text{O}_7\text{S}_3$  ( $\text{M}+\text{H}$ ) $^+$  1051.4351, found 1051.4346.

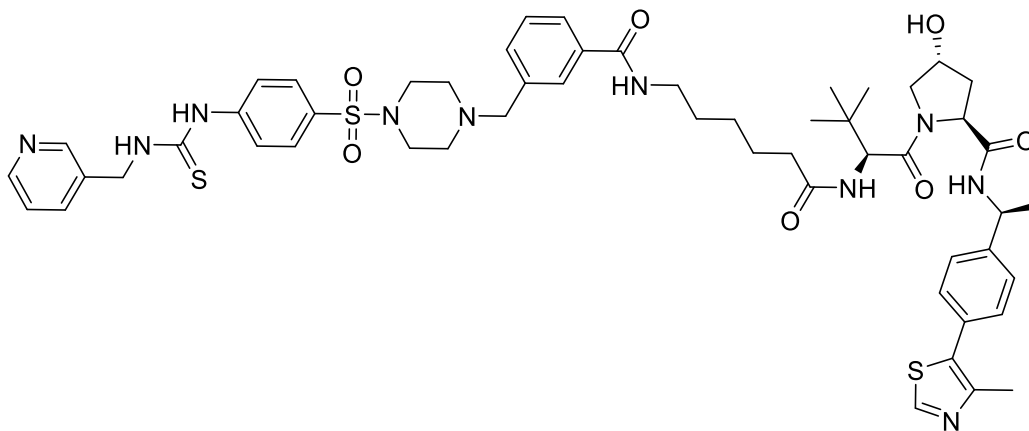



**(2*S*,4*R*)-1-((*S*)-3,3-Dimethyl-2-(6-(3-((4-((4-(3-(pyridin-3-ylmethyl)thioureido)phenyl)sulfonyl)piperazin-1-yl)methyl)benzamido)hexanamido)butanoyl)-4-hydroxy-*N*-((*S*)-1-(4-(4-methylthiazol-5-yl)phenyl)ethyl)pyrrolidine-2-carboxamide (B3)** White solid, yield 21%, purity 97.1%. <sup>1</sup>H NMR (600 MHz, DMSO-*d*<sub>6</sub>)  $\delta$ : 10.29 (s, 1H), 8.98 (s, 1H), 8.73 (s, 1H), 8.58 (s, 1H), 8.47 (d, *J* = 3.8 Hz, 1H), 8.36–8.40 (m, 2H), 7.71–7.89 (m, 6H), 7.62–7.66 (m, 2H), 7.42–7.44 (m, 2H), 7.35–7.40 (m, 4H), 7.30 (d, *J* = 8.3 Hz, 2H), 5.10 (s, 1H), 4.89–4.94 (m, 1H), 4.79 (d, *J* = 5.4 Hz, 2H), 4.50 (d, *J* = 9.2 Hz, 1H), 4.42 (t, *J* = 8.3 Hz, 1H), 4.27 (s, 1H), 3.56–3.63 (m, 2H), 3.50 (s, 2H), 3.20–3.24 (m, 2H), 2.79–2.94 (m, 4H), 2.45 (s, 3H), 2.40–2.44 (m, 4H), 2.24–2.30 (m, 1H), 2.11–2.16 (m, 1H), 1.95–2.03 (m, 2H), 1.76–1.82 (m, 1H), 1.45–1.55 (m, 4H), 1.37 (d, *J* = 7.1 Hz, 3H), 0.93 (s, 9H), 0.84–0.86 (m, 1H); <sup>13</sup>C NMR (150 MHz, DMSO-*d*<sub>6</sub>)  $\delta$ : 181.23, 172.42, 171.08, 170.07, 166.36, 151.93, 149.41, 148.68, 148.22, 145.11, 144.54, 141.37, 135.73, 134.63, 133.99, 131.57, 130.16, 129.28, 128.92, 127.56, 126.85, 124.23, 123.90, 121.85, 119.22, 110.59, 69.23, 61.40, 59.02, 56.85, 56.71, 55.37, 51.96, 48.15, 46.40, 45.14, 39.38, 38.17, 35.65, 35.13, 29.33, 26.92, 23.53, 22.88, 16.44; HRMS (ESI, positive) *m/z* calcd for C<sub>54</sub>H<sub>69</sub>N<sub>10</sub>O<sub>7</sub>S<sub>3</sub> (M+H)<sup>+</sup> 1065.4507, found 1065.4492.

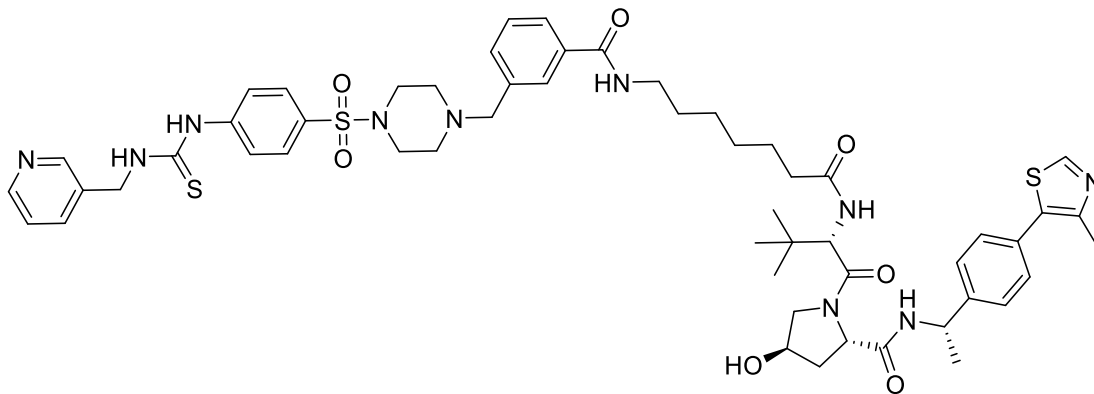

**(2*S*,4*R*)-1-((*S*)-3,3-Dimethyl-2-(7-(3-((4-((4-(3-(pyridin-3-ylmethyl)thioureido)phenyl)sulfonyl)piperazin-1-yl)methyl)benzamido)heptanamido)butanoyl)-4-hydroxy-*N*-((*S*)-1-(4-(4-methylthiazol-5-yl)phenyl)ethyl)pyrrolidine-2-carboxamide (B4)** White solid, yield 26%, purity 97.4%. <sup>1</sup>H NMR (600 MHz, DMSO-*d*<sub>6</sub>)  $\delta$ : 10.19 (s, 1H), 8.99 (s, 1H), 8.68 (s, 1H), 8.58 (s, 1H), 8.48 (d, *J* = 4.6 Hz, 1H), 8.36–8.42 (m, 2H), 7.76–7.82 (m, 4H), 7.64–7.71 (m, 4H), 7.44 (d, *J* = 7.9 Hz, 2H), 7.35–7.41 (m, 5H), 5.12 (d, *J* = 3.2 Hz, 1H), 4.88–4.94 (m, 1H), 4.80 (d, *J* = 5.4 Hz, 2H), 4.52 (d, *J* = 9.4 Hz, 1H), 4.43 (t, *J* = 8.0 Hz, 1H), 4.29 (s, 1H), 3.60–3.63 (m, 2H), 3.50 (s, 3H), 3.18–3.25 (m, 2H), 2.83–2.96 (m, 4H), 2.46 (s, 3H), 2.40–2.45 (m, 4H), 2.22–2.30 (m, 1H), 2.09–2.15 (m, 1H), 1.99–2.03 (m, 1H), 1.77–1.82 (m, 1H), 1.40–1.61 (m, 6H), 1.37 (d, *J* = 7.1 Hz, 3H), 0.94 (s, 9H), 0.86 (s, *J* = 7.1 Hz, 1H); <sup>13</sup>C NMR (600 MHz, DMSO-*d*<sub>6</sub>)  $\delta$ : 181.19, 172.52, 171.07, 170.07, 166.45, 151.92, 149.38, 148.65, 148.20, 145.10, 144.44, 138.35, 135.73, 135.12, 134.62, 131.81, 131.56, 130.13, 129.26, 128.87, 128.58, 127.99, 126.82, 126.31, 123.88, 121.98, 69.20, 61.65, 58.99, 56.81, 56.69, 51.93, 48.14, 46.38, 45.18, 38.16, 35.61, 35.30, 29.48, 28.86, 26.89, 26.71, 25.84, 22.86, 16.42; HRMS (ESI, positive) *m/z* calcd for C<sub>55</sub>H<sub>71</sub>N<sub>10</sub>O<sub>7</sub>S<sub>3</sub> (M+H)<sup>+</sup> 1079.4664, found 1079.4651.

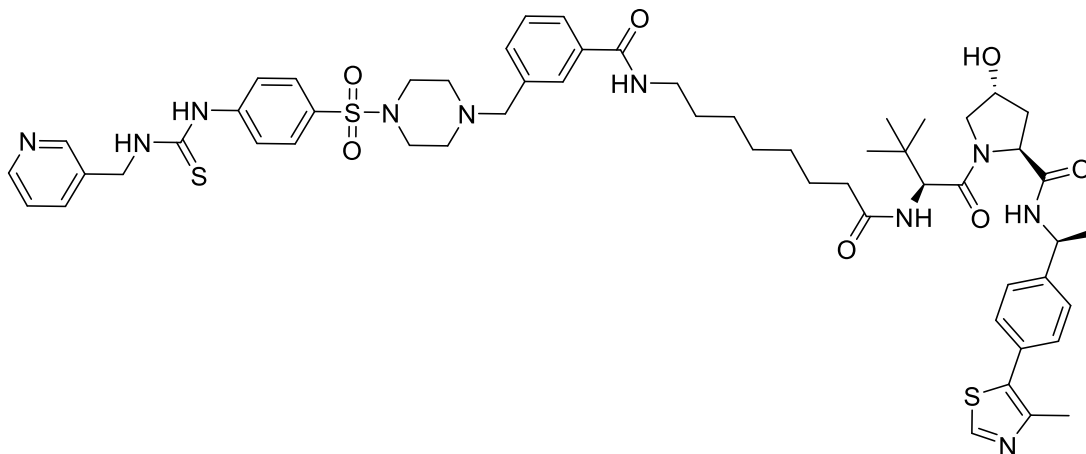

**(2S,4R)-1-((S)-3,3-Dimethyl-2-(8-(3-((4-((4-(3-(pyridin-3-ylmethyl)thioureido)phenyl)sulfonyl)piperazin-1-yl)methyl)benzamido)octanamido)butanoyl)-4-hydroxy-N-((S)-1-(4-(4-methylthiazol-5-yl)phenyl)ethyl)pyrrolidine-2-carboxamide (B5)** White solid, yield 19%, purity 98.9%. <sup>1</sup>H NMR (600 MHz, CD<sub>3</sub>OD)  $\delta$ : 8.88 (s, 1H), 8.59 (d,  $J$  = 1.7 Hz, 1H), 8.46 (dd,  $J$  = 4.8, 1.5 Hz, 1H), 7.90–7.92 (m, 1H), 7.76–7.79 (m, 2H), 7.73 (s, 1H), 7.72 (s, 1H), 7.71 (s, 1H), 7.68–7.70 (m, 1H), 7.40–7.46 (m, 7H), 5.34–5.37 (m, 1H), 5.00 (q,  $J$  = 7.0 Hz, 2H), 4.92 (s, 2H), 4.64 (s, 1H), 4.56–4.58 (m, 2H), 4.42–4.46 (m, 1H), 3.87–3.90 (m, 1H), 3.75 (dd,  $J$  = 10.9, 4.4 Hz, 1H), 3.66 (s, 1H), 3.57 (s, 2H), 3.36 (t,  $J$  = 7.2 Hz, 2H), 3.03 (s, 4H), 2.54 (s, 4H), 2.49 (s, 3H), 2.26–2.31 (m, 2H), 2.20 (t,  $J$  = 7.4 Hz, 2H), 2.02–2.07 (m, 2H), 1.94–1.98 (m, 1H), 1.58–1.65 (m, 6H), 1.50 (d,  $J$  = 7.0 Hz, 1H), 1.04 (s, 9H), 1.02 (s, 1H); <sup>13</sup>C NMR (150 MHz, DMSO-*d*<sub>6</sub>)  $\delta$ : 172.61, 171.09, 170.08, 166.52, 155.30, 149.13, 148.49, 145.35, 145.07, 138.36, 136.02, 135.47, 135.13, 131.79, 131.49, 130.10, 129.31, 129.26, 128.59, 127.92, 126.82, 126.48, 126.30, 123.93, 117.69, 69.19, 61.62, 58.99, 56.82, 56.67, 51.91, 48.15, 40.94, 38.13, 35.60, 35.55, 35.33, 31.70, 29.50, 29.44, 29.24, 29.16, 29.11, 29.05, 28.99, 28.93, 26.98, 26.87, 25.81, 25.54, 22.82, 22.52, 16.40, 14.37; HRMS (ESI, positive)  $m/z$  calcd for C<sub>56</sub>H<sub>73</sub>N<sub>10</sub>O<sub>7</sub>S<sub>3</sub> (M+H)<sup>+</sup> 1093.4820, found 1093.4827.

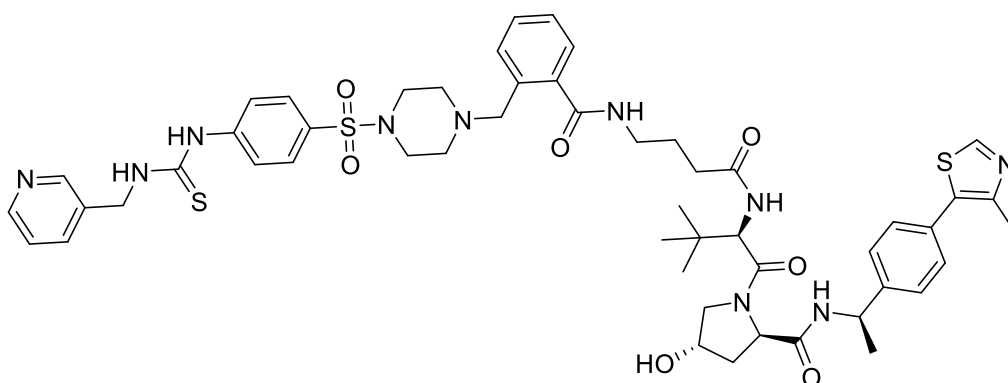

**(2R,4S)-1-((R)-3,3-Dimethyl-2-(4-(2-((4-((4-(3-(pyridin-3-ylmethyl)thioureido)phenyl)sulfonyl)piperazin-1-yl)methyl)benzamido)butanamido)butanoyl)-4-hydroxy-N-((R)-1-(4-(4-methylthiazol-5-yl)phenyl)ethyl)pyrrolidine-2-carboxamide (C1)** White solid, yield 21%, purity 96.7%. <sup>1</sup>H NMR (600 MHz, DMSO-*d*<sub>6</sub>)  $\delta$ : 10.15 (s, 1H), 8.97 (s, 1H), 8.64 (s, 1H), 8.57 (s, 1H), 8.47 (d,  $J$  = 4.6 Hz, 2H), 8.36 (d,

$J = 7.6$  Hz, 1H), 7.76–7.90 (m, 4H), 7.64 (d,  $J = 8.8$  Hz, 2H), 7.41–7.44 (m, 2H), 7.30–7.39 (m, 7H), 5.09–5.15 (m, 1H), 4.92 (t,  $J = 7.1$  Hz, 1H), 4.80 (d,  $J = 5.0$  Hz, 2H), 4.53 (d,  $J = 9.3$  Hz, 1H), 4.44 (t,  $J = 8.2$  Hz, 1H), 4.29 (s, 1H), 3.55–3.65 (m, 4H), 3.07–3.02 (m, 2H), 2.86 (s, 4H), 2.45 (s, 3H), 2.41 (s, 4H), 2.24–2.29 (m, 1H), 2.09–2.15 (m, 1H), 2.00–2.05 (m, 1H), 1.78–1.83 (m, 1H), 1.58–1.64 (m, 2H), 1.37 (d,  $J = 6.9$  Hz, 3H), 0.95 (s, 9H);  $^{13}\text{C}$  NMR (150 MHz, DMSO- $d_6$ )  $\delta$ : 181.19, 172.15, 171.05, 170.04, 168.99, 151.90, 149.39, 148.66, 148.21, 145.09, 144.44, 137.91, 135.73, 135.46, 134.61, 131.56, 130.47, 130.15, 129.65, 129.27, 128.83, 128.39, 127.52, 126.90, 126.83, 123.88, 121.92, 69.23, 59.33, 59.02, 56.99, 56.70, 51.72, 48.16, 46.32, 45.19, 40.89, 40.52, 39.03, 38.18, 35.68, 33.08, 26.91, 26.14, 22.85, 16.42; HRMS (ESI, positive)  $m/z$  calcd for  $\text{C}_{52}\text{H}_{65}\text{N}_{10}\text{O}_7\text{S}_3$  (M+H) $^+$  1037.4194, found 1037.4175.

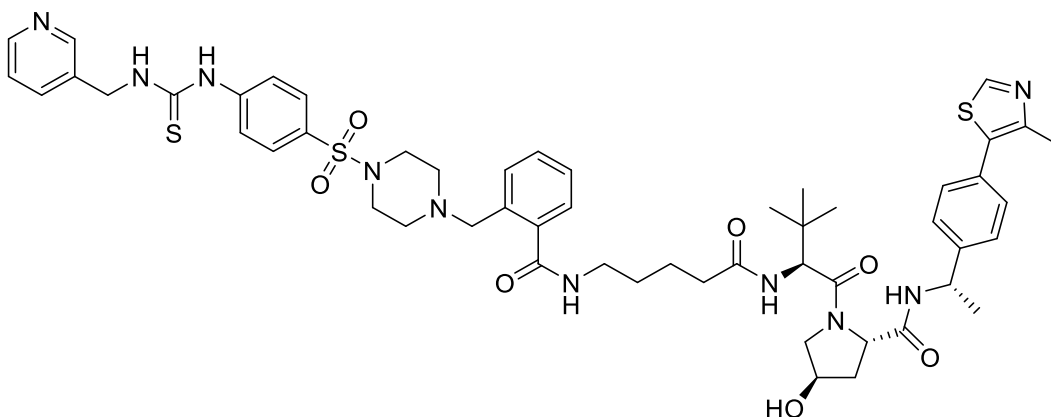

**(2S,4R)-1-((S)-3,3-Dimethyl-2-(5-(2-((4-((4-(3-(pyridin-3-ylmethyl)thioureido)phenyl)sulfon-yl)pi-perazin-1-yl)methyl)benzamido)pentanamido)butanoyl)-4-hydroxy-N-((S)-1-(4-(4-methylthiazol-5-yl)phenyl)ethyl)pyrrolidine-2-carboxamide (C2)** White solid, yield 25%, purity 94.8%.  $^1\text{H}$  NMR (600 MHz, DMSO- $d_6$ )  $\delta$ : 10.29 (s, 1H), 8.98 (s, 1H), 8.74 (s, 1H), 8.58 (s, 1H), 8.47 (d,  $J = 3.8$  Hz, 1H), 8.36–8.40 (m, 2H), 7.73–7.83 (m, 6H), 7.62–7.66 (m, 2H), 7.42–7.45 (m, 2H), 7.35–7.40 (m, 4H), 7.30 (d,  $J = 8.2$  Hz, 2H), 5.10 (s, 1H), 4.91 (q,  $J = 7.1$  Hz, 1H), 4.79 (d,  $J = 5.5$  Hz, 2H), 4.50 (d,  $J = 9.3$  Hz, 1H), 4.42 (t,  $J = 8.4$  Hz, 1H), 4.27 (s, 1H), 3.56–3.64 (m, 2H), 3.50 (s, 2H), 3.20–3.24 (m, 2H), 2.79–2.94 (m, 4H), 2.45 (s, 3H), 2.40–2.44 (m, 4H), 2.24–2.30 (m, 1H), 2.11–2.17 (m, 1H), 1.94–2.03 (m, 2H), 1.76–1.82 (m, 1H), 1.47–1.50 (m, 2H), 1.37 (d,  $J = 7.0$  Hz, 3H), 0.93 (s, 9H);  $^{13}\text{C}$  NMR (150 MHz, DMSO- $d_6$ )  $\delta$ : 181.23, 172.42, 171.08, 170.07, 166.36, 151.93, 149.41, 148.68, 148.22, 145.12, 144.54, 141.37, 135.73, 134.63, 133.99, 131.57, 130.16, 129.28, 128.92, 127.58, 126.85, 124.23, 123.90, 121.85, 119.22, 110.59, 69.23, 61.40, 59.02, 56.85, 56.71, 55.37, 51.95, 48.15, 46.40, 39.38, 38.17, 35.65, 35.13, 23.33, 26.92, 23.53, 22.88, 16.44; HRMS (ESI, positive)  $m/z$  calcd for  $\text{C}_{53}\text{H}_{67}\text{N}_{10}\text{O}_7\text{S}_3$  (M+H) $^+$  1051.4351, found 1051.4346.

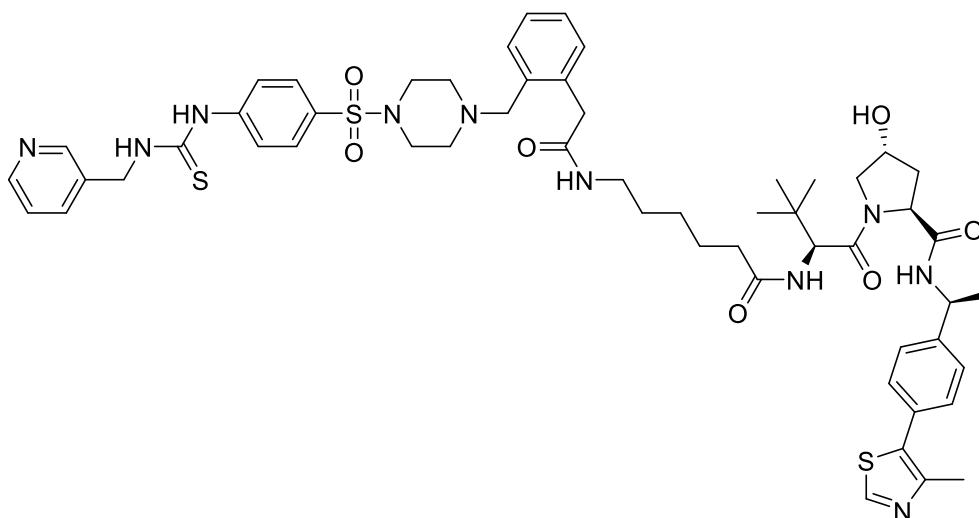

**(2*S*,4*R*)-1-((*S*)-3,3-Dimethyl-2-(6-(2-(2-((4-((3-(pyridin-3-ylmethyl)thioureido)phenyl)sulfo-nyl)piperazin-1-yl)methyl)phenyl)acetamido)hexanamido)butanoyl)-4-hydroxy-*N*-((*S*)-1-(4-(4-methylthiazol-5-yl)phenyl)ethyl)pyrrolidine-2-carboxamide (C3)** White solid, yield 23%, purity 97.9%. <sup>1</sup>H NMR (600 MHz, DMSO-*d*<sub>6</sub>)  $\delta$ : 10.71 (s, 1H), 8.99 (s, 1H), 8.97 (s, 1H), 8.52-8.61 (m, 2H), 8.47 (d, *J* = 4.7 Hz, 1H), 8.40 (d, *J* = 7.3 Hz, 1H), 7.93 (d, *J* = 8.0 Hz, 2H), 7.79 (d, *J* = 9.4 Hz, 1H), 7.77 (d, *J* = 7.3 Hz, 2H), 7.63 (d, *J* = 8.4 Hz, 2H), 7.42–7.44 (m, 2H), 7.36–7.39 (m, 2H), 7.26–7.33 (m, 5H), 5.14 (s, 1H), 4.88–4.96 (m, 1H), 4.80 (d, *J* = 4.9 Hz, 2H), 4.53 (d, *J* = 9.1 Hz, 1H), 4.44 (t, *J* = 8.0 Hz, 1H), 4.3 (s, 1H), 3.61 (s, 4H), 3.06 (s, 2H), 2.85 (s, 4H), 2.29–2.48 (m, 7H), 2.21–2.28 (m, 1H), 2.08–2.15 (m, 1H), 2.00–2.05 (m, 1H), 1.78–1.83 (m, 1H), 1.42–1.49 (m, 2H), 1.36 (d, *J* = 7.0 Hz, 3H), 1.17–1.26 (m, 3H), 0.94 (s, 9H), 0.80–0.87 (m, 1H); <sup>13</sup>C NMR (150 MHz, DMSO-*d*<sub>6</sub>)  $\delta$ : 181.24, 172.56, 171.07, 170.08, 168.71, 151.90, 149.29, 148.60, 148.20, 145.11, 144.84, 135.70, 134.64, 131.56, 130.13, 129.26, 128.77, 128.56, 126.83, 123.90, 121.35, 69.21, 59.01, 56.88, 56.70, 55.36, 51.51, 48.16, 44.87, 39.31, 38.17, 35.64, 35.36, 29.23, 26.90, 26.63, 25.55, 22.87, 16.43; HRMS (ESI, positive) *m/z* calcd for C<sub>54</sub>H<sub>69</sub>N<sub>10</sub>O<sub>7</sub>S<sub>3</sub> (M+H)<sup>+</sup> 1065.4507, found 1065.4508.

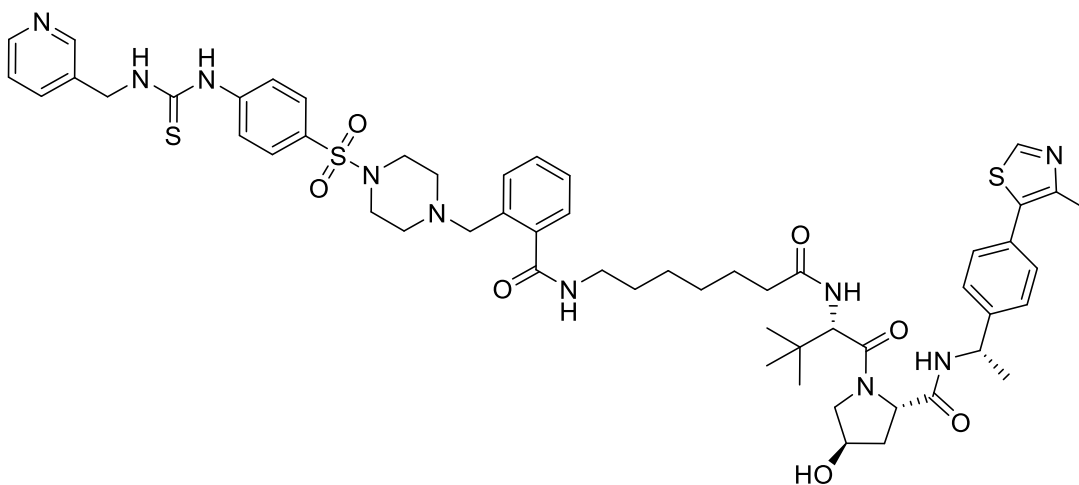

**(2*S*,4*R*)-1-((*S*)-3,3-Dimethyl-2-(7-(2-((4-((4-(3-(pyridin-3-ylmethyl)thioureido)phenyl)sulfonyl) piperazin-1-yl)methyl)benzamido)heptanamido)butanoyl)-4-hydroxy-*N*-((*S*)-1-(4-(4-methylthiazol-5-yl)phenyl)ethyl)pyrrolidine-2-carboxamide (C4)** White solid, yield 18%, purity 98.5%. <sup>1</sup>H NMR (600 MHz, DMSO-*d*<sub>6</sub>)  $\delta$ : 10.17 (s, 1H), 8.99 (s, 1H), 8.63 (s, 1H), 8.53-8.60 (m, 2H), 8.49 (d, *J* = 4.4 Hz, 1H), 8.40 (d, *J* = 7.7 Hz, 1H), 7.80-7.86 (m, 3H), 7.78 (d, *J* = 7.7 Hz, 1H), 7.64 (d, *J* = 8.6 Hz, 2H), 7.44 (d, *J* = 8.1 Hz, 2H), 7.29-7.40 (m, 7H), 5.14 (d, *J* = 3.5 Hz, 1H), 4.92 (q, *J* = 7.2 Hz, 1H), 4.80 (d, *J* = 5.3 Hz, 2H), 4.54 (d, *J* = 9.0 Hz, 1H), 4.44 (t, *J* = 8.1 Hz, 1H), 4.27-4.31 (m, 1H), 3.59-3.64 (m, 2H), 3.56 (s, 2H), 3.06 (q, *J* = 6.6 Hz, 2H), 2.85 (s, 4H), 2.46 (s, 3H), 2.43 (s, 4H), 2.22-2.30 (m, 1H), 2.10-2.15 (m, 1H), 1.98-2.05 (m, 2H), 1.76-1.83 (m, 1H), 1.41-1.52 (m, 2H), 1.38 (d, *J* = 7.0 Hz, 3H), 1.30-1.35 (m, 2H), 1.19-1.22 (m, 2H), 0.95 (s, 9H), 0.86 (t, *J* = 6.4 Hz, 1H); <sup>13</sup>C NMR (150 MHz, DMSO-*d*<sub>6</sub>)  $\delta$ : 181.15, 172.61, 171.07, 170.07, 168.74, 151.92, 149.37, 148.66, 148.20, 145.07, 144.54, 138.03, 135.73, 135.21, 134.60, 131.55, 130.67, 130.13, 129.21, 129.26, 128.81, 128.54, 127.63, 126.82, 123.89, 121.71, 69.20, 59.47, 59.00, 56.83, 56.69, 51.60, 48.14, 46.36, 45.12, 38.17, 35.64, 35.35, 29.32, 28.784, 26.89, 26.65, 25.83, 22.87, 16.42; HRMS (ESI, positive) *m/z* calcd for C<sub>55</sub>H<sub>71</sub>N<sub>10</sub>O<sub>7</sub>S<sub>3</sub> (M+H)<sup>+</sup> 1079.4664, found 1079.4657.

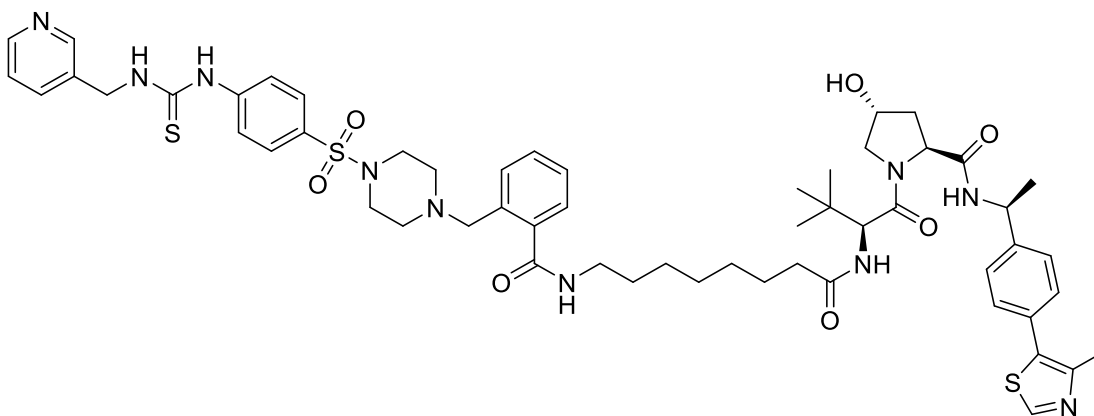

**(2*S*,4*R*)-1-((*S*)-3,3-Dimethyl-2-(8-(2-((4-((4-(3-(pyridin-3-ylmethyl)thioureido)phenyl)sulfonyl) piperazin-1-yl)methyl)benzamido)octanamido)butanoyl)-4-hydroxy-*N*-((*S*)-1-(4-(4-methylthiazol-5-yl)phenyl)ethyl)pyrrolidine-2-carboxamide (C5)** White solid, yield 22%, purity 95.7%. <sup>1</sup>H NMR (600 MHz, DMSO-*d*<sub>6</sub>)  $\delta$ : 10.15 (s, 1H), 8.97 (s, 1H), 8.53-8.64 (m, 3H), 8.48 (d, *J* = 4.5 Hz, 1H), 8.36 (d, *J* = 7.5 Hz, 1H), 7.83 (m, *J* = 8.3 Hz, 2H), 7.74-7.80 (m, 2H), 7.64 (d, *J* = 8.7 Hz, 2H), 7.43 (d, *J* = 8.3 Hz, 2H), 7.26-7.41 (m, 7H), 5.10 (s, 1H), 4.86-4.94 (m, 1H), 4.79 (d, *J* = 5.4 Hz, 2H), 4.52 (d, *J* = 9.3 Hz, 1H), 4.42 (t, *J* = 8.0 Hz, 1H), 4.28 (s, 1H), 3.53-3.63 (m, 3H), 3.07 (s, 2H), 2.72-2.95 (m, 4H), 2.36-2.48 (m, 7H), 2.22-2.28 (m, 1H), 2.08-2.13 (m, 1H), 1.99-2.03 (m, 1H), 1.77-1.81 (m, 1H), 1.44-1.52 (m, 2H), 1.37 (d, *J* = 7.0 Hz, 3H), 1.28-1.36 (m, 2H), 1.17-1.23 (m, 6H), 0.93 (s, 9H), 0.92 (s, 1H); <sup>13</sup>C NMR (150 MHz, DMSO-*d*<sub>6</sub>)  $\delta$ : 181.16, 172.57, 171.06, 170.08, 168.70, 151.92, 149.33, 148.62, 148.20, 134.62, 131.55, 130.14, 129.26, 128.82, 128.60, 126.83, 123.90, 121.71, 69.20, 59.44, 59.00, 56.81, 56.68, 51.59, 48.14, 45.11, 40.89, 38.17, 36.64, 35.38, 29.36, 29.08, 28.83, 26.89, 26.81, 25.82, 22.84, 16.42; HRMS (ESI, positive) *m/z* calcd for C<sub>56</sub>H<sub>73</sub>N<sub>10</sub>O<sub>7</sub>S<sub>3</sub> (M+H)<sup>+</sup> 1093.4820, found 1093.4809.

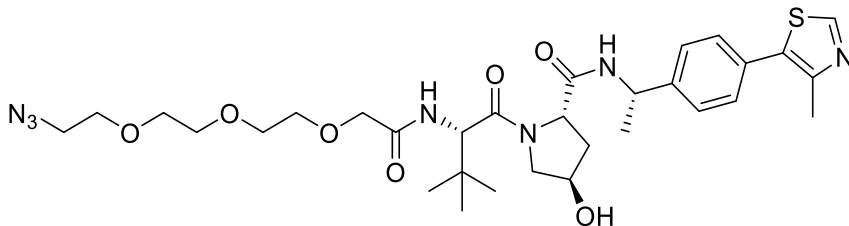

**(2S,4R)-1-((S)-14-Azido-2-(tert-butyl)-4-oxo-6,9,12-trioxa-3-azatetradecanoyl)-4-hydroxy-N-((S)-1-(4-(4-methylthiazol-5-yl)phenyl)ethyl)pyrrolidine-2-carboxamide (11a)** The compound **10a** (233 mg, 1 mmol), VHL ligand (444 mg, 1 mmol), HATU (570 mg, 1.5 mmol), DIPEA (194 mg, 1.5 mmol) were dissolved in dry DMF (15 mL) and then the mixture was stirred at room temperature for 5 h. The mixture was poured saturated NaCl solution (60 mL) and then extracted with ethyl acetate (20 mL × 3). The organic phases were combined and washed with of saturated NaCl solution (20 mL). After dried over sodium sulfate, it was concentrated and purified by silica gel column chromatography (dichloromethane/methanol=100/2) to obtain the intermediate **11a** as a colorless oil (138 mg, yield 21%). <sup>1</sup>H NMR (600 MHz, DMSO-*d*<sub>6</sub>) δ: 8.99 (s, 1H), 8.43 (d, *J* = 8.1 Hz, 1H), 8.23 (d, *J* = 9.4 Hz, 1H), 7.42 (dd, *J* = 34.0, 8.0 Hz, 4H), 5.14 (d, *J* = 3.4 Hz, 1H), 4.93 (t, *J* = 7.3 Hz, 1H), 4.53 (d, *J* = 9.0 Hz, 1H), 4.45 (t, *J* = 8.2 Hz, 1H), 4.30 (s, 1H), 4.10 (q, *J* = 5.1 Hz, 2H), 3.53–3.67 (m, 4H), 3.15–3.21 (m, 9H), 2.46 (s, 3H), 1.84–1.76 (m, 1H), 1.39 (d, *J* = 7.1 Hz, 3H), 1.23–1.29 (m, 2H), 0.96 (s, 9H).

The synthetic route of **11b** is similar to that of **11a**.

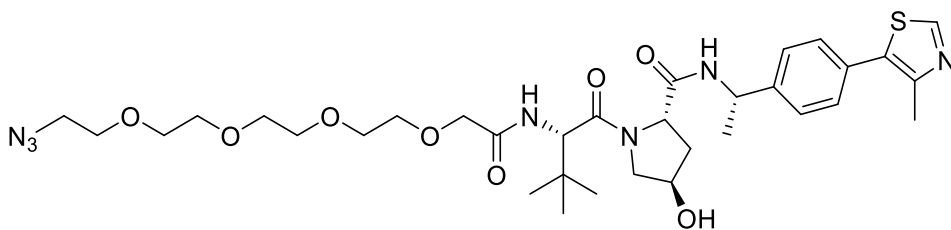

**(2S,4R)-1-((S)-17-Azido-2-(tert-butyl)-4-oxo-6,9,12,15-tetraoxa-3-azahepta-0dec-oyl)-4-hydroxy-N-((S)-1-(4-(4-methylthiazol-5-yl)phenyl)ethyl)pyrrolidine-2-carboxamide (11b)** Colorless oil, yield 28%. <sup>1</sup>H NMR (600 MHz, CDCl<sub>3</sub>) δ: 7.59 (s, 1H), 7.38–7.48 (m, 4H), 7.31 (d, *J* = 7.9 Hz, 1H), 5.07 (t, *J* = 7.0 Hz, 1H), 4.77 (t, *J* = 7.9 Hz, 1H), 4.46–4.52 (m, 2H), 4.17 (d, *J* = 10.6 Hz, 1H), 3.99–4.07 (m, 2H), 3.64–3.71 (m, 16H), 3.38 (t, *J* = 4.8 Hz, 2H), 2.67–2.74 (m, 3H), 1.99–2.11 (m, 2H), 1.47 (d, *J* = 7.1 Hz, 3H), 1.07 (s, 9H).

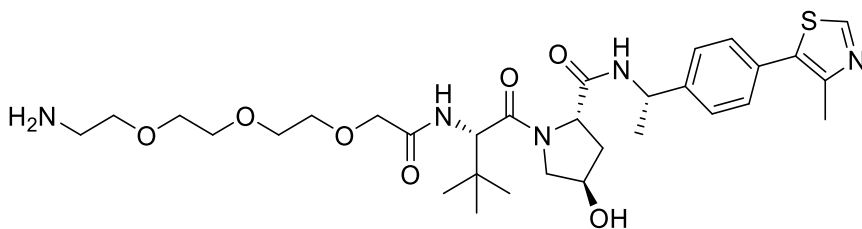

**(2S,4R)-1-((S)-14-amino-2-(tert-butyl)-4-oxo-6,9,12-trioxa-3-azatetradecanoyl)-4-hydroxy-N-((S)-1-(4-(4-methylthiazol-5-yl)phenyl)ethyl)pyrrolidine-2-carboxamide (12a)** The intermediate **11a** (100 mg, 0.15

mmol) was dissolved in CH<sub>2</sub>Cl<sub>2</sub> (15 mL) and Pd/C (100 mg, 0.6 mmol, 45% purity) was added. The mixture was stirred at room temperature and maintained overnight under the atmosphere of hydrogen. Then the resulting mixture was filtrated through diatomite and the filtrate was concentrated under reduced pressure to afford the intermediate **12a** (96 mg, yield 96%) as a colorless oil. <sup>1</sup>H NMR (600 MHz, CDCl<sub>3</sub>) δ: 8.67 (s, 1H), 8.17 (s, 1H), 7.36–7.43 (m, 5H), 5.12 (t, *J* = 7.5 Hz, 1H), 4.82 (t, *J* = 8.3 Hz, 1H), 4.66 (d, *J* = 10.0 Hz, 1H), 4.43 (s, 1H), 4.18 (d, *J* = 15.2 Hz, 1H), 3.99–4.06 (m, 2H), 3.58–3.81 (m, 14H), 3.08–3.20 (m, 2H), 2.53 (s, 3H), 2.14–2.22 (m, 2H), 1.51 (d, *J* = 6.7 Hz, 3H), 1.44–1.49 (m, 1H), 0.95 (s, 9H).

The synthetic route of **12b** is similar to that of **12a**.

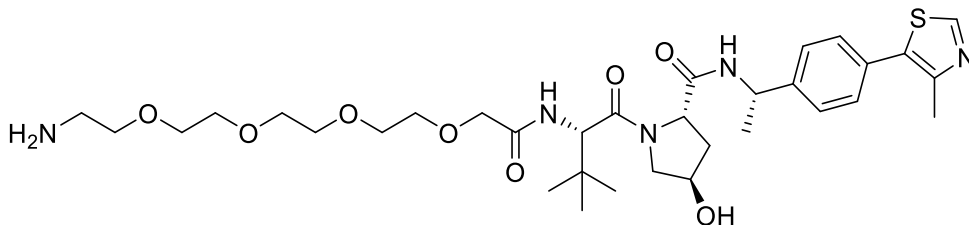

**(2S,4R)-1-((S)-17-amino-2-(tert-butyl)-4-oxo-6,9,12,15-tetraoxa-3-azaheptadecan-oyl)-4-hydroxy-N-((S)-1-(4-(4-methylthiazol-5-yl)phenyl)ethyl)pyrrolidine-2-carboxamide (12b)** Colorless oil, yield 96%. <sup>1</sup>H NMR (600 MHz, CDCl<sub>3</sub>) δ: 8.75 (s, 1H), 7.48 (d, *J* = 7.8 Hz, 1H), 7.36–7.44 (m, 6H), 5.08 (t, *J* = 7.3 Hz, 1H), 4.76 (t, *J* = 8.3 Hz, 1H), 4.50–4.54 (m, 2H), 4.17 (s, 1H), 4.13–4.17 (m, 1H), 3.75 (s, 1H), 3.66–3.72 (m, 16H), 3.59 (dd, *J* = 11.5, 3.5 Hz, 1H), 3.39 (q, *J* = 6.3 Hz, 2H), 2.57–2.63 (m, 1H), 2.56 (s, 3H), 2.05–2.09 (m, 1H), 1.47 (d, *J* = 7.0 Hz, 3H), 1.07 (s, 9H).

The synthetic routes of **A6** and **A7** is similar to that of **A1**.

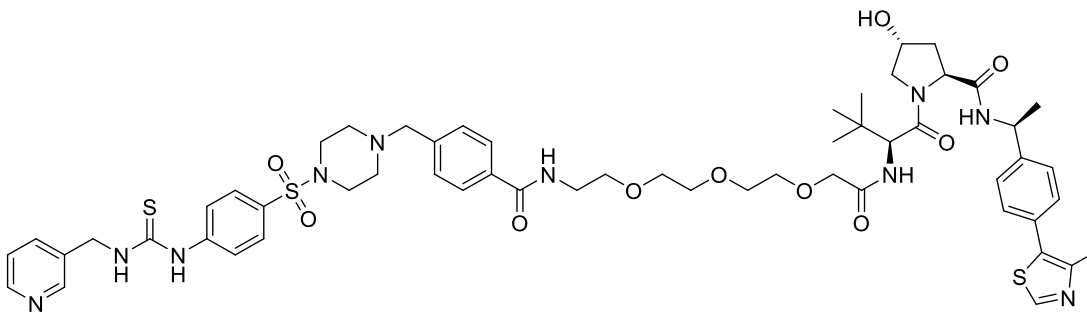

**(2S,4R)-1-((S)-15-(tert-butyl)-1,13-dioxo-1-(4-((4-(3-(pyridin-3-ylmethyl)thioureido)phen-yl)sulfonyl)piperazin-1-yl)methyl)phenyl)-5, 8, 11-trioxo-2, 14-diazahexadecan-16-oyl)-4-hydroxy-N-((S)-1-(4-(4-methylthiazol-5-yl)phenyl)ethyl)pyrrolidine-2-carboxamide (A6)** White solid, yield 29%, purity 99.8%. <sup>1</sup>H NMR (600 MHz, DMSO-*d*<sub>6</sub>) δ: 10.14 (s, 1H), 8.98 (s, 1H), 8.63 (s, 1H), 8.58 (s, 1H), 8.48 (d, *J* = 7.1 Hz, 1H), 8.41 (d, *J* = 8.9 Hz, 1H), 8.12 (d, *J* = 9.0 Hz, 1H), 7.91 (d, *J* = 7.6 Hz, 2H), 7.74–7.84 (m, 4H), 7.65 (d, *J* = 8.1 Hz, 2H), 7.37–7.44 (m, 7H), 5.12 (s, 1H), 4.67–5.00 (m, 7H), 4.53 (d, *J* = 9.0 Hz, 1H), 4.44 (t, *J* = 7.7 Hz, 1H), 4.28 (s, 1H), 3.48–3.65 (m, 6H), 2.89 (m, 4H), 2.33–2.48 (m, 10H), 2.00–2.08 (m, 1H), 1.74–1.83 (m, 1H), 1.38 (d, *J* = 6.4 Hz, 3H), 1.15–1.35 (m, 3H), 0.95 (s, 9H), 0.79–0.93 (m, 2H); <sup>13</sup>C NMR (150 MHz, DMSO-*d*<sub>6</sub>) δ: 181.17, 170.96, 169.48, 166.66, 166.53, 151.86, 149.38, 148.64, 148.17, 145.07, 144.44, 144.34, 135.70, 134.58, 131.53, 130.35, 129.78, 129.29, 128.86, 128.52, 126.79, 123.85,

121.95, 69.19, 62.97, 61.30, 59.03, 56.84, 51.98, 48.15, 46.37, 45.17, 38.14, 36.02, 26.77, 22.83, 16.40;  
 HRMS (ESI, positive)  $m/z$  calcd for  $C_{56}H_{73}N_{10}O_{10}S_3$  (M+H)<sup>+</sup> 1141.4668, found 1141.4675.

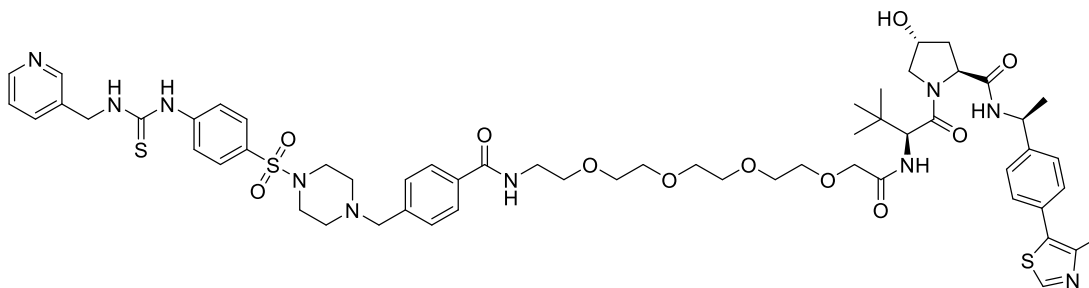

**(2*S*,4*R*)-1-((*S*)-18-(*tert*-Butyl)-1,16-dioxo-1-(4-(((4-((3-(pyridin-3-ylmethyl)thioureido)phenyl)sulfonyl)piperazin-1-yl)methyl)phenyl)-5, 8, 11, 14-tetraoxa-2, 17-diazanonadecan-19-oyl)-4-hydroxy-*N*-((*S*)-1-(4-(4-methylthiazol-5-yl)phenyl)ethyl)-pyrrolidine-2-carboxamide (A7)** White solid, yield 23%, purity 99.7%. <sup>1</sup>H NMR (600 MHz, DMSO-*d*<sub>6</sub>)  $\delta$ : 10.15 (s, 1H), 8.99 (s, 1H), 8.64 (s, 1H), 8.58 (d,  $J$  = 1.7 Hz, 1H), 8.49 (dd,  $J$  = 5.0, 1.4 Hz, 1H), 8.41–8.46 (m, 2H), 7.79 (dd,  $J$  = 24.7, 8.7 Hz, 4H), 7.78–7.79 (m, 1H), 7.65 (d,  $J$  = 8.8 Hz, 2H), 7.43 (d,  $J$  = 8.2 Hz, 2H), 7.34–7.40 (m, 4H), 7.31 (d,  $J$  = 8.2 Hz, 2H), 5.13 (d,  $J$  = 3.5 Hz, 1H), 4.88–4.93 (m, 1H), 4.80 (d,  $J$  = 5.4 Hz, 2H), 4.55 (d,  $J$  = 9.6 Hz, 1H), 4.45 (t,  $J$  = 8.3 Hz, 1H), 4.27–4.31 (m, 1H), 3.96 (s, 2H), 3.51–3.61 (m, 18H), 3.39–3.42 (m, 2H), 2.89 (s, 4H), 2.46 (s, 3H), 2.43 (s, 4H), 2.03–2.08 (m, 1H), 1.75–1.82 (m, 1H), 1.38 (d,  $J$  = 6.9 Hz, 3H), 0.94 (s, 9H); <sup>13</sup>C NMR (150 MHz, DMSO-*d*<sub>6</sub>)  $\delta$ : 181.20, 170.90, 169.47, 168.95, 166.51, 151.89, 149.41, 148.67, 148.20, 145.14, 144.45, 141.49, 135.72, 134.60, 133.69, 131.55, 130.14, 129.27, 129.07, 128.91, 127.60, 126.77, 123.87, 70.88, 70.29, 70.21, 70.19, 70.05, 69.35, 69.22, 61.37, 59.01, 56.96, 56.15, 51.94, 48.19, 46.38, 45.19, 38.17, 36.17, 26.67, 22.88, 16.43; HRMS (ESI, positive)  $m/z$  calcd for  $C_{58}H_{76}N_{10}O_{11}S_3Na$  (M+Na)<sup>+</sup> 1207.4749, found 1207.4753.

The synthetic route of the intermediate **13** is similar to that of **11a**.

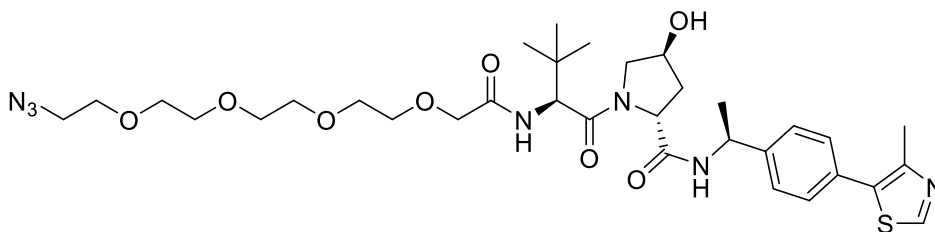

**(2*R*,4*S*)-1-((*S*)-17-Azido-2-(*tert*-butyl)-4-oxo-6,9,12,15-tetraoxa-3-azahepta-decanoyl)-4-hydroxy-*N*-((*S*)-1-(4-(4-methylthiazol-5-yl)phenyl)ethyl)pyrrolidine-2-carboxamide (13)** Colorless oil, yield 18%. <sup>1</sup>H NMR (600 MHz, DMSO-*d*<sub>6</sub>)  $\delta$ : 8.98 (s, 1H), 8.14 (d,  $J$  = 8.1 Hz, 1H), 7.38–7.50 (m, 6H), 4.86–4.94 (m, 1H), 4.49 (d,  $J$  = 8.7 Hz, 1H), 4.37–4.43 (m, 1H), 4.30–4.36 (m, 1H), 3.44–3.64 (m, 18H), 3.36 (t,  $J$  = 5.2 Hz, 2H), 2.46 (s, 3H), 2.00–2.06 (m, 1H), 1.90–1.96 (m, 1H), 1.32 (d,  $J$  = 7.0 Hz, 3H), 0.99 (s, 9H).

The synthetic route of the intermediate **14** is similar to that of **12a**.



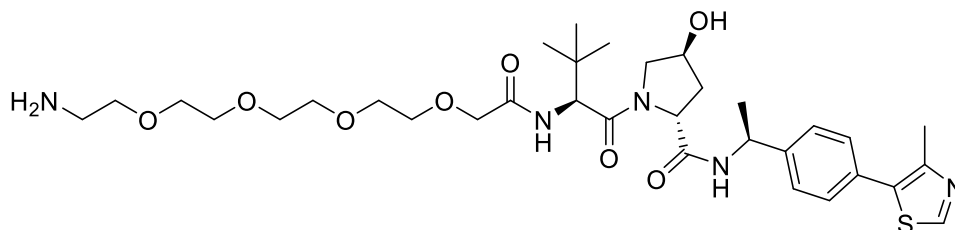

**(2R,4S)-1-((S)-17-amino-2-(tert-butyl)-4-oxo-6,9,12,15-tetraoxa-3-azahepta-decanoyl)-4-hydroxy-N-((S)-1-(4-(4-methylthiazol-5-yl)phenyl)ethyl)pyrrolidine-2-carboxamide (14)** Colorless oil, yield 95%. <sup>1</sup>H NMR (600 MHz, DMSO-*d*<sub>6</sub>)  $\delta$ : 8.83–9.01 (m, 1H), 8.12–8.24 (m, 1H), 7.26–7.52 (m, 7H), 5.21 (s, 1H), 4.83 (t, *J* = 6.7 Hz, 1H), 4.20–4.49 (m, 4H), 3.61–3.77 (m, 1H), 3.42–3.57 (m, 18H), 2.36 (s, 3H), 1.82–2.02 (m, 2H), 1.27 (d, *J* = 6.8 Hz, 3H), 0.90 (s, 9H).

The synthetic route of the intermediate **D1** is similar to that of **A1**.

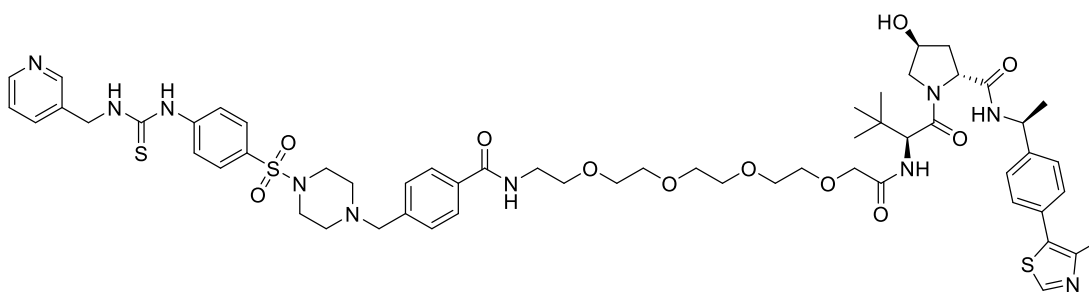

**(2R,4S)-1-((S)-18-(tert-Butyl)-1,16-dioxo-1-((4-((3-(pyridin-3-ylmethyl)thioureido)phenyl)sulfonyl)piperazin-1-yl)methyl)phenyl)-5, 8, 11, 14-tetraoxa-2, 17-diazanonadecan-19-oyl)-4-hydroxy-N-((S)-1-(4-(4-methylthiazol-5-yl)phenyl)ethyl)-pyrrolidine-2-carboxamide (D1)** White solid, yield 31%, purity 99.3%. <sup>1</sup>H NMR (600 MHz, DMSO-*d*<sub>6</sub>)  $\delta$ : 10.12 (s, 1H), 8.95 (s, 1H), 8.61 (s, 1H), 8.56 (s, 1H), 8.46 (d, *J* = 4.2 Hz, 1H), 8.40 (t, *J* = 5.4 Hz, 1H), 8.11 (d, *J* = 8.0 Hz, 1H), 7.72–7.80 (m, 5H), 7.63 (d, *J* = 8.6 Hz, 2H), 7.35–7.44 (m, 6H), 7.28 (d, 2H), 5.11 (d, *J* = 3.7 Hz, 1H), 4.85–4.91 (m, 1H), 4.78 (d, *J* = 5.1 Hz, 2H), 4.47 (d, *J* = 8.7 Hz, 1H), 4.38 (t, *J* = 6.5 Hz, 1H), 4.28–4.35 (m, 1H), 3.91 (q, *J* = 15.4 Hz, 2H), 3.70–3.76 (m, 1H), 3.43–3.54 (m, 16H), 3.34–3.37 (m, 2H), 2.86 (s, 4H), 2.43 (s, 3H), 2.38–2.42 (m, 4H), 1.97–2.04 (m, 1H), 1.88–1.95 (m, 1H), 1.37 (s, 1H), 1.30 (d, *J* = 7.0 Hz, 3H), 0.94 (s, 9H); <sup>13</sup>C NMR (150 MHz, DMSO-*d*<sub>6</sub>)  $\delta$ : 181.20, 170.99, 169.61, 169.48, 166.51, 151.86, 149.41, 148.67, 148.20, 144.77, 144.46, 141.49, 135.73, 134.60, 133.69, 131.57, 130.10, 129.18, 128.90, 127.59, 127.24, 127.03, 123.87, 121.94, 70.80, 70.22, 70.17, 69.93, 69.34, 68.91, 61.38, 59.17, 56.54, 55.81, 51.94, 47.90, 46.38, 45.19, 38.27, 35.27, 26.77, 22.81, 16.40; HRMS (ESI, positive) *m/z* calcd for C<sub>58</sub>H<sub>77</sub>N<sub>10</sub>O<sub>11</sub>S<sub>3</sub> (M+H)<sup>+</sup> 1185.4930, found 1185.4927.

The synthetic route of the intermediate **15** is similar to that of **6**.

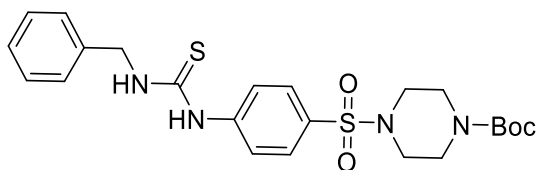

**tert-Butyl 4-((4-(3-benzylthioureido)phenyl)sulfonyl)piperazine-1-carboxylate (15)** White solid, yield 90%. <sup>1</sup>H NMR (600 MHz, DMSO-*d*<sub>6</sub>) δ: 10.06 (s, 1H), 8.54 (s, 1H), 7.83 (d, *J* = 8.7 Hz, 2H), 7.65 (d, *J* = 8.7 Hz, 2H), 7.35 (d, *J* = 4.4 Hz, 4H), 7.26–7.30 (m, 1H), 4.76 (s, 2H), 3.36–3.41 (m, 4H), 2.83 (t, *J* = 4.8 Hz, 4H), 1.34 (s, 9H).

The synthetic route of the intermediate **17** is similar to that of **8**.

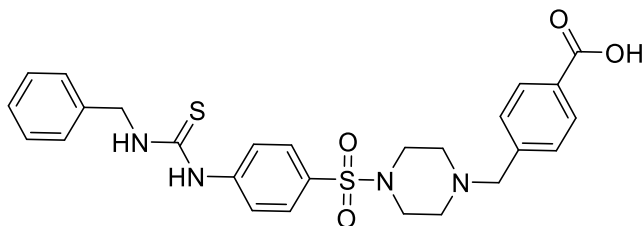

**4-((4-((4-(3-Benzylthioureido)phenyl)sulfonyl)piperazin-1-yl)methyl)benzoic acid (17)** White solid, yield 46%. <sup>1</sup>H NMR (600 MHz, DMSO-*d*<sub>6</sub>) δ: 12.81 (s, 1H), 10.07 (s, 1H), 8.57 (s, 1H), 7.83–7.86 (m, 4H), 7.64–7.65 (m, 2H), 7.34–7.36 (m, 6H), 7.26–7.29 (m, 1H), 4.76 (d, *J* = 4.7 Hz, 2H), 3.53 (s, 2H), 2.89 (s, 4H), 2.44 (s, 4H).

The synthetic route of compound **E1** is similar to that of **A1**.

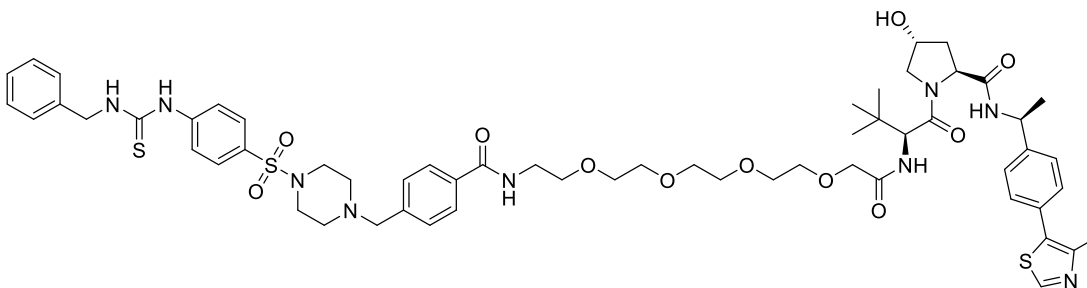

**(2S,4R)-1-((S)-1-(4-((4-(3-benzylthioureido)phenyl)sulfonyl)piperazin-1-yl)-methyl)phen-yl)-18-(tert-butyl)-1,16-dioxo-5, 8, 11, 14-tetraoxa-2,17-diazanonane-19-yl)-4-hydroxy-N-((S)-1-(4-(4-methylthiazol-5-yl)phenyl)ethyl)pyrrole-dine-2-carboxamide (E1)** White solid, yield 14%, purity 95.8%. <sup>1</sup>H NMR (600 MHz, DMSO-*d*<sub>6</sub>) δ: 10.04 (s, 1H), 8.53 (s, 1H), 8.37–8.45 (m, 2H), 7.81 (d, *J* = 8.1 Hz, 2H), 7.74 (d, *J* = 7.8 Hz, 2H), 7.62 (d, *J* = 8.5 Hz, 2H), 7.40–7.43 (m, 1H), 7.23–7.38 (m, 10H), 7.06–7.21 (m, 2H), 5.07–5.14 (m, 1H), 4.80–4.93 (m, 1H), 4.75 (d, *J* = 4.4 Hz, 2H), 4.53 (d, *J* = 9.4 Hz, 1H), 4.38–4.45 (m, 1H), 4.26 (s, 1H), 3.86–3.97 (m, 2H), 3.47–3.60 (m, 18H), 3.35–3.41 (m, 2H), 2.86 (s, 4H), 2.43 (s, 1H), 2.41 (s, 4H), 1.98–2.07 (m, 1H), 1.68–1.80 (m, 1H), 1.35 (d, *J* = 6.6 Hz, 3H), 1.18–1.24 (m, 2H), 0.92 (s, 9H); <sup>13</sup>C NMR (150 MHz, DMSO-*d*<sub>6</sub>) δ: 206.47, 180.98, 170.90, 169.47, 168.96, 166.53, 151.89, 148.20, 145.13, 144.61, 143.62, 141.50, 138.88, 133.69, 133.49, 131.56, 130.15, 129.87, 129.27, 128.80, 127.99, 127.60, 127.50, 126.78, 126.17, 121.70, 70.89, 70.30, 70.22, 70.19, 70.06, 69.35, 69.22, 61.38, 60.19, 59.01, 56.96, 56.15, 51.94, 49.66, 48.20, 48.10, 47.61, 46.39, 38.17, 36.17, 29.91, 29.46, 26.76, 26.68, 23.01, 22.88, 21.20, 16.43, 14.53; HRMS (ESI, positive) *m/z* calcd for C<sub>59</sub>H<sub>78</sub>N<sub>9</sub>O<sub>11</sub>S<sub>3</sub> (M+H)<sup>+</sup> 1184.4977, found 1184.5001.

# NMR spectra and HRMS reports

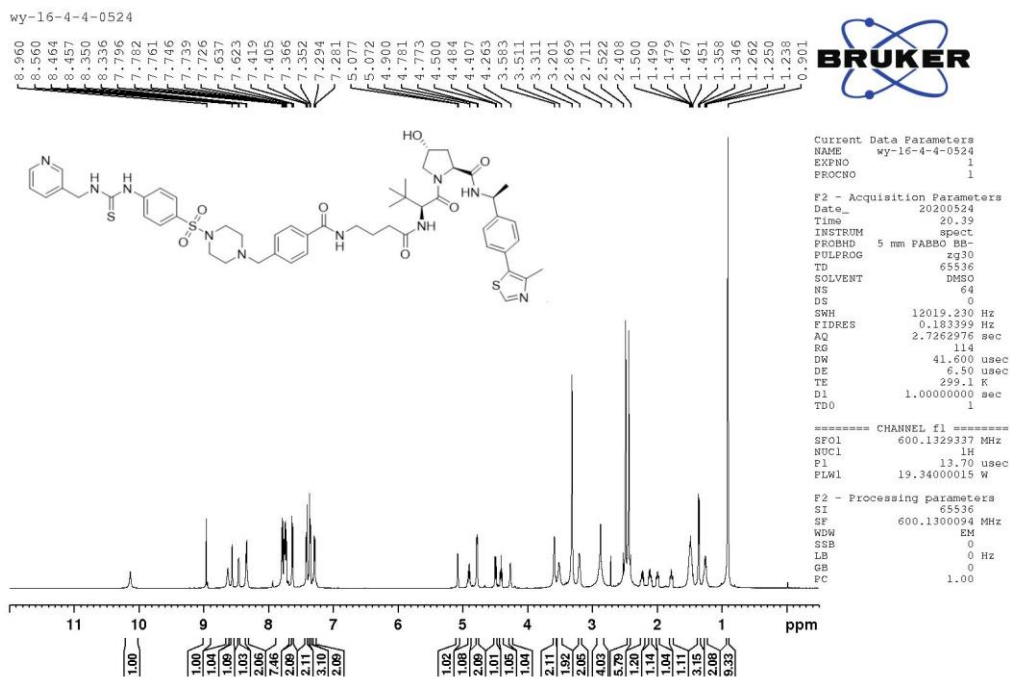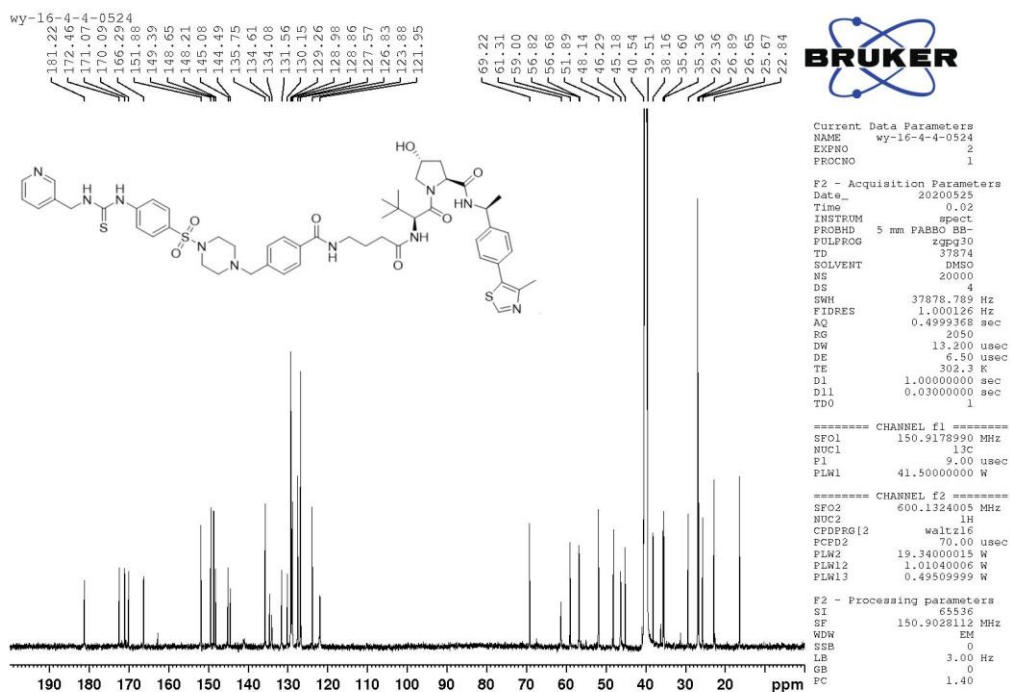

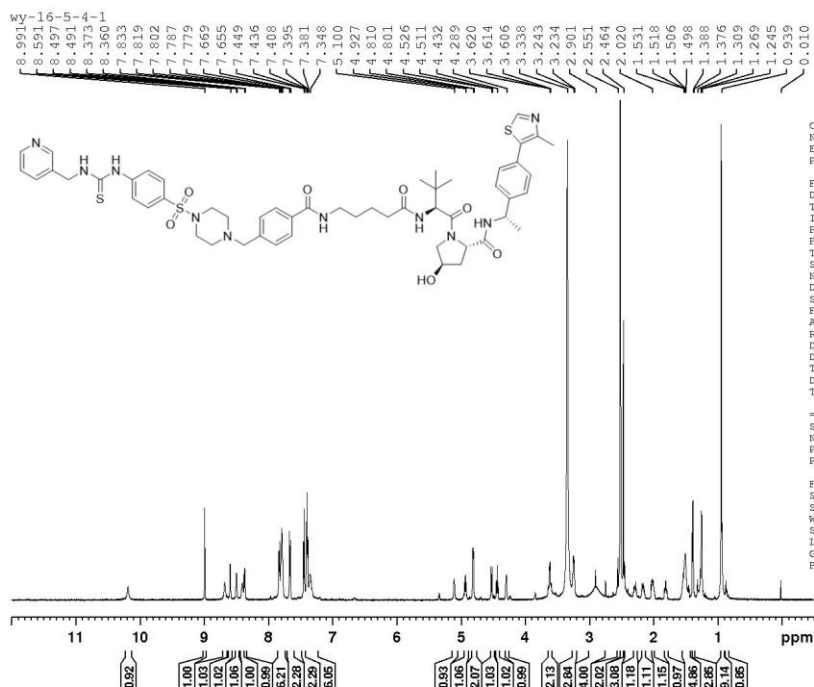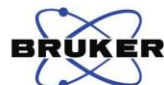

Current Data Parameters  
 NAME wy-16-5-4-1  
 EXPNO 1  
 PROCNO 1

F2 - Acquisition Parameters  
 Date\_ 20200526  
 Time 3.36  
 INSTRUM spect  
 PROBHD 5 mm PABBO BB-  
 PULPROG zgpg30  
 TD 65536  
 SOLVENT DMSO  
 NS 16  
 DS 0  
 SWH 12019.230 Hz  
 FIDRES 0.183399 Hz  
 AQ 2.7262976 sec  
 RG 203  
 DW 41.600 usec  
 DE 6.50 usec  
 TE 299.3 K  
 D1 1.00000000 sec  
 TDO 1

===== CHANNEL f1 =====  
 SF01 600.1329337 MHz  
 NUC1 1H  
 P1 13.70 usec  
 PLW1 19.34000015 W

F2 - Processing parameters  
 SI 65536  
 SF 600.1299919 MHz  
 WDW EM  
 SSB 0  
 LB 0 Hz  
 GB 0  
 FC 1.00

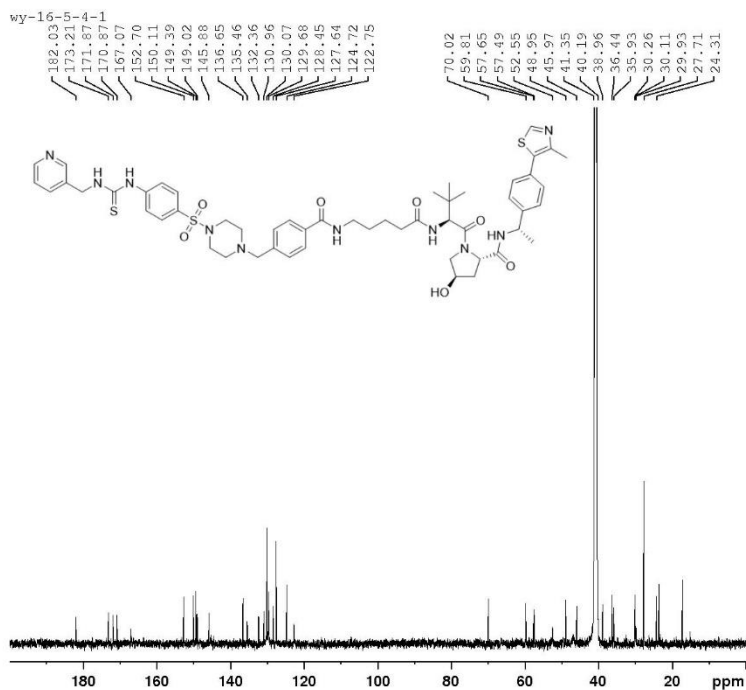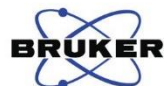

Current Data Parameters  
 NAME wy-16-5-4-1  
 EXPNO 2  
 PROCNO 1

F2 - Acquisition Parameters  
 Date\_ 20200528  
 Time 23.23  
 INSTRUM spect  
 PROBHD 5 mm PABBO BB-  
 PULPROG zgpg30  
 TD 37874  
 SOLVENT MeOD  
 NS 4  
 DS 4  
 SWH 37878.789 Hz  
 FIDRES 1.000126 Hz  
 AQ 0.4999368 sec  
 RG 2050  
 DW 13.200 usec  
 DE 6.50 usec  
 TE 302.2 K  
 D1 1.00000000 sec  
 D11 0.03000000 sec  
 TDO 1

===== CHANNEL f1 =====  
 SF01 150.9178990 MHz  
 NUC1 13C  
 P1 9.00 usec  
 PLW1 41.50000000 W

===== CHANNEL f2 =====  
 SF02 600.1324005 MHz  
 NUC2 1H  
 CPDPRG[2] waltz16  
 FCE[2] 70.00 usec  
 PLW2 19.34000015 W  
 PLW12 1.01040006 W  
 PLW13 0.49509999 W

F2 - Processing parameters  
 SI 65536  
 SF 150.9028112 MHz  
 WDW EM  
 SSB 0  
 LB 3.00 Hz  
 GB 0  
 FC 1.40



wy-16-7-4-520

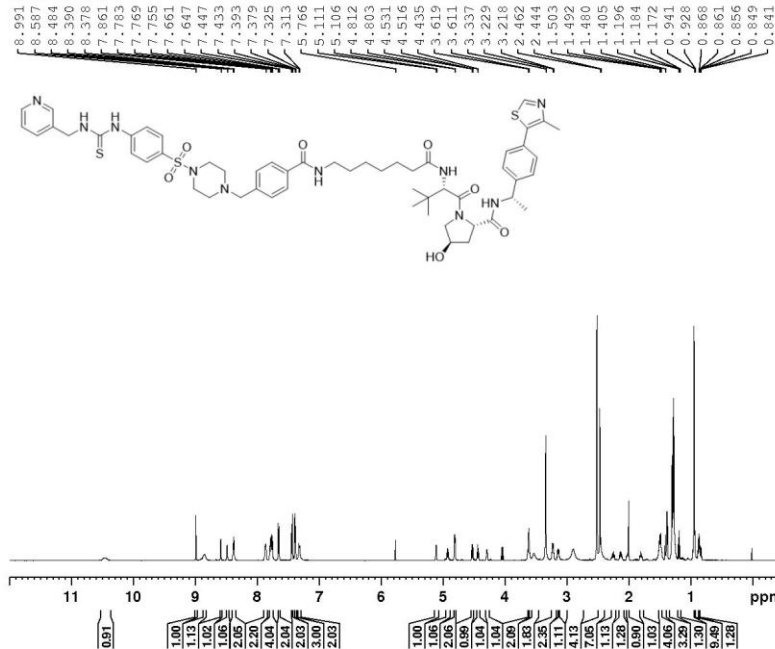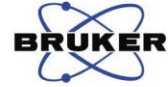

Current Data Parameters  
 NAME wy-16-7-4-520  
 EXPNO 1  
 PROCNO 1

F2 - Acquisition Parameters  
 Date\_ 20200521  
 Time 9.14  
 INSTRUM spect  
 PROBHD 5 mm PABBO BB-  
 PULPROG zg30  
 TD 65536  
 SOLVENT DMSO  
 NS 16  
 DS 0  
 SWH 12019.230 Hz  
 FIDRES 0.183399 Hz  
 AQ 2.7262976 sec  
 RG 1281  
 DW 41.600 usec  
 DE 6.50 usec  
 TE 298.1 K  
 D1 1.00000000 sec  
 TDO 1

===== CHANNEL f1 =====  
 SF01 600.1329337 MHz  
 NUC1 1H  
 P1 13.70 usec  
 PLW1 19.34000015 W

F2 - Processing parameters  
 SI 65536  
 SF 600.1299921 MHz  
 WDW EM  
 SSB 0 Hz  
 LB 0 Hz  
 GB 0  
 PC 1.00

wy-16-6-4

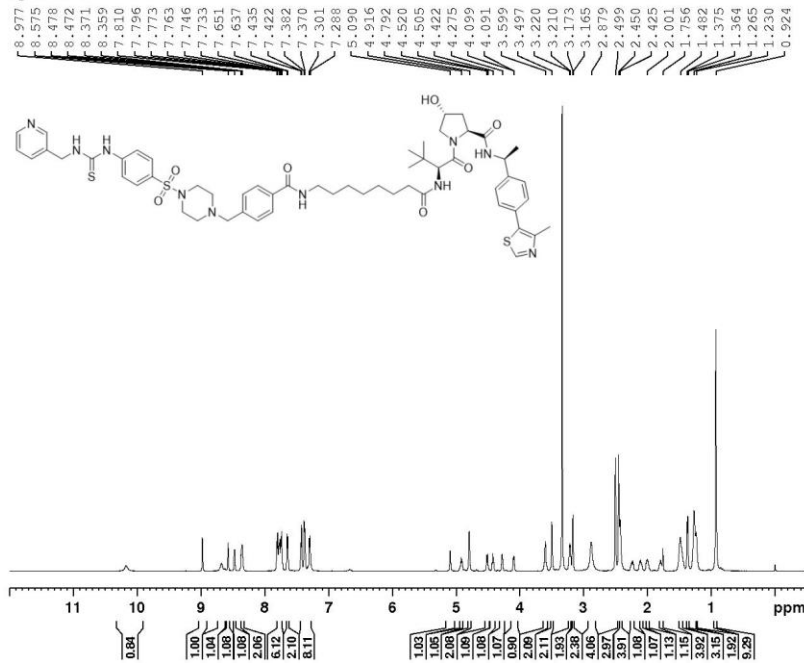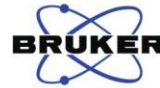

Current Data Parameters  
 NAME wy-16-6-4  
 EXPNO 1  
 PROCNO 1

F2 - Acquisition Parameters  
 Date\_ 20200612  
 Time 20.45  
 INSTRUM spect  
 PROBHD 5 mm PABBO BB-  
 PULPROG zg30  
 TD 65536  
 SOLVENT DMSO  
 NS 64  
 DS 0  
 SWH 12019.230 Hz  
 FIDRES 0.183399 Hz  
 AQ 2.7262976 sec  
 RG 128  
 DW 41.600 usec  
 DE 6.50 usec  
 TE 298.1 K  
 D1 1.00000000 sec  
 TDO 1

===== CHANNEL f1 =====  
 SF01 600.1329337 MHz  
 NUC1 1H  
 P1 13.70 usec  
 PLW1 19.34000015 W

F2 - Processing parameters  
 SI 65536  
 SF 600.1299995 MHz  
 WDW EM  
 SSB 0 Hz  
 LB 0 Hz  
 GB 0  
 PC 1.00

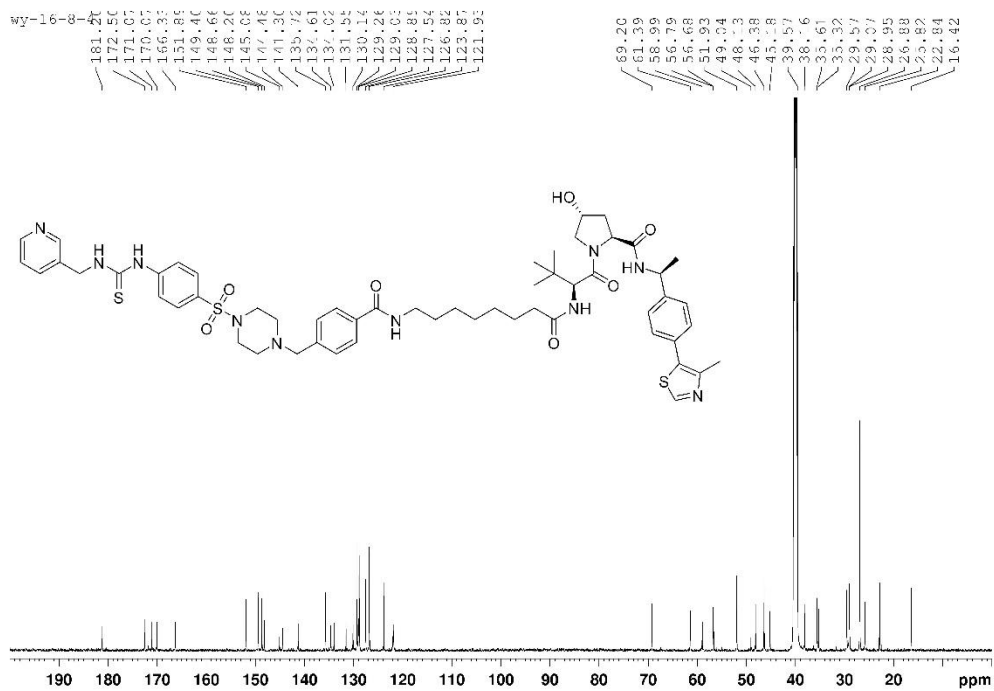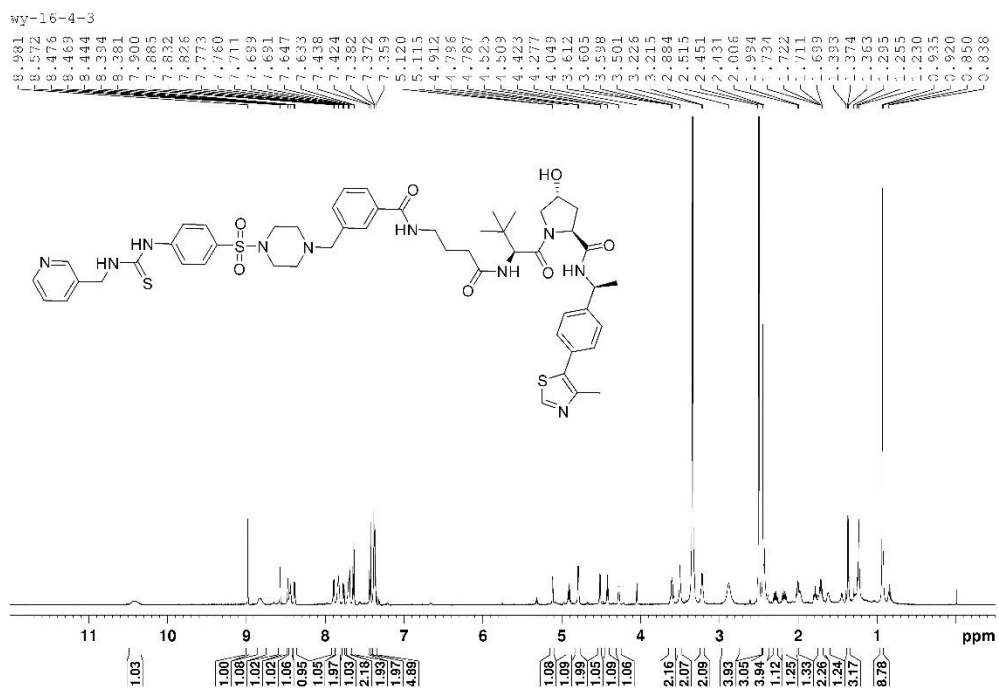





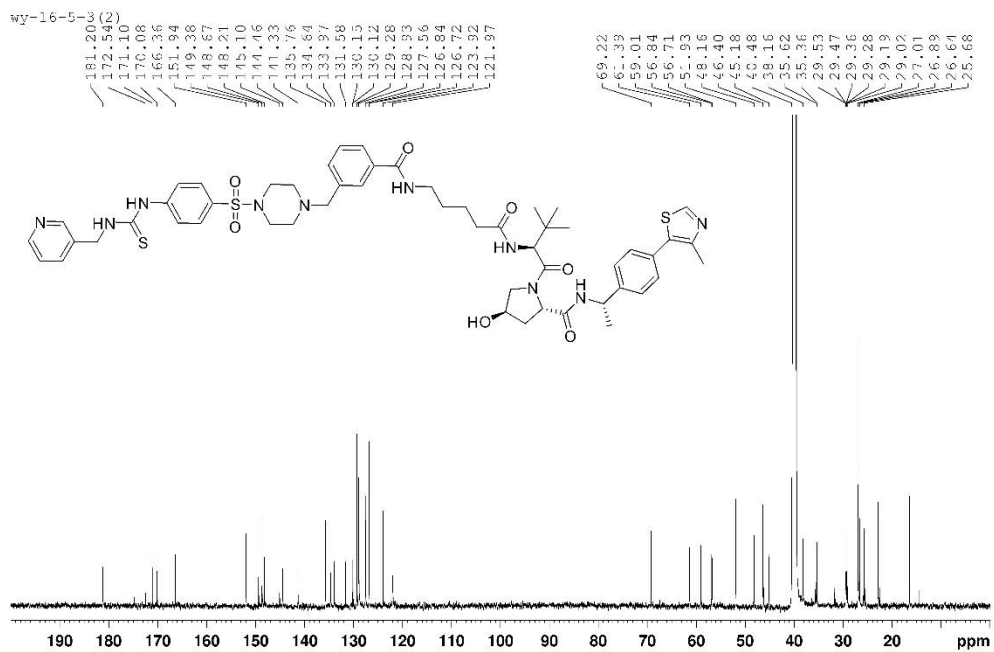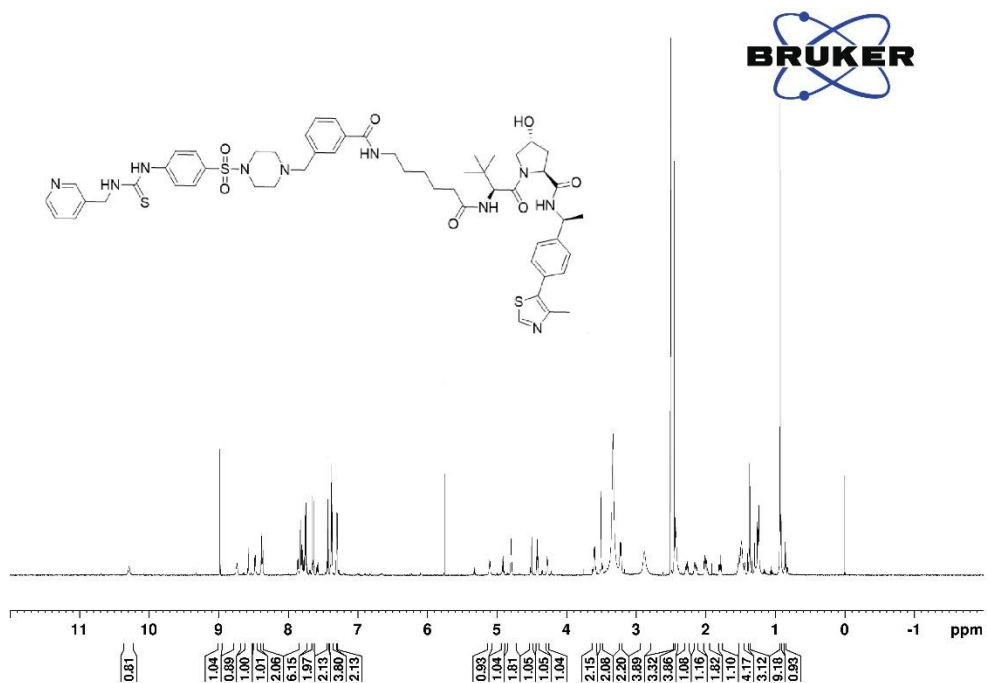

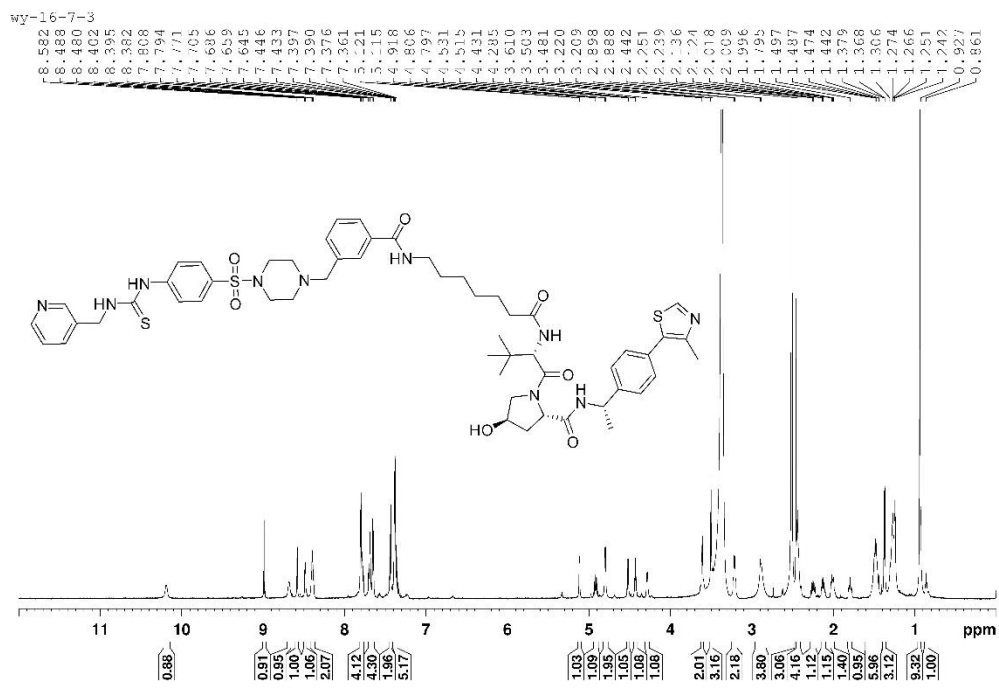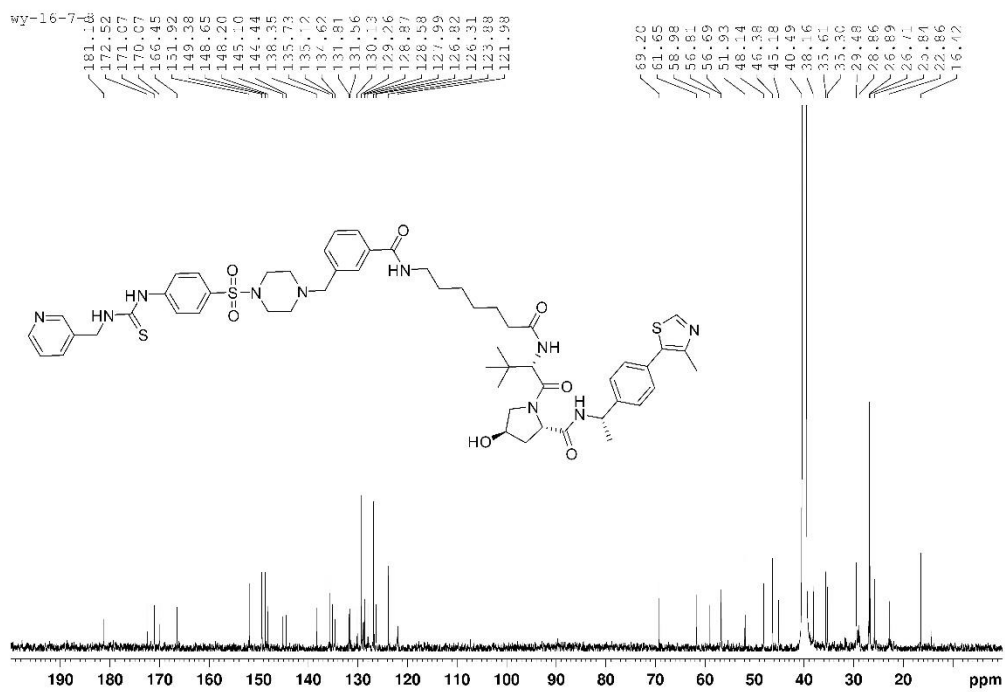

wy-16-4-2

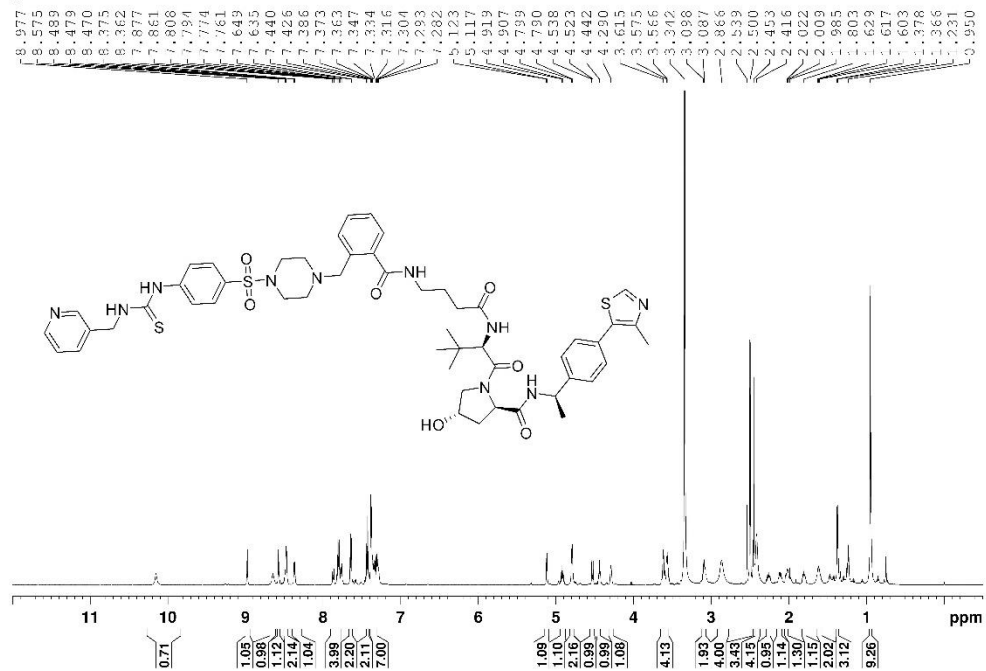

wy-16-4-2

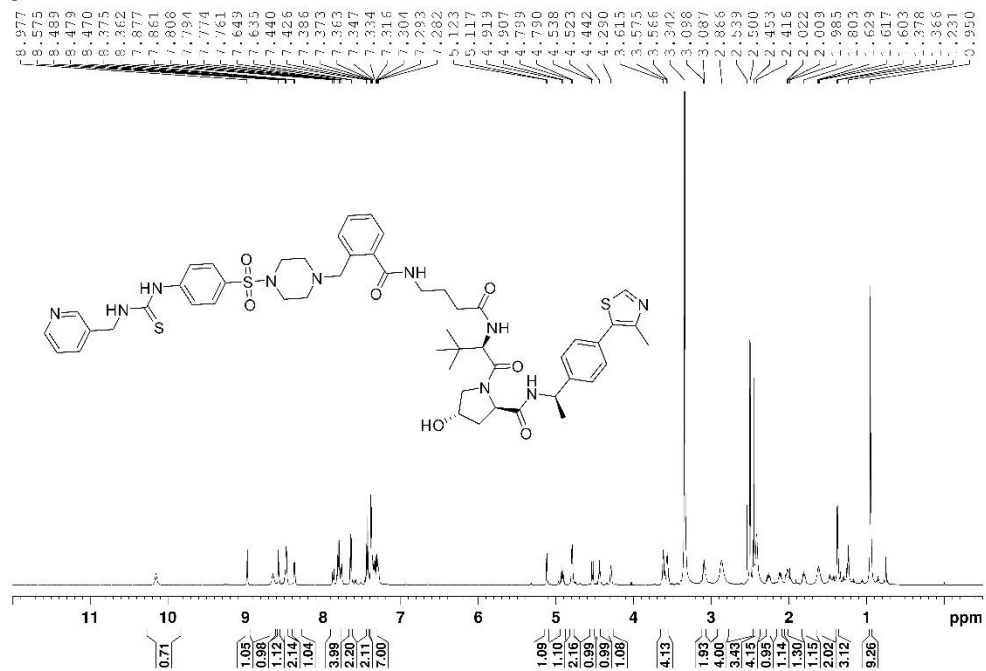

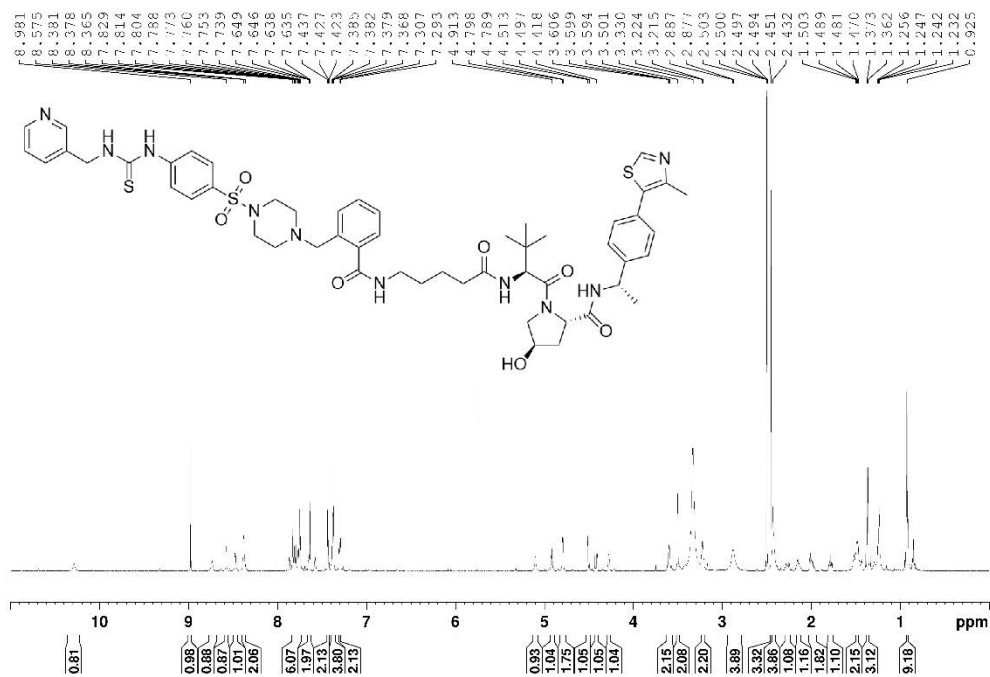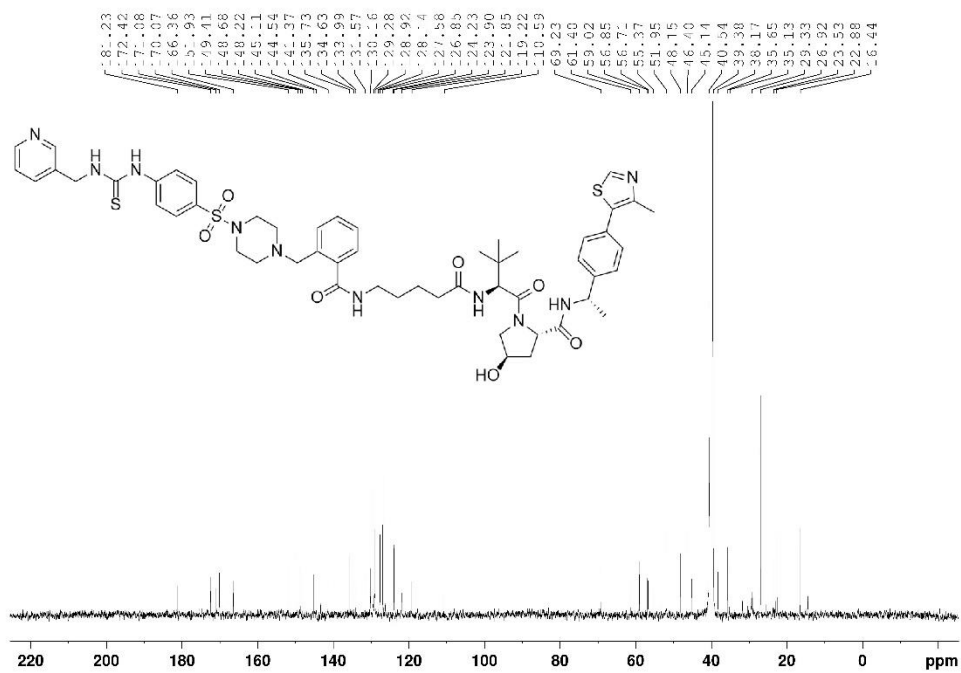

wy-16-6-2

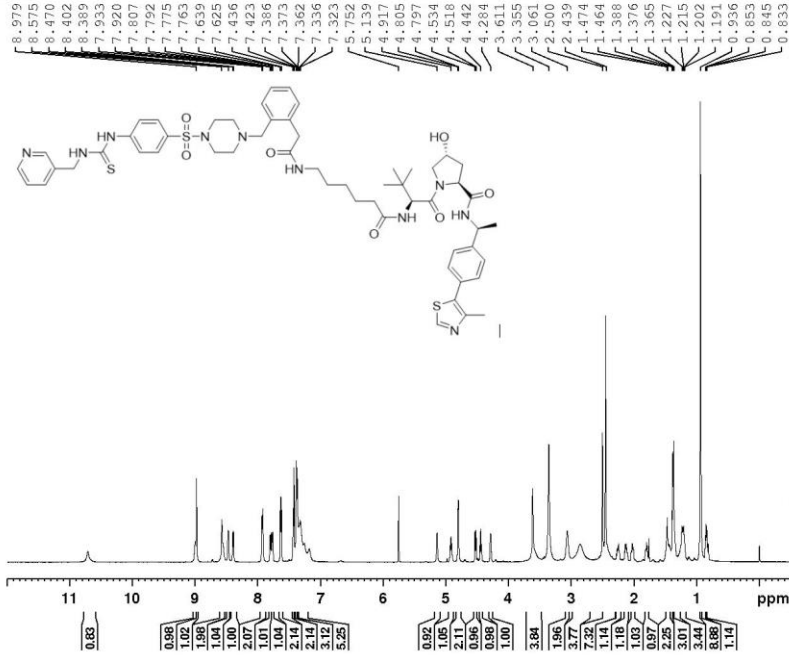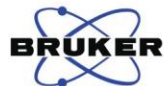

Current Data Parameters  
 NAME wy-16-6-2  
 EXPNO 111  
 PROCNO 1

F2 - Acquisition Parameters  
 Date\_ 20200619  
 Time 0.09  
 INSTRUM spect  
 PROBHD 5 mm PABBO BBI  
 PULPROG zg30  
 TD 65536  
 SOLVENT DMSO  
 NS 18  
 DS 0  
 SWH 12019.230 Hz  
 FIDRES 0.183399 Hz  
 AQ 2.7262976 sec  
 RG 90.5  
 DM 41.600 usec  
 DE 6.50 usec  
 TE 297.8 K  
 D1 1.00000000 sec  
 TDO 1

===== CHANNEL f1 =====  
 SF01 600.1329377 MHz  
 NUC1 1H  
 P1 13.70 usec  
 PLW1 19.34000015 W

F2 - Processing parameters  
 SI 65536  
 SF 600.1299991 MHz  
 MDW EM  
 SSB 0  
 LB 0 Hz  
 GB 0  
 PC 1.00

wy-16-6-2

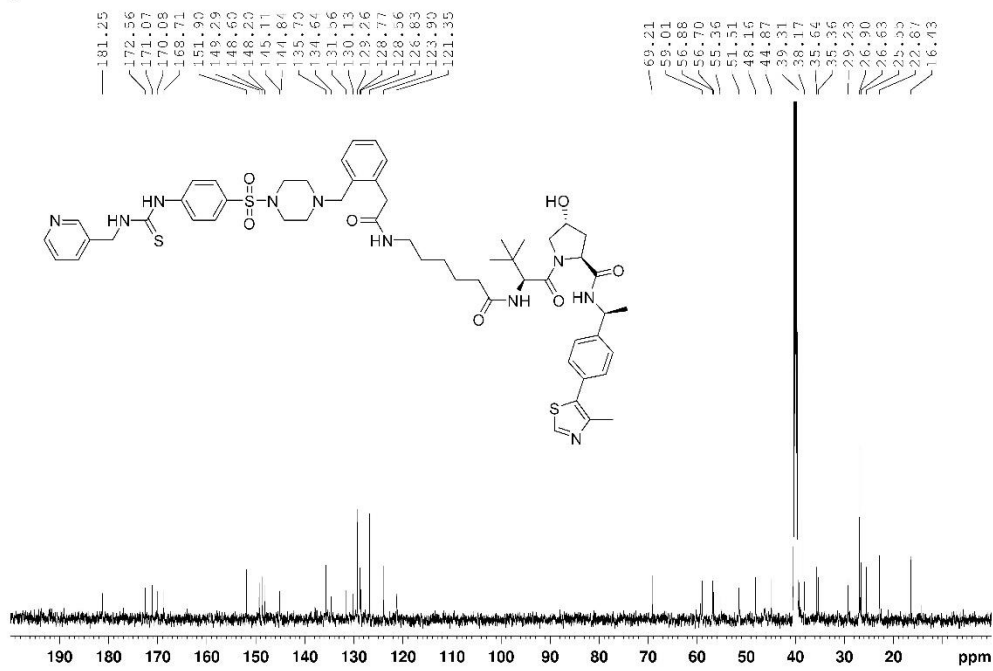

wy-16-7-2

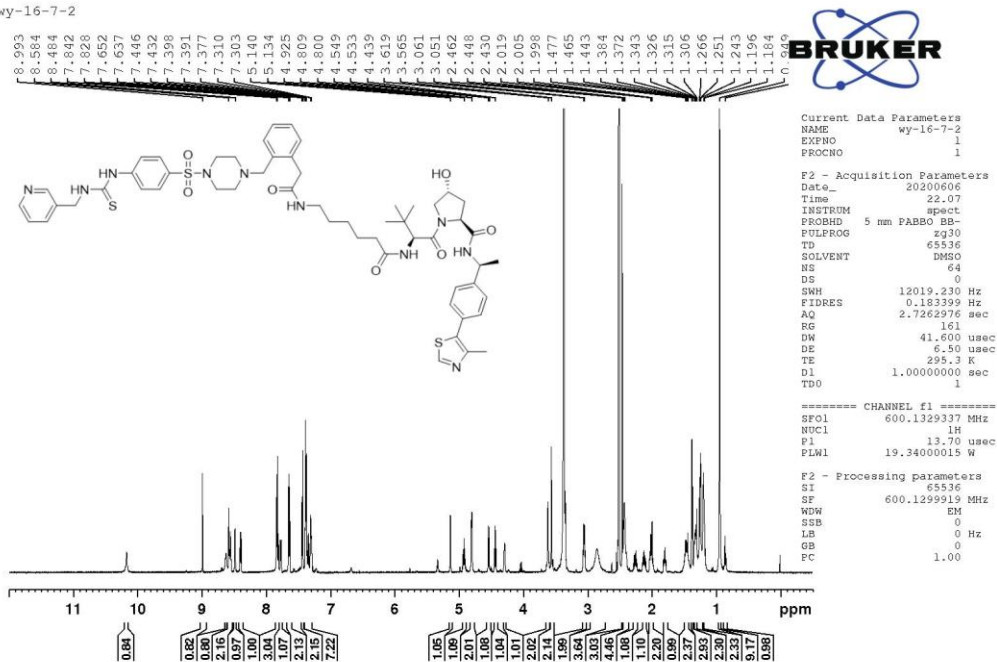

wy-16-7-2

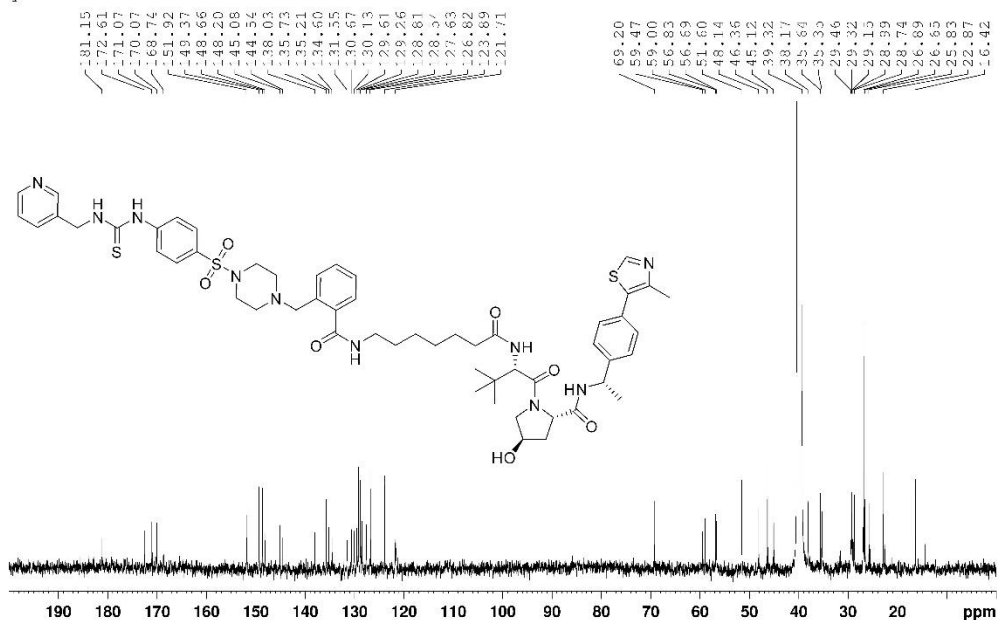

wy-16-8-2

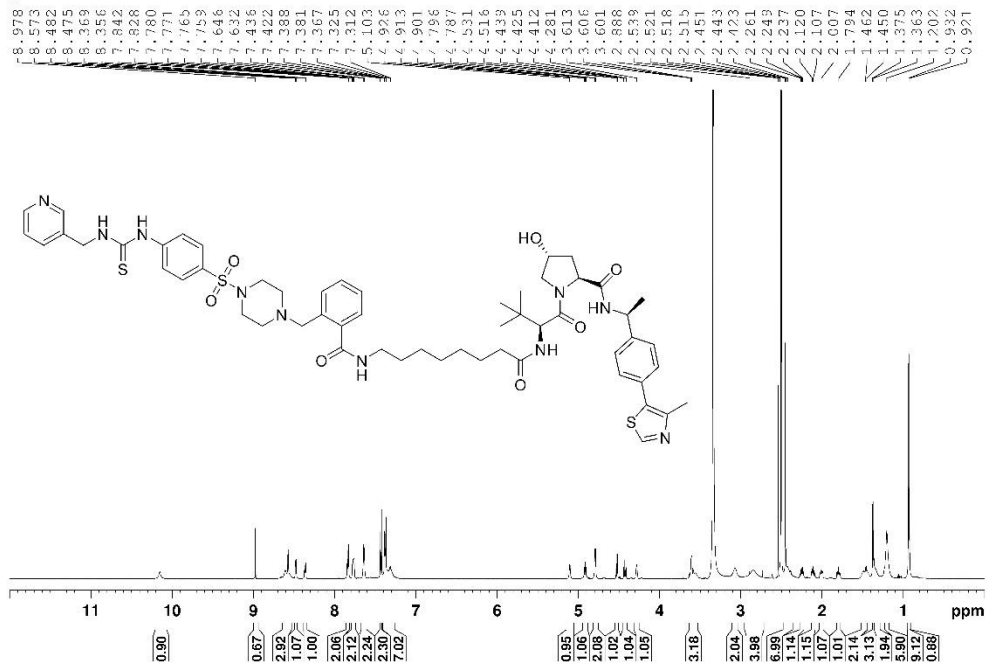

wy-16-8-2

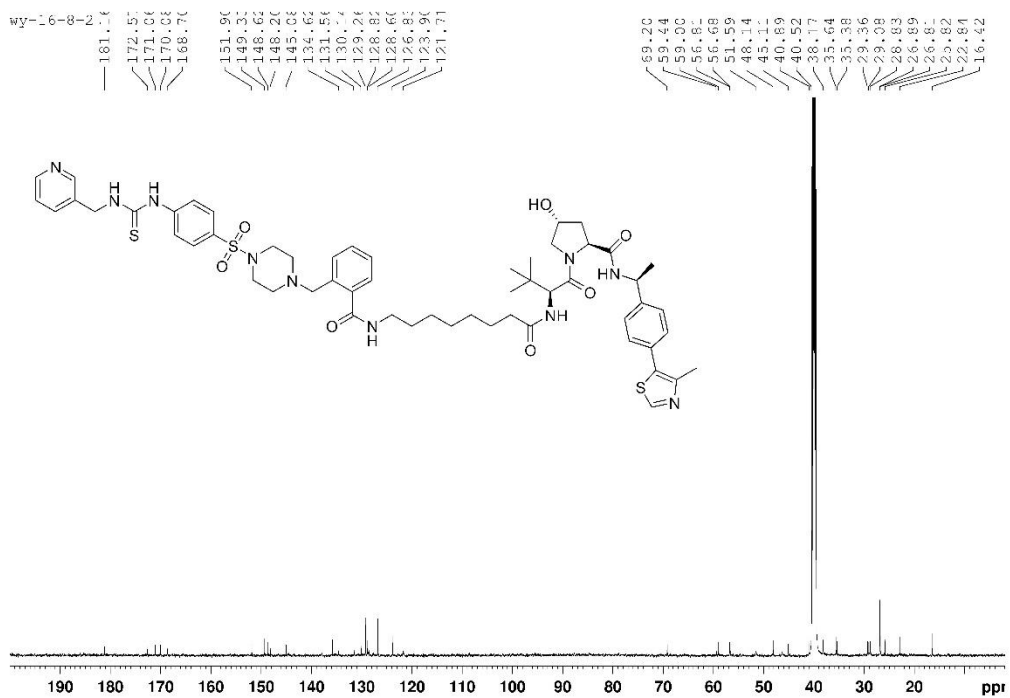

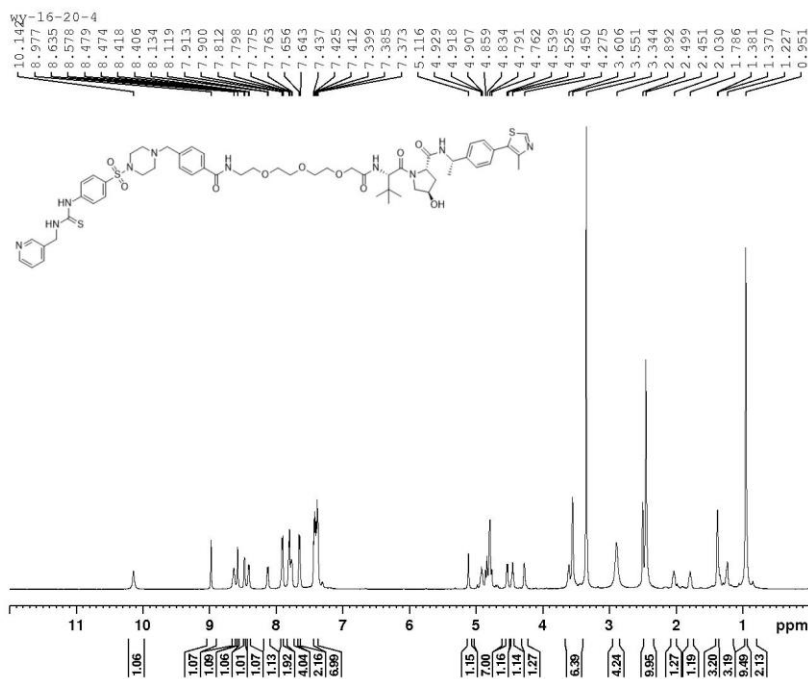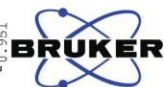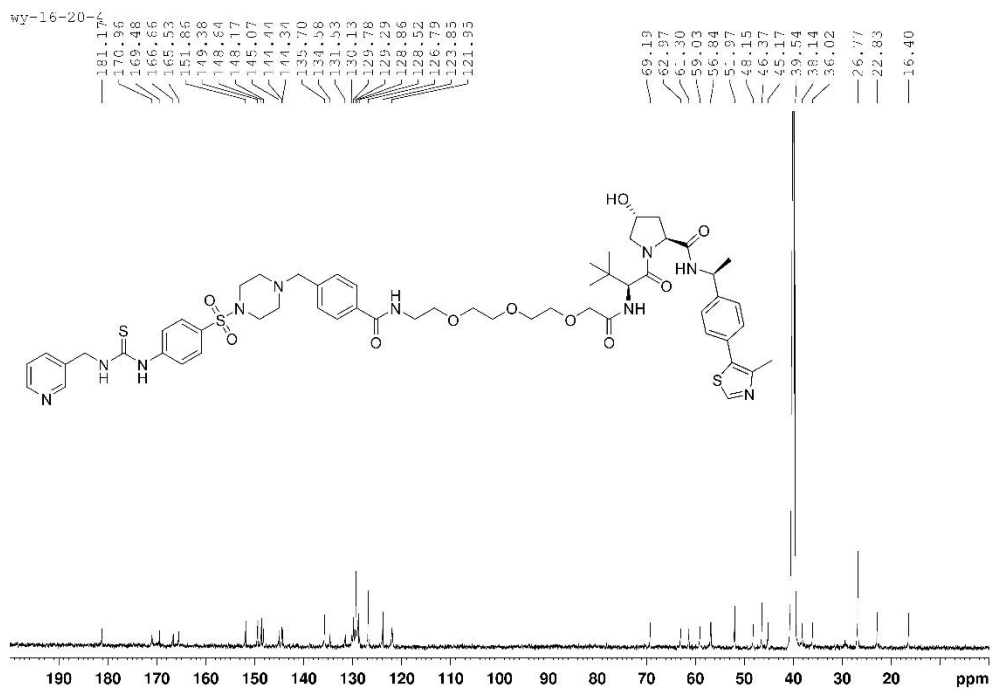



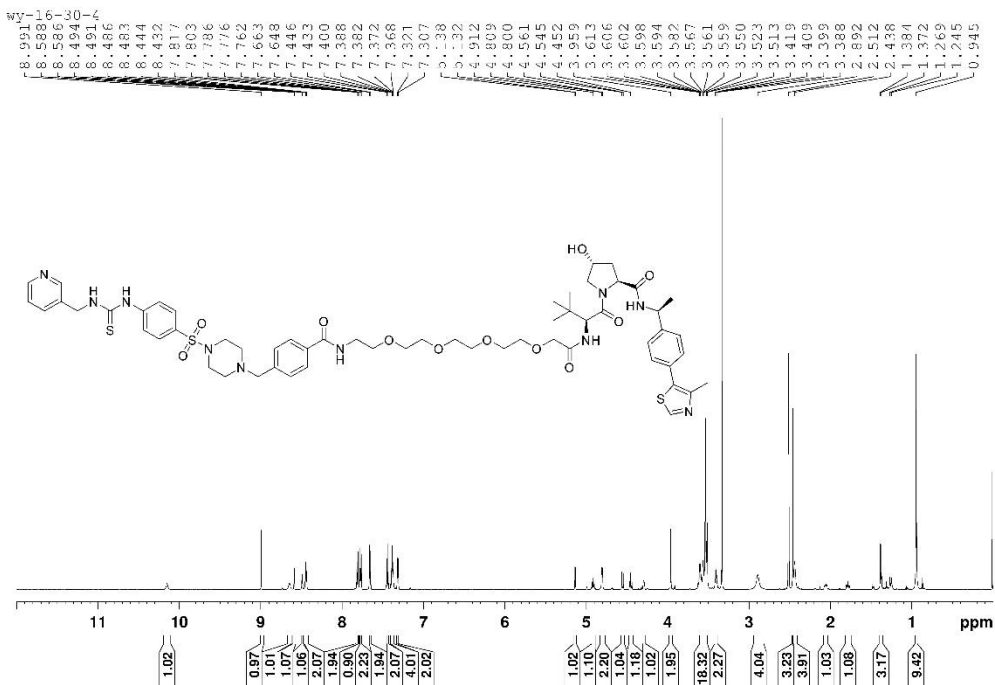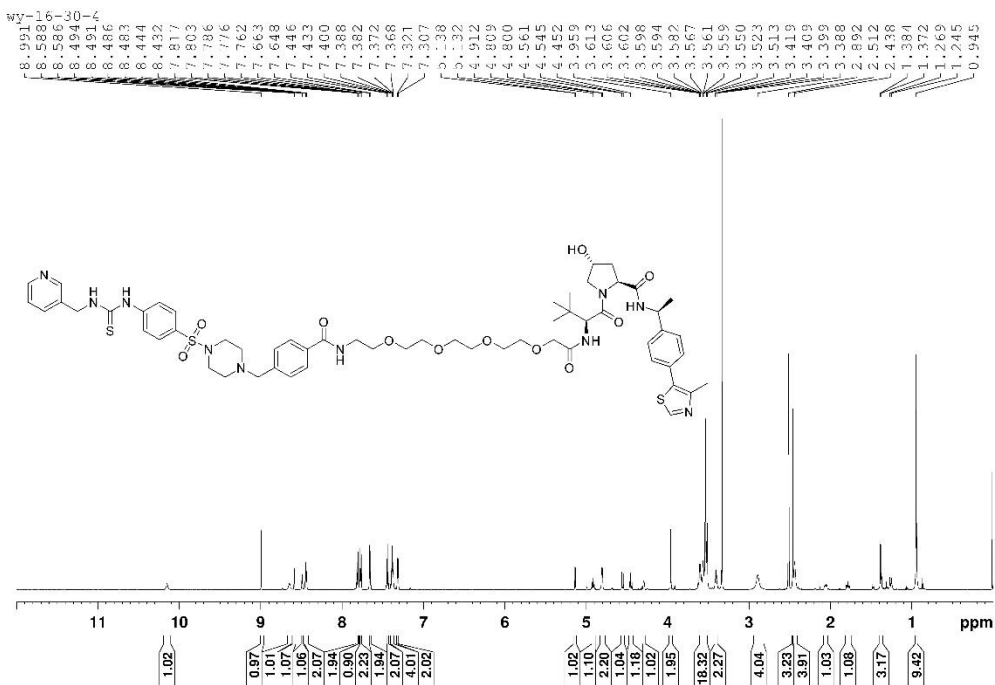

wy-re-protac

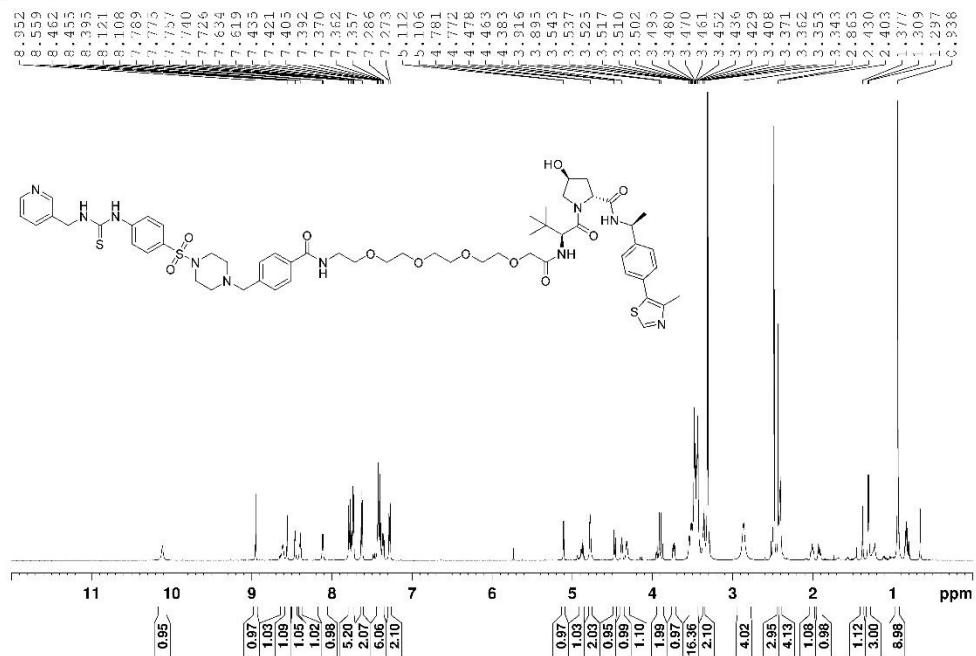

wy-re-protac

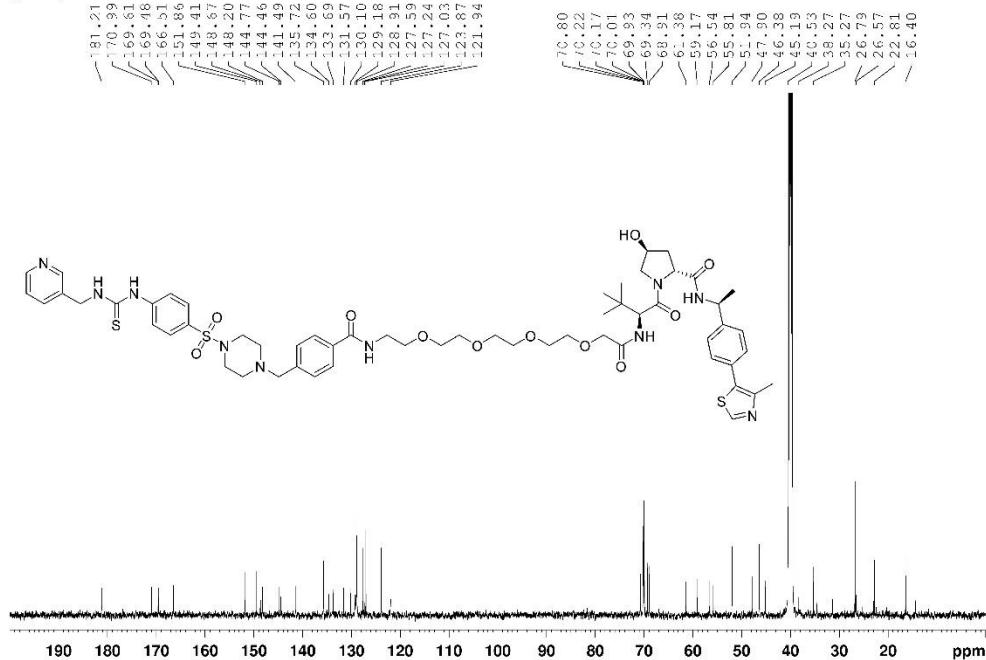



4-4

### Qualitative Analysis Report

Data Filename: WL-1644-DOWN.d      Sample Name  
 Sample Type: Sample      Position: P1-B2  
 Instrument Name: Instrument 1      User Name  
 Acq Method: TEST-POS-WL.m      Acquired Time: 11/5/2018 11:16:11 AM  
 IRM Calibration Status: Success      DA Method: 1.m  
 Comment:

Sample Group: Info.

#### User Spectra

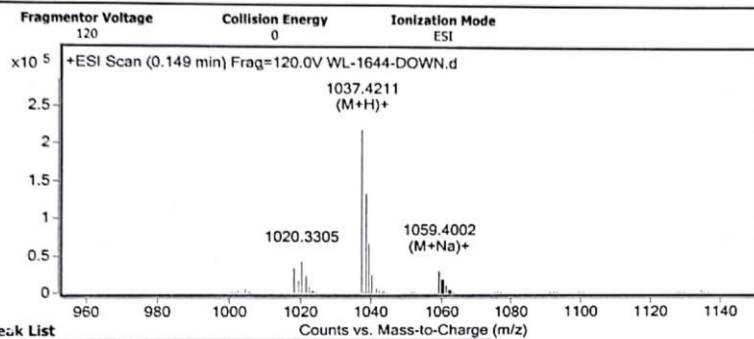

Peak List      Counts vs. Mass-to-Charge (m/z)

| m/z       | z | Abund     | Formula          | Ion    |
|-----------|---|-----------|------------------|--------|
| 150.1064  | 1 | 597236.5  |                  |        |
| 152.1019  | 1 | 186839    |                  |        |
| 254.5785  | 2 | 173572.4  |                  |        |
| 332.1446  | 1 | 307275.8  |                  |        |
| 346.4826  | 1 | 1220190.6 |                  |        |
| 346.8168  | 1 | 781629.7  |                  |        |
| 347.1492  |   | 410332.7  |                  |        |
| 519.2182  | 2 | 403379.6  |                  |        |
| 519.7171  | 2 | 250899.4  |                  |        |
| 1037.4211 | 1 | 218043.3  | C54 H67 N7 O8 S3 | (M+H)+ |

#### Formula Calculator Element Limits

| Element | Min | Max |
|---------|-----|-----|
| C       | 0   | 100 |
| H       | 0   | 200 |
| O       | 0   | 20  |
| N       | 0   | 10  |
| S       | 3   | 3   |

#### Formula Calculator Results

| Formula           | Best | Mass      | Tgt Mass  | Diff (ppm) | Ion Species          | Score |
|-------------------|------|-----------|-----------|------------|----------------------|-------|
| C52 H64 N10 O7 S3 | TRUE | 1036.4138 | 1036.4122 | -1.57      | C52 H65 N10 O7 S3    | 96.52 |
| C52 H64 N10 O7 S3 | TRUE | 1036.4108 | 1036.4122 | 1.31       | C52 H64 N10 Na O7 S3 | 97.32 |

--- End Of Report ---

## Qualitative Analysis Report

|                        |               |               |                       |
|------------------------|---------------|---------------|-----------------------|
| Data Filename          | WY-46-4-3.d   | Sample Name   |                       |
| Sample Type            | Sample        | Position      | P1-B5                 |
| Instrument Name        | Instrument 1  | User Name     |                       |
| Acq Method             | TEST-POS-WL.m | Acquired Time | 12/21/2018 3:20:16 PM |
| IRM Calibration Status | Success       | DA Method     | Default.m             |
| Comment                |               |               |                       |

Sample Group      Info.

### User Spectra

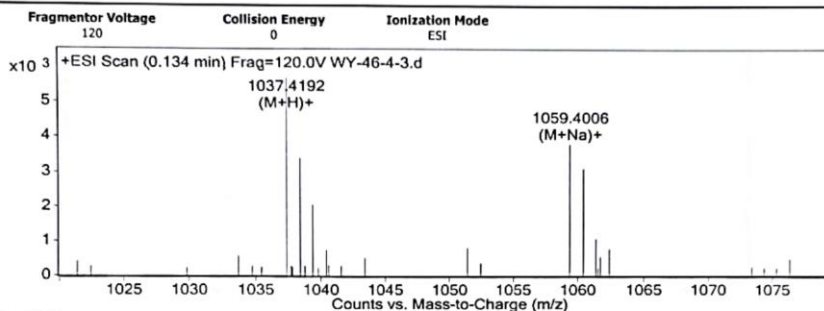

#### Peak List

| m/z      | z | Abund    |
|----------|---|----------|
| 102.1273 | 1 | 74248    |
| 130.1591 | 1 | 229474.8 |
| 239.2359 | 1 | 71746    |
| 257.2478 | 1 | 61538.4  |
| 283.2637 | 1 | 71105.9  |
| 285.2795 | 1 | 60575.3  |
| 331.285  | 1 | 55004.6  |
| 346.4795 | 1 | 58636.2  |
| 369.3524 | 1 | 61873.1  |
| 437.194  | 1 | 68196.8  |

#### Formula Calculator Element Limits

| Element | Min | Max |
|---------|-----|-----|
| C       | 3   | 80  |
| H       | 0   | 120 |
| O       | 0   | 30  |
| N       | 0   | 30  |
| S       | 1   | 3   |

#### Formula Calculator Results

| Formula           | Best | Mass      | Tgt Mass  | Diff (ppm) | Ion Species         | Score |
|-------------------|------|-----------|-----------|------------|---------------------|-------|
| C52 H64 N10 O7 S3 | TRUE | 1036.412  | 1036.4122 | 0.19       | C52 H65 N10 O7 S3   | 95.59 |
| C64 H52 N12 O S   | TRUE | 1036.4114 | 1036.4108 | -0.61      | C64 H52 N12 Na O S  | 84    |
| C67 H60 N2 O7 S   |      | 1036.4113 | 1036.4121 | 0.8        | C67 H60 N2 Na O7 S  | 82.17 |
| C49 H48 N24 O2 S  |      | 1036.4116 | 1036.4113 | -0.31      | C49 H48 N24 Na O2 S | 81.15 |
| C63 H56 N8 O5 S   |      | 1036.4114 | 1036.4094 | -1.86      | C63 H56 N8 Na O5 S  | 80.59 |
| C79 H56 S         |      | 1036.4113 | 1036.4103 | -0.96      | C79 H56 Na S        | 80.53 |
| C68 H56 N6 O3 S   |      | 1036.4113 | 1036.4135 | 2.05       | C68 H56 N6 Na O3 S  | 80.18 |

--- End Of Report ---

## Qualitative Analysis Report

|                        |               |               |                       |
|------------------------|---------------|---------------|-----------------------|
| Data Filename          | WY-16-4-2.d   | Sample Name   |                       |
| Sample Type            | Sample        | Position      | P1-B7                 |
| Instrument Name        | Instrument 1  | User Name     |                       |
| Acq Method             | TEST-POS-WL.m | Acquired Time | 12/21/2018 3:23:27 PM |
| IRM Calibration Status | Success       | DA Method     | Default.m             |
| Comment                |               |               |                       |
| Sample Group           | Info.         |               |                       |

### User Spectra

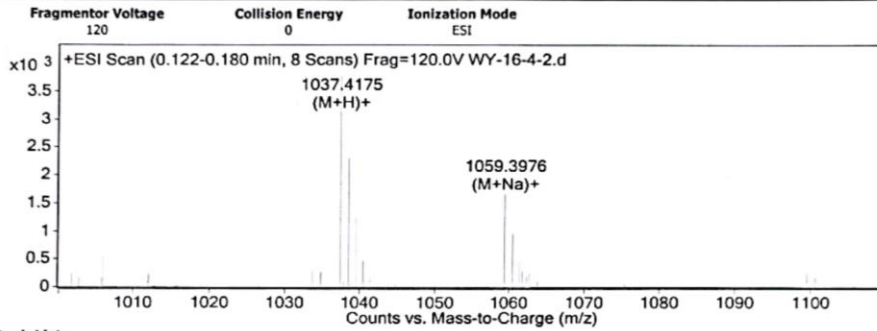

#### Peak List

| m/z      | z | Abund    |
|----------|---|----------|
| 130.1605 | 1 | 391633.8 |
| 239.2369 | 1 | 63927.1  |
| 257.2479 | 1 | 65031.4  |
| 267.2684 | 1 | 55264.2  |
| 274.2743 | 1 | 49621    |
| 283.2639 | 1 | 79932.6  |
| 285.2797 | 1 | 61974.8  |
| 369.3523 | 1 | 66636.4  |
| 415.2121 | 1 | 59390.5  |
| 437.1942 | 1 | 84760.8  |

#### Formula Calculator Element Limits

| Element | Min | Max |
|---------|-----|-----|
| C       | 3   | 80  |
| H       | 0   | 120 |
| O       | 0   | 30  |
| N       | 0   | 30  |
| S       | 1   | 3   |

#### Formula Calculator Results

| Formula            | Best | Mass      | Tgt Mass  | Diff (ppm) | Ion Species          | Score |
|--------------------|------|-----------|-----------|------------|----------------------|-------|
| C49 H56 N20 O S3   |      | 1036.4103 | 1036.4108 | 0.53       | C49 H57 N20 O S3     | 99.28 |
| C48 H60 N16 O5 S3  |      | 1036.4102 | 1036.4095 | -0.74      | C48 H61 N16 O5 S3    | 99.2  |
| C51 H68 N6 O11 S3  |      | 1036.4102 | 1036.4108 | 0.64       | C51 H69 N6 O11 S3    | 99.16 |
| C50 H72 N2 O15 S3  |      | 1036.4101 | 1036.4095 | -0.62      | C50 H73 N2 O15 S3    | 98.6  |
| C58 H68 O13 S2     |      | 1036.4101 | 1036.4101 | 0.08       | C58 H69 O13 S2       | 98.21 |
| C52 H64 N10 O7 S3  | TRUE | 1036.4102 | 1036.4122 | 1.91       | C52 H65 N10 O7 S3    | 96.66 |
| C56 H56 N14 O3 S2  |      | 1036.4102 | 1036.4101 | -0.04      | C56 H57 N14 O3 S2    | 96.39 |
| C43 H64 N12 O14 S2 |      | 1036.4102 | 1036.4106 | 0.43       | C43 H65 N12 O14 S2   | 96.16 |
| C55 H60 N10 O7 S2  |      | 1036.4101 | 1036.4088 | -1.3       | C55 H61 N10 O7 S2    | 96.1  |
| C47 H64 N12 O9 S3  |      | 1036.4102 | 1036.4081 | -2.01      | C47 H65 N12 O9 S3    | 96.07 |
| C47 H64 N12 O9 S3  | TRUE | 1036.4086 | 1036.4081 | -0.48      | C47 H64 N12 Na O9 S3 | 96.87 |

# Qualitative Analysis Report

5-2

|                               |                 |                      |                       |
|-------------------------------|-----------------|----------------------|-----------------------|
| <b>Data Filename</b>          | WY-16-5-2-pos.d | <b>Sample Name</b>   |                       |
| <b>Sample Type</b>            | Sample          | <b>Position</b>      | PI-B3                 |
| <b>Instrument Name</b>        | Instrument 1    | <b>User Name</b>     |                       |
| <b>Acq Method</b>             | TEST-POS-WL.m   | <b>Acquired Time</b> | 11/27/2018 2:16:54 PM |
| <b>IRM Calibration Status</b> | Success         | <b>DA Method</b>     | 1.m                   |
| <b>Comment</b>                |                 |                      |                       |

**Sample Group**      **Info.**

## User Spectra

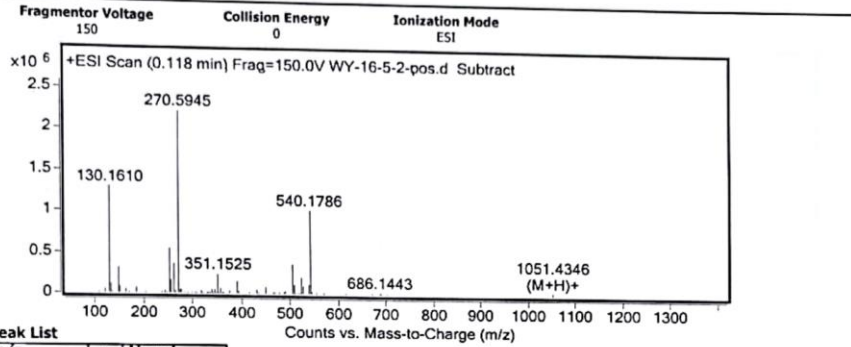

### Peak List

| m/z      | z | Abund     |
|----------|---|-----------|
| 130.161  |   | 1296849.4 |
| 149.0608 |   | 305581.6  |
| 253.5995 | 2 | 546311.6  |
| 262.6044 | 2 | 358224.1  |
| 270.5946 | 2 | 2228949   |
| 271.0954 | 2 | 691991.6  |
| 271.5918 | 2 | 294586.2  |
| 506.1893 |   | 356574.3  |
| 540.1787 | 1 | 1027384.4 |
| 541.1792 | 1 | 319474.6  |

### Formula Calculator Element Limits

| Element | Min | Max |
|---------|-----|-----|
| C       | 0   | 60  |
| H       | 0   | 200 |
| O       | 0   | 10  |
| N       | 0   | 10  |
| S       | 0   | 3   |

### Formula Calculator Results

| Formula           | Best | Mass     | Tgt Mass  | Diff (ppm) | Ion Species       | Score |
|-------------------|------|----------|-----------|------------|-------------------|-------|
| C53 H66 N10 O7 S3 | TRUE | 1050.427 | 1050.4278 | 0.72       | C53 H67 N10 O7 S3 | 97.05 |

--- End Of Report ---

# Qualitative Analysis Report

5-24

|                        |               |               |                        |
|------------------------|---------------|---------------|------------------------|
| Data Filename          | wy-16-3-4.d   | Sample Name   |                        |
| Sample Type            | Sample        | Position      | P1-A1                  |
| Instrument Name        | Instrument 1  | User Name     |                        |
| Acq Method             | TEST-POS-WL.m | Acquired Time | 11/14/2018 10:42:17 AM |
| IRM Calibration Status | Success       | DA Method     | 1.m                    |
| Comment                |               |               |                        |
| Sample Group           | Info.         |               |                        |

## User Spectra

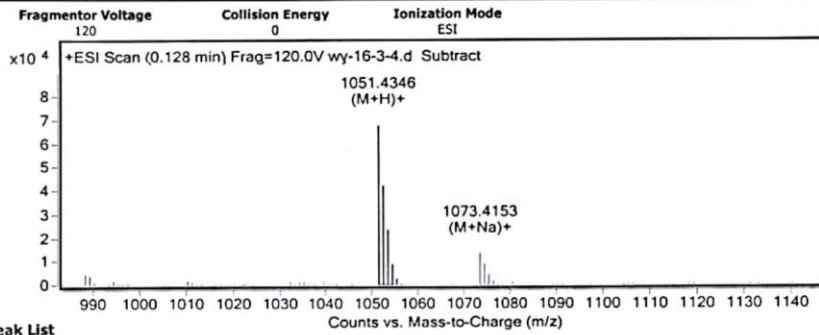

### Peak List

| m/z      | z | Abund    |
|----------|---|----------|
| 130.1592 | 1 | 144737   |
| 163.1331 | 1 | 122827.8 |
| 274.2744 | 1 | 130406.8 |
| 280.1296 | 1 | 142290.4 |
| 338.3419 | 1 | 113377.3 |
| 351.1527 | 1 | 312334.9 |
| 351.4862 | 1 | 188228.1 |
| 526.2222 | 2 | 136549.7 |
| 574.2819 | 1 | 697019.6 |
| 575.282  | 1 | 229315.8 |

### Formula Calculator Element Limits

| Element | Min | Max |
|---------|-----|-----|
| C       | 0   | 60  |
| H       | 0   | 200 |
| O       | 0   | 20  |
| N       | 0   | 10  |
| S       | 3   | 3   |

### Formula Calculator Results

| Formula           | Best | Mass      | Tgt Mass  | Diff (ppm) | Ion Species          | Score |
|-------------------|------|-----------|-----------|------------|----------------------|-------|
| C53 H66 N10 O7 S3 | TRUE | 1050.4273 | 1050.4278 | 0.52       | C53 H67 N10 O7 S3    | 98.74 |
| C53 H66 N10 O7 S3 | TRUE | 1050.4259 | 1050.4278 | 1.8        | C53 H66 N10 Na O7 S3 | 94.33 |

--- End Of Report ---



## Qualitative Analysis Report

|                        |               |               |                       |
|------------------------|---------------|---------------|-----------------------|
| Data Filename          | WY-16-5-4.d   | Sample Name   |                       |
| Sample Type            | Sample        | Position      | P1-B6                 |
| Instrument Name        | Instrument 1  | User Name     |                       |
| Acq Method             | TEST-POS-WL.m | Acquired Time | 12/21/2018 3:21:53 PM |
| IRM Calibration Status | Success       | DA Method     | Default.m             |
| Comment                |               |               |                       |

Sample Group      Info.

### User Spectra

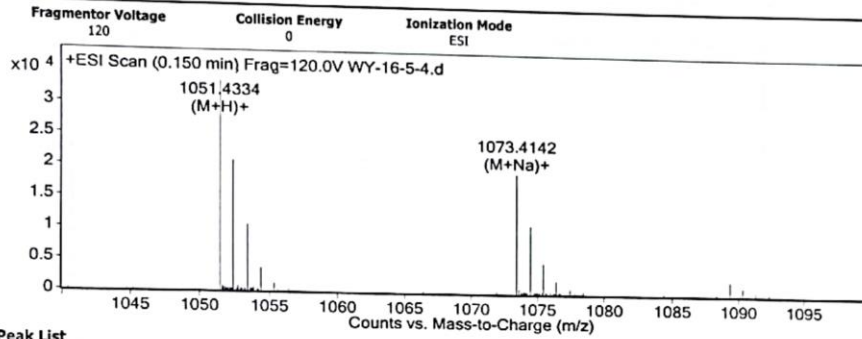

#### Peak List

| m/z      | z | Abund    |
|----------|---|----------|
| 130.1608 | 1 | 452745.9 |
| 136.0508 |   | 110095.6 |
| 274.2739 | 1 | 93721.3  |
| 283.2637 | 1 | 86906    |
| 318.3002 | 1 | 94702.5  |
| 351.1519 | 1 | 205352.2 |
| 351.4856 |   | 143253.3 |
| 351.818  |   | 79197.2  |
| 526.2216 | 2 | 113773.1 |
| 608.2881 | 1 | 162641.5 |

#### Formula Calculator Element Limits

| Element | Min | Max |
|---------|-----|-----|
| C       |     | 80  |
| H       | 0   | 120 |
| O       | 0   | 30  |
| N       | 0   | 30  |
| S       | 1   | 3   |

#### Formula Calculator Results

| Formula            | Best | Mass      | Tgt Mass  | Diff (ppm) | Ion Species         | Score |
|--------------------|------|-----------|-----------|------------|---------------------|-------|
| C50 H58 N20 O S3   |      | 1050.4259 | 1050.4265 | 0.5        | C50 H59 N20 O S3    | 98.57 |
| C49 H62 N16 O5 S3  |      | 1050.4259 | 1050.4251 | -0.75      | C49 H63 N16 O5 S3   | 98.17 |
| C59 H70 O13 S2     |      | 1050.4257 | 1050.4258 | 0.05       | C59 H71 O13 S2      | 97.77 |
| C52 H70 N6 O11 S3  |      | 1050.4258 | 1050.4265 | 0.61       | C52 H71 N6 O11 S3   | 97.31 |
| C42 H54 N26 O4 S2  |      | 1050.426  | 1050.4263 | 0.28       | C42 H55 N26 O4 S2   | 97.26 |
| C44 H66 N12 O14 S2 |      | 1050.4259 | 1050.4263 | 0.4        | C44 H67 N12 O14 S2  | 97.04 |
| C57 H58 N14 O3 S2  |      | 1050.4258 | 1050.4258 | -0.06      | C57 H59 N14 O3 S2   | 96.98 |
| C56 H62 N10 O7 S2  |      | 1050.4258 | 1050.4244 | -1.31      | C56 H63 N10 O7 S2   | 96.46 |
| C51 H74 N2 O15 S3  |      | 1050.4258 | 1050.4251 | -0.63      | C51 H75 N2 O15 S3   | 96.45 |
| C41 H58 N22 O8 S2  |      | 1050.426  | 1050.4249 | -0.97      | C41 H59 N22 O8 S2   | 96.03 |
| C50 H70 N2 O20 S   | TRUE | 1050.4251 | 1050.4243 | -0.83      | C50 H70 N2 Na O20 S | 97.62 |

## Qualitative Analysis Report

A-2

|                        |               |               |                        |
|------------------------|---------------|---------------|------------------------|
| Data Filename          | WY-6-2.d      | Sample Name   |                        |
| Sample Type            | Sample        | Position      | PI-A9                  |
| Instrument Name        | Instrument 1  | User Name     |                        |
| Acq Method             | TEST-POS-WL.m | Acquired Time | 11/27/2018 12:48:08 PM |
| IRM Calibration Status | Success       | DA Method     | 1.m                    |
| Comment                |               |               |                        |

Sample Group      Info.

### User Spectra

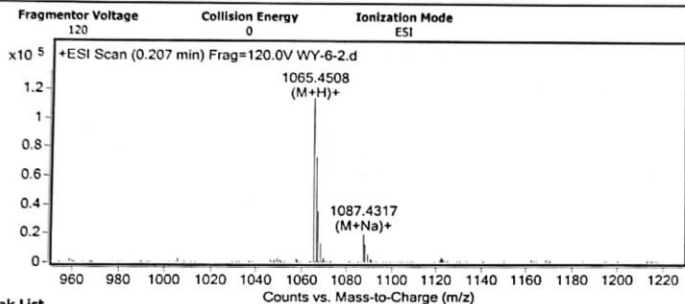

#### Peak List

| m/z      | z | Abund     |
|----------|---|-----------|
| 274.277  | 1 | 489947.3  |
| 302.3057 | 1 | 114393.4  |
| 318.3021 | 1 | 273268.3  |
| 355.8262 | 1 | 1061775.9 |
| 356.1606 | 1 | 696861.6  |
| 356.4922 | 1 | 383640    |
| 356.8243 | 1 | 139579.8  |
| 533.2331 | 2 | 357800.1  |
| 533.7327 | 2 | 229101.3  |
| 534.2308 | 2 | 124255.8  |

#### Formula Calculator Element Limits

| Element | Min | Max |
|---------|-----|-----|
| C       | 0   | 60  |
| H       | 0   | 200 |
| O       | 1   | 10  |
| N       | 0   | 10  |
| S       | 0   | 3   |

#### Formula Calculator Results

| Formula           | Best | Mass      | Tgt Mass  | Diff (ppm) | Ion Species          | Score |
|-------------------|------|-----------|-----------|------------|----------------------|-------|
| C54 H68 N10 O7 S3 | TRUE | 1064.4433 | 1064.4435 | 0.12       | C54 H69 N10 O7 S3    | 97.69 |
| C54 H68 N10 O7 S3 | TRUE | 1064.4421 | 1064.4435 | 1.25       | C54 H68 N10 Na O7 S3 | 91.62 |

--- End Of Report ---

## Qualitative Analysis Report

|                               |               |                      |                        |
|-------------------------------|---------------|----------------------|------------------------|
| <b>Data Filename</b>          | WY-16-6-3.d   | <b>Sample Name</b>   |                        |
| <b>Sample Type</b>            | Sample        | <b>Position</b>      | P1-A7                  |
| <b>Instrument Name</b>        | Instrument 1  | <b>User Name</b>     |                        |
| <b>Acq Method</b>             | TEST-POS-WL.m | <b>Acquired Time</b> | 12/12/2018 10:29:37 AM |
| <b>IRM Calibration Status</b> | Success       | <b>DA Method</b>     | 1.m                    |
| <b>Comment</b>                |               |                      |                        |
| <b>Sample Group</b>           | Info.         |                      |                        |

### User Spectra

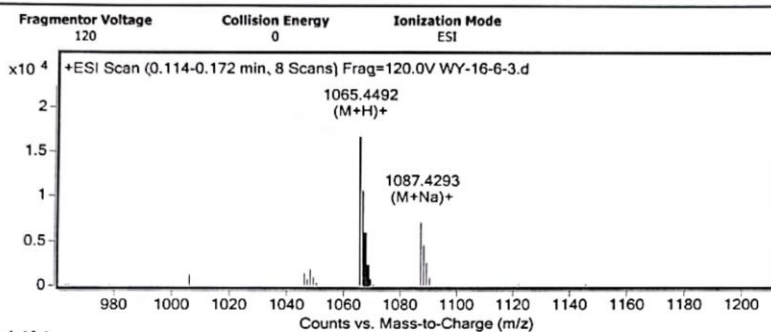

#### Peak List

| m/z      | z | Abund     |
|----------|---|-----------|
| 130.1634 | 1 | 6028415.5 |
| 131.1644 | 1 | 736262.8  |
| 136.0504 | 1 | 43294.7   |
| 295.2886 | 1 | 265551.5  |
| 296.2906 | 1 | 46558.8   |
| 297.2851 | 1 | 84263.2   |
| 338.3417 | 1 | 43707.6   |
| 355.8235 | 1 | 109242.2  |
| 356.1576 | 1 | 74718.3   |
| 373.3039 | 1 | 67458     |

#### Formula Calculator Element Limits

| Element | Min | Max |
|---------|-----|-----|
| C       | 3   | 60  |
| H       | 0   | 120 |
| O       | 0   | 20  |
| N       | 0   | 10  |
| S       | 3   | 3   |

#### Formula Calculator Results

| Formula           | Best | Mass      | Tgt Mass  | Diff (ppm) | Ion Species          | Score |
|-------------------|------|-----------|-----------|------------|----------------------|-------|
| C54 H68 N10 O7 S3 | TRUE | 1064.4403 | 1064.4435 | 2.93       | C54 H68 N10 Na O7 S3 | 90.59 |
| C54 H68 N10 O7 S3 | TRUE | 1064.4417 | 1064.4435 | 1.64       | C54 H69 N10 O7 S3    | 96.85 |

--- End Of Report ---

## Qualitative Analysis Report

|                               |               |                      |                        |
|-------------------------------|---------------|----------------------|------------------------|
| <b>Data Filename</b>          | WY-16-6-4.d   | <b>Sample Name</b>   |                        |
| <b>Sample Type</b>            | Sample        | <b>Position</b>      | PI-B1                  |
| <b>Instrument Name</b>        | Instrument 1  | <b>User Name</b>     |                        |
| <b>Acq Method</b>             | TEST-POS-WL.m | <b>Acquired Time</b> | 11/22/2018 11:11:02 AM |
| <b>IRM Calibration Status</b> | Success       | <b>DA Method</b>     | 1.m                    |
| <b>Comment</b>                |               |                      |                        |

Sample Group      Info.

### User Spectra

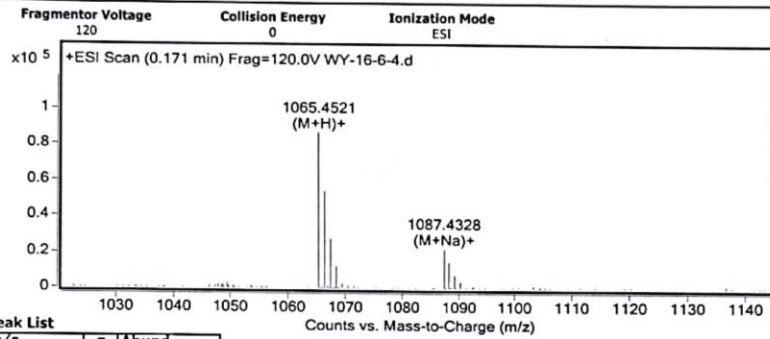

#### Peak List

| m/z      | z | Abund    |
|----------|---|----------|
| 163.1333 |   | 86480.9  |
| 332.1446 | 1 | 232274.8 |
| 338.3435 | 1 | 233186.6 |
| 355.8261 | 1 | 436872.4 |
| 356.1587 | 1 | 289650.8 |
| 356.492  |   | 142558.5 |
| 367.6633 | 2 | 122868.7 |
| 533.2321 | 2 | 236132.2 |
| 533.7328 | 2 | 165129.4 |
| 534.2323 | 2 | 87010.5  |

#### Formula Calculator Element Limits

| Element | Min | Max |
|---------|-----|-----|
| C       | 0   | 60  |
| H       | 0   | 200 |
| O       | 0   | 10  |
| N       | 0   | 10  |
| S       | 3   | 3   |
| F       | 0   | 1   |

#### Formula Calculator Results

| Formula           | Best | Mass      | Tgt Mass  | Diff (ppm) | Ion Species          | Score |
|-------------------|------|-----------|-----------|------------|----------------------|-------|
| C54 H68 N10 O7 S3 | TRUE | 1064.4445 | 1064.4435 | -0.95      | C54 H69 N10 O7 S3    | 97.3  |
| C54 H68 N10 O7 S3 | TRUE | 1064.4429 | 1064.4435 | 0.5        | C54 H68 N10 Na O7 S3 | 95.85 |

--- End Of Report ---

## Qualitative Analysis Report

|                        |               |               |                        |
|------------------------|---------------|---------------|------------------------|
| Data Filename          | WY-16-7-2.d   | Sample Name   |                        |
| Sample Type            | Sample        | Position      | P1-B4                  |
| Instrument Name        | Instrument 1  | User Name     |                        |
| Acq Method             | TEST-POS-WL.m | Acquired Time | 12/12/2018 10:39:13 AM |
| IRM Calibration Status | Success       | DA Method     | 1.m                    |
| Comment                |               |               |                        |
| Sample Group           | Info.         |               |                        |

### User Spectra

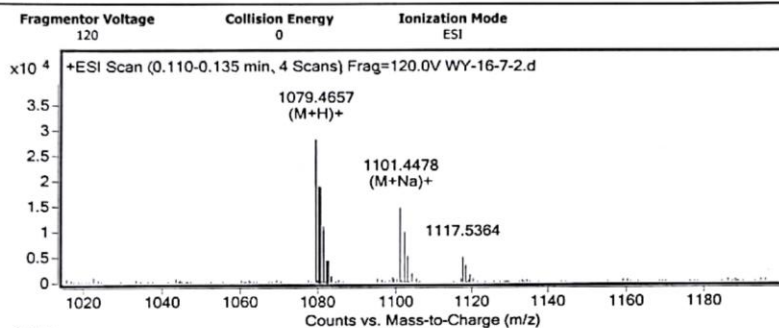

#### Peak List

| m/z      | z | Abund    |
|----------|---|----------|
| 163.1331 | 1 | 205581.1 |
| 185.1148 | 1 | 69674.9  |
| 338.344  | 1 | 303360.4 |
| 339.3451 | 1 | 74379.5  |
| 360.4971 | 1 | 448783.8 |
| 360.8308 | 1 | 299467.4 |
| 361.1632 | 1 | 149886.2 |
| 437.1938 | 1 | 87962.2  |
| 540.2392 | 2 | 134560.8 |
| 540.7398 | 2 | 93174    |

#### Formula Calculator Element Limits

| Element | Min | Max |
|---------|-----|-----|
| C       | 3   | 60  |
| H       | 0   | 120 |
| O       | 0   | 10  |
| N       | 0   | 10  |
| S       | 3   | 3   |

#### Formula Calculator Results

| Formula           | Best | Mass      | Tgt Mass  | Diff (ppm) | Ion Species          | Score |
|-------------------|------|-----------|-----------|------------|----------------------|-------|
| C55 H70 N10 O7 S3 | TRUE | 1078.4585 | 1078.4591 | 0.55       | C55 H70 N10 Na O7 S3 | 95.89 |
| C55 H70 N10 O7 S3 | TRUE | 1078.4584 | 1078.4591 | 0.63       | C55 H71 N10 O7 S3    | 98.63 |

--- End Of Report ---

## Qualitative Analysis Report

|                        |               |               |                        |
|------------------------|---------------|---------------|------------------------|
| Data Filename          | WY-16-7-3.d   | Sample Name   |                        |
| Sample Type            | Sample        | Position      | P1-B3                  |
| Instrument Name        | Instrument 1  | User Name     |                        |
| Acq Method             | TEST-POS-WL.m | Acquired Time | 12/12/2018 10:37:40 AM |
| IRM Calibration Status | Success       | DA Method     | 1.m                    |
| Comment                |               |               |                        |

Sample Group      Info.

### User Spectra

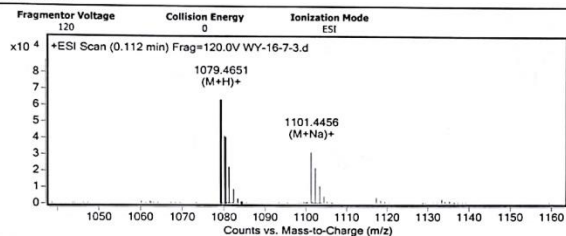

#### Peak List

| m/z      | z | Abund    |
|----------|---|----------|
| 130.1609 | 1 | 779102.6 |
| 163.1331 | 1 | 199364.8 |
| 332.1428 | 1 | 120873.9 |
| 338.3428 | 1 | 254406.2 |
| 360.4972 | 1 | 483616.3 |
| 360.8307 | 2 | 325578.9 |
| 361.1637 | 1 | 166039.6 |
| 437.1939 | 1 | 93817.5  |
| 540.2391 | 2 | 192698.8 |
| 540.7405 | 2 | 129686.3 |

#### Formula Calculator Element Limits

| Element | Min | Max |
|---------|-----|-----|
| C       | 3   | 60  |
| H       | 0   | 120 |
| O       | 0   | 10  |
| N       | 0   | 10  |
| S       | 3   | 3   |

#### Formula Calculator Results

| Formula           | Best | Mass      | Tgt Mass  | Diff (ppm) | Ion Species          | Score |
|-------------------|------|-----------|-----------|------------|----------------------|-------|
| C55 H70 N10 O7 S3 | TRUE | 1078.4567 | 1078.4591 | 2.26       | C55 H70 N10 Na O7 S3 | 92.99 |
| C55 H70 N10 O7 S3 | TRUE | 1078.4575 | 1078.4591 | 1.48       | C55 H71 N10 O7 S3    | 96.15 |

--- End Of Report ---

## Qualitative Analysis Report

|                               |                 |                      |                        |
|-------------------------------|-----------------|----------------------|------------------------|
| <b>Data Filename</b>          | WY-16-7-4-pos.d | <b>Sample Name</b>   |                        |
| <b>Sample Type</b>            | Sample          | <b>Position</b>      | P1-B1                  |
| <b>Instrument Name</b>        | Instrument 1    | <b>User Name</b>     |                        |
| <b>Acq Method</b>             | TEST-POS-WL.m   | <b>Acquired Time</b> | 12/12/2018 12:19:36 PM |
| <b>IRM Calibration Status</b> | Success         | <b>DA Method</b>     | 1.m                    |
| <b>Comment</b>                |                 |                      |                        |
| <b>Sample Group</b>           | <b>Info.</b>    |                      |                        |

### User Spectra

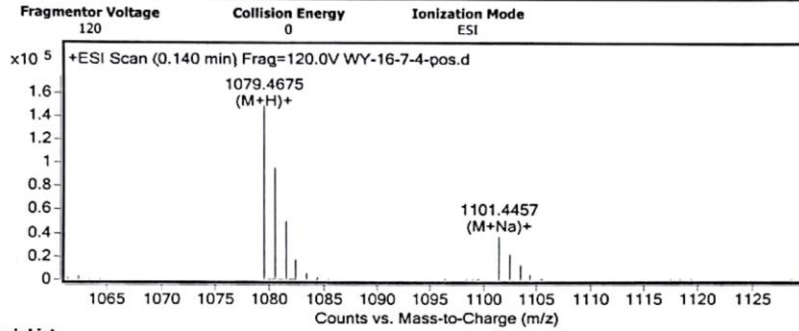

#### Peak List

| m/z      | z | Abund     |
|----------|---|-----------|
| 130.1611 | 1 | 647301.1  |
| 163.1355 | 1 | 1325325.3 |
| 185.117  | 1 | 399494.8  |
| 332.1437 | 1 | 219393.2  |
| 338.3454 | 1 | 661168.6  |
| 360.4978 | 1 | 598103.7  |
| 360.8317 | 1 | 390964.1  |
| 361.1645 |   | 203232.2  |
| 540.2407 | 2 | 381808.8  |
| 540.7409 | 2 | 245740.7  |

#### Formula Calculator Element Limits

| Element | Min | Max |
|---------|-----|-----|
| C       | 3   | 60  |
| H       | 0   | 120 |
| O       | 7   | 7   |
| N       | 0   | 30  |
| S       | 3   | 3   |

#### Formula Calculator Results

| Formula           | Best | Mass      | Tgt Mass  | Diff (ppm) | Ion Species          | Score |
|-------------------|------|-----------|-----------|------------|----------------------|-------|
| C55 H70 N10 O7 S3 | TRUE | 1078.4602 | 1078.4591 | -0.99      | C55 H71 N10 O7 S3    | 98.12 |
| C55 H70 N10 O7 S3 | TRUE | 1078.4567 | 1078.4591 | 2.24       | C55 H70 N10 Na O7 S3 | 94.33 |

--- End Of Report ---

## Qualitative Analysis Report

|                        |               |               |                     |
|------------------------|---------------|---------------|---------------------|
| Data Filename          | 8-2.d         | Sample Name   | BK                  |
| Sample Type            | Sample        | Position      | P1-A5               |
| Instrument Name        | Instrument 1  | User Name     |                     |
| Acq Method             | TEST-POS-WL.m | Acquired Time | 1/2/2019 3:47:19 PM |
| IRM Calibration Status | Success       | DA Method     | Default.m           |
| Comment                |               |               |                     |
| Sample Group           | Info.         |               |                     |

### User Spectra

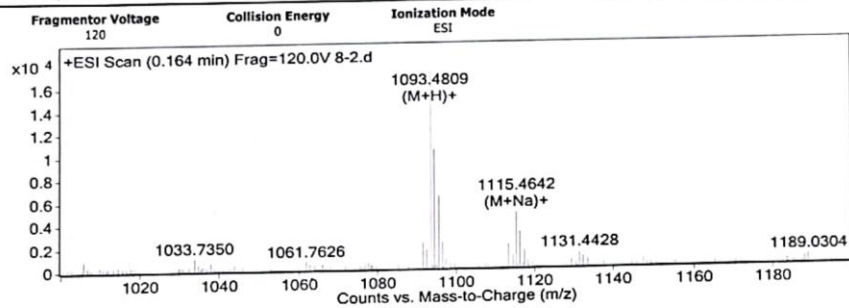

#### Peak List

| m/z      | z | Abund    |
|----------|---|----------|
| 130.1596 | 1 | 286288.9 |
| 364.5131 |   | 37439.9  |
| 365.17   | 1 | 710847.1 |
| 365.5037 | 1 | 505738   |
| 365.8351 | 1 | 257849.8 |
| 366.1685 | 1 | 102987.9 |
| 547.2466 | 2 | 158171.7 |
| 547.748  | 2 | 103174   |
| 548.2474 | 2 | 55056.5  |
| 922.0098 | 1 | 34977.7  |

#### Formula Calculator Element Limits

| Element | Min | Max |
|---------|-----|-----|
| C       | 3   | 105 |
| H       | 0   | 130 |
| O       | 0   | 7   |
| N       | 0   | 10  |
| S       | 1   | 3   |

#### Formula Calculator Results

| Formula           | Best | Mass      | Tgt Mass  | Diff (ppm) | Ion Species          | Score |
|-------------------|------|-----------|-----------|------------|----------------------|-------|
| C56 H72 N10 O7 S3 | TRUE | 1092.4742 | 1092.4748 | 0.55       | C56 H72 N10 Na O7 S3 | 91.22 |
| C64 H68 N8 O5 S2  |      | 1092.4741 | 1092.4754 | 1.21       | C64 H68 N8 Na O5 S2  | 91.15 |
| C56 H72 N10 O7 S3 | TRUE | 1092.4739 | 1092.4748 | 0.81       | C56 H73 N10 O7 S3    | 96.72 |
| C68 H68 N8 S3     |      | 1092.4738 | 1092.4729 | -0.84      | C68 H69 N8 S3        | 91.69 |
| C67 H72 N4 O4 S3  |      | 1092.4738 | 1092.4716 | -2.04      | C67 H73 N4 O4 S3     | 90.27 |

--- End Of Report ---



## Qualitative Analysis Report

|                               |               |                      |                      |
|-------------------------------|---------------|----------------------|----------------------|
| <b>Data Filename</b>          | WY-16-8-3.d   | <b>Sample Name</b>   | WY-16-8-3            |
| <b>Sample Type</b>            | Sample        | <b>Position</b>      | P1-A4                |
| <b>Instrument Name</b>        | Instrument 1  | <b>User Name</b>     |                      |
| <b>Acq Method</b>             | TEST-POS-WL.m | <b>Acquired Time</b> | 1/8/2019 10:04:55 AM |
| <b>IRM Calibration Status</b> | Success       | <b>DA Method</b>     | 00000.m              |
| <b>Comment</b>                |               |                      |                      |

Sample Group      Info.

### User Spectra

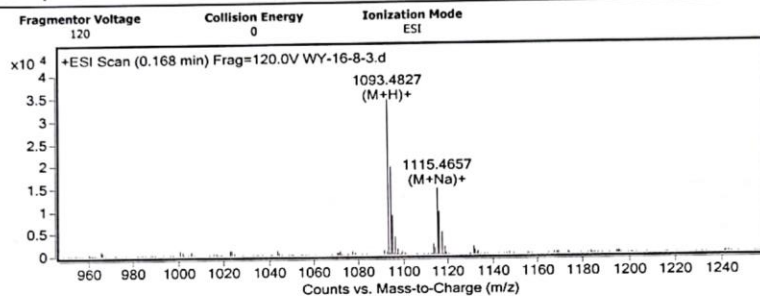

#### Peak List

| m/z      | z | Abund    |
|----------|---|----------|
| 274.2761 | 1 | 160851.9 |
| 318.3028 | 1 | 136236.2 |
| 338.3439 | 1 | 146855.2 |
| 365.1713 | 1 | 469343.8 |
| 365.5042 | 1 | 331310   |
| 365.837  |   | 172551.3 |
| 366.1694 | 1 | 72154    |
| 547.2486 | 2 | 147798.1 |
| 547.7496 | 2 | 100624.4 |
| 650.3374 | 1 | 145979.4 |

#### Formula Calculator Element Limits

| Element | Min | Max |
|---------|-----|-----|
| C       | 3   | 60  |
| H       | 0   | 120 |
| N       | 0   | 10  |
| S       | 0   | 3   |
| O       | 0   | 10  |

#### Formula Calculator Results

| Formula           | Best | Mass      | Tgt Mass  | Diff (ppm) | Ion Species          | Score |
|-------------------|------|-----------|-----------|------------|----------------------|-------|
| C56 H72 N10 O7 S3 | TRUE | 1092.4752 | 1092.4748 | -0.4       | C56 H73 N10 O7 S3    | 92.25 |
| C56 H72 N10 O7 S3 | TRUE | 1092.476  | 1092.4748 | -1.14      | C56 H72 N10 Na O7 S3 | 96.59 |

--- End Of Report ---

# Qualitative Analysis Report

8-6

|                        |              |               |                        |
|------------------------|--------------|---------------|------------------------|
| Data Filename          | wy-8-4.d     | Sample Name   | P1-A4                  |
| Sample Type            | Sample       | Position      | P1-A4                  |
| Instrument Name        | Instrument 1 | User Name     |                        |
| Acq Method             | TEST-POS-WLM | Acquired Time | 11/14/2018 12:05:57 PM |
| IRM Calibration Status | Success      | DA Method     | 1.m                    |
| Comment                |              |               |                        |
| Sample Group           | Info.        |               |                        |

### User Spectra

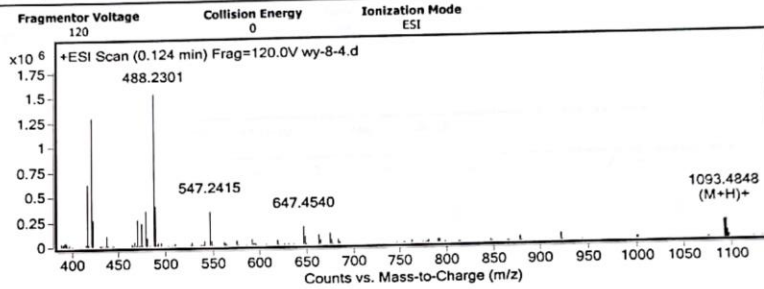

#### Peak List

| m/z      | z | Abund     |
|----------|---|-----------|
| 151.0264 |   | 897297.8  |
| 163.1267 |   | 909274.5  |
| 185.1085 |   | 525805.7  |
| 244.6147 | 2 | 899317.9  |
| 338.3364 | 1 | 534974.9  |
| 416.26   | 1 | 617868.8  |
| 421.2161 | 1 | 1293221   |
| 479.2211 |   | 357185.9  |
| 488.2301 | 1 | 1525485.6 |
| 489.2323 | 1 | 402292.5  |

#### Formula Calculator Element Limits

| Element | Min | Max |
|---------|-----|-----|
| C       | 0   | 60  |
| H       | 0   | 200 |
| O       | 0   | 20  |
| N       | 0   | 10  |
| S       | 3   | 3   |

#### Formula Calculator Results

| Formula           | Best | Mass      | Tgt Mass  | Diff (ppm) | Ion Species       | Score |
|-------------------|------|-----------|-----------|------------|-------------------|-------|
| C56 H72 N10 O7 S3 | TRUE | 1092.4776 | 1092.4748 | -2.61      | C56 H73 N10 O7 S3 | 91.32 |

--- End Of Report ---

## Qualitative Analysis Report

|                        |               |               |                      |
|------------------------|---------------|---------------|----------------------|
| Data Filename          | WY-16-20-4.d  | Sample Name   |                      |
| Sample Type            | Sample        | Position      | P1-A8                |
| Instrument Name        | Instrument 1  | User Name     |                      |
| Acq Method             | TEST-POS-WL.m | Acquired Time | 12/3/2018 9:44:24 AM |
| IRM Calibration Status | Success       | DA Method     | 1.m                  |
| Comment                |               |               |                      |

Sample Group      Info.

### User Spectra

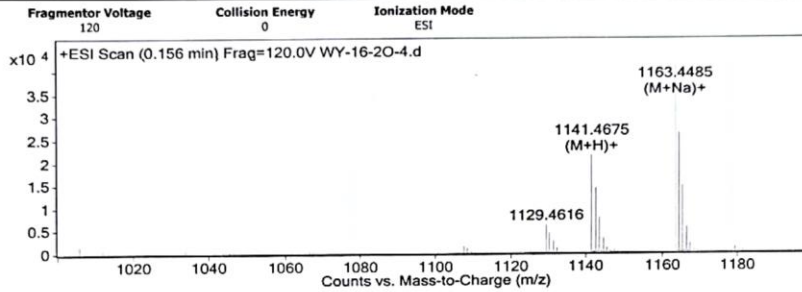

#### Peak List

| m/z       | z | Abund   | Formula               | Ion     |
|-----------|---|---------|-----------------------|---------|
| 121.0509  |   | 37332.2 |                       |         |
| 381.1626  | 1 | 136839  |                       |         |
| 381.4967  | 1 | 96133.4 |                       |         |
| 381.8298  |   | 55613.7 |                       |         |
| 571.2387  | 2 | 53489.7 |                       |         |
| 676.3386  | 1 | 57398.8 |                       |         |
| 698.3209  | 1 | 108053  |                       |         |
| 699.3232  | 1 | 36767.5 |                       |         |
| 922.0098  | 1 | 51557.9 |                       |         |
| 1163.4485 | 1 | 41067.9 | C56 H72 N10 Na O10 S3 | (M+Na)+ |

#### Formula Calculator Element Limits

| Element | Min | Max |
|---------|-----|-----|
| C       | 0   | 100 |
| H       | 0   | 200 |
| O       | 0   | 20  |
| N       | 0   | 20  |
| S       | 0   | 10  |

#### Formula Calculator Results

| Formula            | Best | Mass      | Tgt Mass  | Diff (ppm) | Ion Species           | Score |
|--------------------|------|-----------|-----------|------------|-----------------------|-------|
| C56 H72 N10 O10 S3 | TRUE | 1140.4598 | 1140.4595 | -0.3       | C56 H73 N10 O10 S3    | 98.8  |
| C55 H66 N17 O5 S3  |      | 1140.4599 | 1140.4595 | -0.36      | C55 H67 N17 O5 S3     | 98.79 |
| C57 H78 N3 O15 S3  |      | 1140.4598 | 1140.4595 | -0.24      | C57 H79 N3 O15 S3     | 98.48 |
| C57 H68 N14 O6 S3  |      | 1140.4599 | 1140.4608 | 0.85       | C57 H69 N14 O6 S3     | 98.02 |
| C57 H78 N3 O15 S3  |      | 1140.4594 | 1140.4595 | 0.13       | C57 H78 N3 Na O15 S3  | 99.13 |
| C56 H72 N10 O10 S3 | TRUE | 1140.4594 | 1140.4595 | 0.07       | C56 H72 N10 Na O10 S3 | 99.12 |

--- End Of Report ---

## Qualitative Analysis Report

|                        |               |               |                        |
|------------------------|---------------|---------------|------------------------|
| Data Filename          | WY-16-20-4.d  | Sample Name   |                        |
| Sample Type            | Sample        | Position      | P1-A8                  |
| Instrument Name        | Instrument 1  | User Name     |                        |
| Acq Method             | TEST-POS-WL.m | Acquired Time | 12/12/2018 10:31:15 AM |
| IRM Calibration Status | Success       | DA Method     | 1.m                    |
| Comment                |               |               |                        |
| Sample Group           | Info.         |               |                        |

### User Spectra

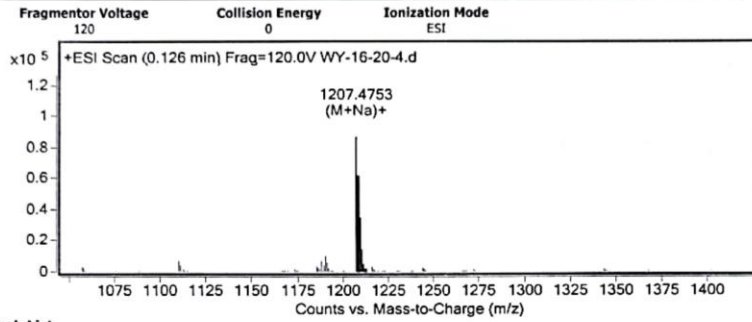

#### Peak List

| m/z       | z | Abund    | Formula               | Ion     |
|-----------|---|----------|-----------------------|---------|
| 130.1607  | 1 | 512342.4 |                       |         |
| 136.0506  |   | 56825.2  |                       |         |
| 185.1167  | 1 | 469091.8 |                       |         |
| 338.3417  |   | 83111.6  |                       |         |
| 353.2664  |   | 73337.6  |                       |         |
| 381.2971  |   | 73380.1  |                       |         |
| 395.8374  |   | 110749.4 |                       |         |
| 396.1715  |   | 82508.4  |                       |         |
| 1207.4753 | 1 | 87043    | C58 H76 N10 Na O11 S3 | (M+Na)+ |
| 1208.4786 | 1 | 57264.1  | C58 H76 N10 Na O11 S3 | (M+Na)+ |

#### Formula Calculator Element Limits

| Element | Min | Max |
|---------|-----|-----|
| C       | 3   | 60  |
| H       | 0   | 120 |
| O       | 0   | 20  |
| N       | 0   | 10  |
| S       | 3   | 3   |

#### Formula Calculator Results

| Formula            | Best | Mass      | Ygt Mass  | Diff (ppm) | Ion Species           | Score |
|--------------------|------|-----------|-----------|------------|-----------------------|-------|
| C58 H76 N10 O11 S3 | TRUE | 1184.4862 | 1184.4857 | -0.39      | C58 H76 N10 Na O11 S3 | 98.69 |

--- End Of Report ---

## Qualitative Analysis Report

|                        |               |               |                       |
|------------------------|---------------|---------------|-----------------------|
| Data Filename          | WY-PH.d       | Sample Name   |                       |
| Sample Type            | Sample        | Position      | P1-D5                 |
| Instrument Name        | Instrument 1  | User Name     |                       |
| Acq Method             | TEST-POS-WL.m | Acquired Time | 3/28/2019 10:56:58 AM |
| IRM Calibration Status | Success       | DA Method     | Default.m             |
| Comment                |               |               |                       |
| Sample Group           | Info.         |               |                       |

### User Spectra

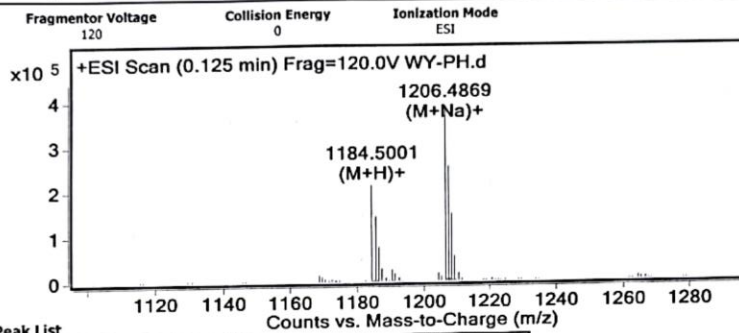

#### Peak List

| m/z       | z | Abund     | Formula              | Ion     |
|-----------|---|-----------|----------------------|---------|
| 592.7593  | 2 | 1366359.5 |                      |         |
| 593.2605  | 2 | 977482.8  |                      |         |
| 593.7596  | 2 | 536137.5  |                      |         |
| 594.2572  | 2 | 220685.3  |                      |         |
| 603.7471  | 2 | 251307    |                      |         |
| 758.3461  | 1 | 426330.3  |                      |         |
| 759.3453  | 1 | 175976.6  |                      |         |
| 1184.5001 | 1 | 213756.5  | C59 H78 N9 O11 S3    | (M+H)+  |
| 1206.4869 | 1 | 378930.3  | C59 H77 N9 Na O11 S3 | (M+Na)+ |
| 1207.4861 | 1 | 255894.2  | C59 H77 N9 Na O11 S3 | (M+Na)+ |

#### Formula Calculator Element Limits

| Element | Min | Max |
|---------|-----|-----|
| C       | 0   | 80  |
| H       | 0   | 120 |
| O       | 11  | 11  |
| N       | 9   | 9   |
| S       | 3   | 3   |

#### Formula Calculator Results

| Formula           | Best | Mass      | Tgt Mass  | Diff (ppm) | Ion Species          | Score |
|-------------------|------|-----------|-----------|------------|----------------------|-------|
| C59 H77 N9 O11 S3 | TRUE | 1183.4927 | 1183.4905 | -1.9       | C59 H78 N9 O11 S3    | 95.46 |
| C59 H77 N9 O11 S3 | TRUE | 1183.4966 | 1183.4905 | -5.18      | C59 H77 N9 Na O11 S3 | 75.59 |

--- End Of Report ---

## Qualitative Analysis Report

|                               |                  |                      |                       |
|-------------------------------|------------------|----------------------|-----------------------|
| <b>Data Filename</b>          | WY-RE.d          | <b>Sample Name</b>   |                       |
| <b>Sample Type</b>            | Sample           | <b>Position</b>      | P1-B8                 |
| <b>Instrument Name</b>        | Instrument 1     | <b>User Name</b>     |                       |
| <b>Acq Method</b>             | TEST-POS-WL.m    | <b>Acquired Time</b> | 10/9/2019 10:21:16 AM |
| <b>IRM Calibration Status</b> | Some Ions Missed | <b>DA Method</b>     | SERUM-POS-19MIN.m     |
| <b>Comment</b>                |                  |                      |                       |
| <b>Sample Group</b>           | Info.            |                      |                       |

### User Spectra

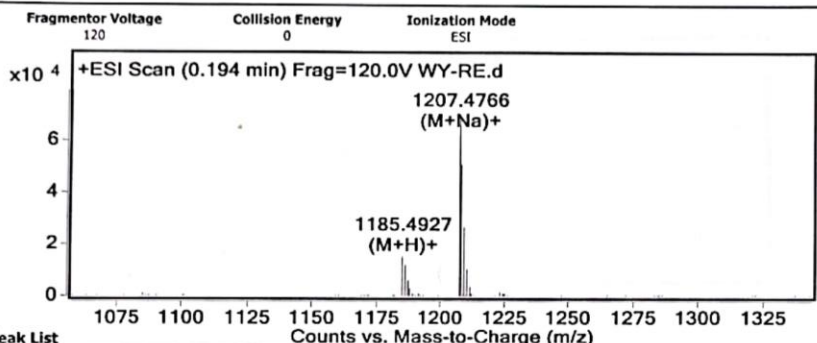

| Peak List |   |         |                       |         |
|-----------|---|---------|-----------------------|---------|
| m/z       | z | Abund   | Formula               | Ion     |
| 395.8402  |   | 68454   |                       |         |
| 396.1741  |   | 48828.8 |                       |         |
| 396.5065  |   | 28088.4 |                       |         |
| 593.2539  | 2 | 30749.2 |                       |         |
| 593.7529  | 2 | 24517.6 |                       |         |
| 594.2543  | 2 | 15678.2 |                       |         |
| 742.3467  |   | 20105.3 |                       |         |
| 1207.4766 | 1 | 68637.1 | C58 H76 N10 Na O11 S3 | (M+Na)+ |
| 1208.478  | 1 | 51361.7 | C58 H76 N10 Na O11 S3 | (M+Na)+ |
| 1209.4765 | 1 | 26804   | C58 H76 N10 Na O11 S3 | (M+Na)+ |

#### Formula Calculator Element Limits

| Element | Min | Max |
|---------|-----|-----|
| C       | 0   | 100 |
| H       | 0   | 150 |
| N       | 10  | 10  |
| O       | 11  | 11  |
| S       | 3   | 3   |

#### Formula Calculator Results

| Formula            | Best | Mass      | Tgt Mass  | Diff (ppm) | Ion Species           | Score |
|--------------------|------|-----------|-----------|------------|-----------------------|-------|
| C58 H76 N10 O11 S3 | TRUE | 1184.4845 | 1184.4857 | 1          | C58 H77 N10 O11 S3    | 94.67 |
| C58 H76 N10 O11 S3 | TRUE | 1184.4868 | 1184.4857 | -0.94      | C58 H76 N10 Na O11 S3 | 96.18 |

--- End Of Report ---

### **Supporting references**

1. Neuhaus JM, Sticher L, Meins F Jr, Boller T. A short C-terminal sequence is necessary and sufficient for the targeting of chitinases to the plant vacuole. *Proc Natl Acad Sci U S A* 1991;**88**:10362-6.
2. van Sebille E, Doblin M. Data from “Drift in ocean currents impacts intergenerational microbial exposure to temperature.” Figshare. Available from: <https://dx.doi.org/10.6084/m9.figshare.3178534.v2>. Deposited 15 April 2016.
3. Hill AVS. HLA associations with malaria in Africa: Some implications for MHC evolution. In: Klein J, Klein D, Editors. *Molecular evolution of the major histocompatibility complex*. 1991; Springer. p. 403–20.
